# Supplementary material for: Experimental and computational study of alkane dehydrogenation catalyzed by a carbazolide-based rhodium PNP pincer complex
Source: PubMed Central journal article supplement (PMC5477040; doi:10.1039/c5sc04794c), 2016-01-20
Supplement: SC-007-C5SC04794C-s001.pdf [file SC-007-C5SC04794C-s001.pdf]

## Supporting Information

### Experimental and Computational Study of Alkane Dehydrogenation Catalyzed by a Carbazolide-Based Rhodium PNP Pincer Complex

David Bézier,<sup>†</sup> Changjian Guan,<sup>‡</sup> Karsten Krogh-Jespersen,<sup>‡</sup> Alan S. Goldman<sup>\*‡</sup> and  
Maurice Brookhart<sup>\*, †</sup>

<sup>†</sup> Department of Chemistry, The University of North Carolina at Chapel Hill, Chapel Hill, North Carolina 27599, United States.

<sup>‡</sup> Department of Chemistry and Chemical Biology, Rutgers, The State University of New Jersey, New Brunswick, New Jersey 08903, United States.

E-mail: alan.goldman@rutgers.edu; mbrookhart@unc.edu

### Contents

|                                                                                            |     |
|--------------------------------------------------------------------------------------------|-----|
| 1) General experimental details                                                            | S2  |
| 2) Experimental procedures and data                                                        | S2  |
| 3) Images of NMR spectra for new compounds                                                 | S6  |
| 4) References                                                                              | S13 |
| 5) Computational Details                                                                   | S14 |
| 6) Assessment of “Phosphine Sterics” Model: <sup>tBu2Me2</sup> PNP vs. <sup>iPr4</sup> PNP | S15 |
| 7) Structures and energies for computational model species                                 | S16 |

## 1) General experimental details

All manipulations were carried out under an argon atmosphere using standard Schlenk, high-vacuum, and glovebox techniques. Argon was purified by passing through columns of BASF R3-11 catalyst (Chemalog) and 4 Å molecular sieves. Benzene-d<sub>6</sub> and toluene-d<sub>8</sub> (Cambridge Isotope Laboratories) were used without purification. Benzene, toluene, cyclooctane (COA) (99%), *tert*-butylethylene (TBE) (98.5%) and *n*-octane (99%) were distilled from sodium, then degassed by three freeze-pump-thaw cycles and stored in an argon atmosphere glovebox prior to use. 1,8-Bis((diisopropylphosphino)methyl)-3,6-dimethyl-9H-carbazole<sup>S1</sup> and [Rh(ethylene)<sub>2</sub>Cl]<sub>2</sub><sup>S2</sup> were prepared according to reported procedures. All other reagents and solvents mentioned in this text were purchased from commercial sources and used as received. NMR spectra were recorded on Bruker spectrometers (DRX-400, AVANCE-400, AVANCE-500 and AVANCE-600). <sup>1</sup>H and <sup>13</sup>C NMR spectra were referenced to residual solvent peaks. <sup>31</sup>P NMR chemical shifts were referenced to an external H<sub>3</sub>PO<sub>4</sub> standard. Gas chromatographic analysis of reactions was conducted on an Agilent Technologies 6850 GC instrument fitted with a fused silica capillary column (100 m length × 0.25 mm ID × 0.50 μm film thickness) using the following parameters: FID detector: temperature = 300 °C, initial temperature: 40 °C, final temperature: 250 °C; oven program: 40 °C, hold for 20 min, ramp 1: 85 °C/min to 150 °C, hold for 5 min, ramp 2: 10 °C/min to 250 °C, hold for 20 min. Calibration curves were prepared using standard samples. Products were confirmed using authentic samples and calibrated with an internal standard (mesitylene).

## 2) Experimental procedures and data

**a) Synthesis of 1,8-Bis((diisopropylphosphino)methyl)-3,6-dimethylcarbazolide Rhodium(I) Ethylene (2-C<sub>2</sub>H<sub>4</sub>).** To a solution of 1,8-bis((diisopropylphosphino)methyl)-3,6-dimethyl-9H-carbazole (0.200 g, 0.44 mmol) in benzene (15 mL) was added slowly LiN(TMS)<sub>2</sub> (0.074 g, 0.44 mmol) at 23 °C, and the solution turned dark brown instantly. After stirring for 5 min, a solution of [(C<sub>2</sub>H<sub>4</sub>)<sub>2</sub>RhCl]<sub>2</sub> (0.085 g, 0.22 mmol) in benzene (5 mL) was added to the reaction mixture. After stirring for 10 min, the reaction mixture was filtered, and the volatiles were evaporated to afford a brown solid. The solid was washed 6 times with *n*-octane at -40 °C, dried under vacuum, affording **2-C<sub>2</sub>H<sub>4</sub>** as a yellow solid (0.19 g, 0.25 mmol, 57%). <sup>31</sup>P{<sup>1</sup>H} NMR (C<sub>6</sub>D<sub>6</sub>, 243 MHz): δ 44.12 (d, *J*<sub>P-Rh</sub> = 130 Hz). <sup>1</sup>H NMR (C<sub>6</sub>D<sub>6</sub>, 400 MHz): δ 8.07 (s, 2H, Ar-H), 6.96 (s, 2H, Ar-H), 2.89 (s, 4H, CH<sub>2</sub>), 2.64 (s, 6H, Ar-CH<sub>3</sub>), 2.51 (vt, *J*<sub>P-H</sub> = 5.2 Hz, 4H, C<sub>2</sub>H<sub>4</sub>), 1.74-1.69 (m, 4H, CH(CH<sub>3</sub>)<sub>2</sub>), 1.04 (q, *J* = 7.2 Hz, 12H, CH(CH<sub>3</sub>)<sub>2</sub>), 0.95 (q, *J* = 6.5 Hz, 12H, CH(CH<sub>3</sub>)<sub>2</sub>). <sup>13</sup>C NMR (toluene-d<sub>8</sub>, 126 MHz): δ 149.58 (vt, *J* = 3.8 Hz, 2C), 126.33 (vt, *J* = 3.1 Hz, 2C), 125.73 (s, 2C), 124.67 (s, 2C), 120.52 (s, 2C), 118.99 (s, 2C), 36.29 (d, *J* = 12.7 Hz, 2C), 24.11 (vt, *J* = 9.6 Hz, 4C), 22.14 (vt, *J* = 9.1 Hz, 4C), 21.59 (s, 4C), 19.84 (s, 2C), 17.78 (s, 2C). Anal. Calcd for C<sub>30</sub>H<sub>46</sub>NP<sub>2</sub>Rh: C 61.54, H 7.92, N 2.39; found: C 61.76, H 8.04, N 2.19.

**b) Synthesis of 1,8-Bis((diisopropylphosphino)methyl)-3,6-dimethylcarbazolide Rhodium(I) carbonyl (2-CO).** Carbon monoxide was purged through a solution of **2-C<sub>2</sub>H<sub>4</sub>** (16 mg, 0.027 mmol) in toluene (1 mL) for 10 min. The solvent was evaporated affording **2-CO** as a yellow solid (15 mg, 0.025 mmol, 94%). <sup>31</sup>P{<sup>1</sup>H} NMR (C<sub>6</sub>D<sub>6</sub>, 243 MHz): δ 54.68 (d, *J*<sub>P-Rh</sub> = 125 Hz). <sup>1</sup>H NMR (C<sub>6</sub>D<sub>6</sub>, 600 MHz): δ 8.04 (s, 2H, Ar-H), 6.98 (s, 2H, Ar-H), 3.04 (vt, *J*<sub>P-H</sub> = 3.4 Hz, 4H, CH<sub>2</sub>), 2.62

(s, 6H, Ar-CH<sub>3</sub>), 2.00-1.98 (m, 4H, CH(CH<sub>3</sub>)<sub>2</sub>), 1.15 (q,  $J = 7.4$  Hz, 12H, CH(CH<sub>3</sub>)<sub>2</sub>), 0.94 (q,  $J = 7.0$  Hz, 12H, CH(CH<sub>3</sub>)<sub>2</sub>). <sup>13</sup>C NMR (C<sub>6</sub>D<sub>6</sub>, 151 MHz):  $\delta$  194.86 (dt,  $J = 62$  Hz,  $J = 19$  Hz, 1C, CO), 148.63 (vt,  $J = 4.9$  Hz, 2C), 127.08 (vt,  $J = 3.6$  Hz, 2C), 126.49 (s, 2C), 125.15 (s, 2C), 120.46 (s, 2C), 119.46 (s, 2C), 26.08 (vt,  $J = 12.4$  Hz, 4C), 22.04 (vt,  $J = 9.4$  Hz, 4C), 21.63 (s, 4C), 19.28 (s, 2C), 18.39 (s, 2C). Anal. Calcd for C<sub>29</sub>H<sub>42</sub>NOP<sub>2</sub>Rh: C 59.49, H 7.23, N 2.39; found: C 59.13, H 7.59, N 2.07. IR (hexanes, cm<sup>-1</sup>): 1954  $\nu$ (CO).

**c) Synthesis of 1,8-Bis((diisopropylphosphino)methyl)-3,6-dimethylcarbazolide Rhodium(I) dihydride (2-H<sub>2</sub>).** Hydrogen was purged through a solution of **2-C<sub>2</sub>H<sub>4</sub>** (100 mg, 0.17 mmol) in toluene (5 mL) for 20 min. The solvent was evaporated and the solid was washed 4 times with *n*-octane at -40 °C, dried under vacuum, affording **2-H<sub>2</sub>** as a yellow solid (65 mg, 0.12 mmol, 68%). <sup>31</sup>P{<sup>1</sup>H} NMR (C<sub>6</sub>D<sub>6</sub>, 162 MHz):  $\delta$  65.70 (d,  $J_{P-Rh} = 121$  Hz). <sup>1</sup>H NMR (C<sub>6</sub>D<sub>6</sub>, 400 MHz):  $\delta$  8.08 (s, 2H, Ar-H), 7.04 (s, 2H, Ar-H), 3.07 (s, 4H, CH<sub>2</sub>), 2.63 (s, 6H, Ar-CH<sub>3</sub>), 1.71-1.69 (m, 4H, CH(CH<sub>3</sub>)<sub>2</sub>), 1.00 (q,  $J = 7.0$  Hz, 12H, CH(CH<sub>3</sub>)<sub>2</sub>), 0.92 (q,  $J = 7.4$  Hz, 12H, CH(CH<sub>3</sub>)<sub>2</sub>), -19.69 (q,  $J = 16.0$  Hz, 2H, RhH). <sup>13</sup>C NMR (toluene-d<sub>8</sub>, 126 MHz):  $\delta$  148.74 (vt,  $J = 4.2$  Hz, 2C), 127.49 (vt,  $J = 3.5$  Hz, 2C), 126.42 (s, 2C), 125.29 (s, 2C), 121.40 (s, 2C), 119.50 (s, 2C), 25.05 (vt,  $J = 12.7$  Hz, 4C), 23.49 (vt,  $J = 9.3$  Hz, 4C), 21.76 (s, 4C), 19.00 (s, 2C), 18.81 (s, 2C). Anal. Calcd for C<sub>28</sub>H<sub>44</sub>NP<sub>2</sub>Rh: C 60.11, H 7.93 N 2.50; found: C 60.43, H 8.33, N 2.19.

**d) Observation of 1,8-Bis((diisopropylphosphino)methyl)-3,6-dimethylcarbazolide Rhodium(I) tert-butylethylene (2-TBE).** In a J-Young tube, TBE (14  $\mu$ L, 0.102 mmol) was added to a solution of **2-H<sub>2</sub>** (4 mg, 6.8  $\mu$ mol) in toluene-d<sub>8</sub> (0.6 mL) and heated at 80 °C for 3 h affording **(2-TBE)** in a 50 % NMR yield determined via the use of an internal standard. <sup>31</sup>P{<sup>1</sup>H} NMR (toluene-d<sub>8</sub>, 162 MHz):  $\delta = 26.21$  (dd,  $J_{P-P} = 346$  Hz,  $J_{P-Rh} = 140$  Hz),  $\delta = 13.26$  (dd,  $J_{PP} = 347$  Hz,  $J_{P-Rh} = 130$  Hz).

**e) Observation of 1,8-Bis((diisopropylphosphino)methyl)-3,6-dimethylcarbazolide Rhodium(III) Ethylene cis-Dihydride (2-H<sub>2</sub>(C<sub>2</sub>H<sub>4</sub>)).** Ethylene was added by a gas tight syringe through a solution of **2-H<sub>2</sub>** (6.7 mg, 0.011 mmol) in toluene-d<sub>8</sub> (0.5 mL) at -88 °C, and the product **2-H<sub>2</sub>(C<sub>2</sub>H<sub>4</sub>)** formed quantitatively. <sup>31</sup>P{<sup>1</sup>H} NMR (toluene-d<sub>8</sub>, 202 MHz):  $\delta$  84.23 (bs). <sup>1</sup>H NMR (toluene-d<sub>8</sub>, 500 MHz): Due to some broad signals, only hydride peaks were assigned:  $\delta$  -11.07 (bs, 1H), -20.22 (bs, 1H).

**f) General Procedure for Transfer Dehydrogenation of COA or *n*-octane with TBE Catalyzed by 2-H<sub>2</sub>.** In an argon filled glovebox, a 4 mL Kontes vial equipped with a Teflon screw-cap and a stir bar was charged with the complex **2-H<sub>2</sub>** (3.8 mg, 6.83  $\mu$ mol, 0.3 mol%) and dissolved in a solution of COA (313  $\mu$ L, 2.33 mmol) or *n*-octane (378  $\mu$ L, 2.33 mmol). TBE (300  $\mu$ L, 2.33 mmol) was added to the solution, the flask was sealed and heated in a preheated oil-bath at 200 °C. At regular intervals, the tube was cooled to room temperature and a sample was analyzed by gas chromatography.

**g) Rate of ethylene dissociation from 3e**

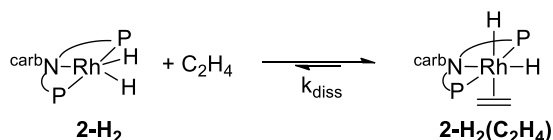

The rate of ethylene dissociation in a temperature range of 185-193 K was estimated via the  $^1\text{H}$  NMR line broadening of the two hydride signals at  $\delta$  -20 ppm.

At  $T = 193$  K:

$$\Delta\omega = 13 \text{ s}^{-1}$$

$$k_{\text{diss}} = 82 \text{ s}^{-1}$$

$$\Delta G^\ddagger = 9 \pm 1 \text{ kcal} \cdot \text{mol}^{-1}$$

**h) Reaction of (carb-PNP)Rh(H)<sub>2</sub> 2-H<sub>2</sub> with C<sub>2</sub>H<sub>4</sub> to give 2-C<sub>2</sub>H<sub>4</sub> and C<sub>2</sub>H<sub>6</sub>**

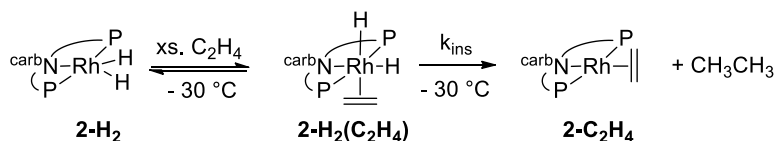

**2-H<sub>2</sub>(C<sub>2</sub>H<sub>4</sub>)** was formed *in situ* via the addition of C<sub>2</sub>H<sub>4</sub> by a gas tight syringe to a solution of **2-H<sub>2</sub>** (4 mg, 7.15  $\mu\text{mol}$ ) in toluene  $d_8$  at  $-80$   $^\circ\text{C}$ . The reactions were monitored by  $^1\text{H}$  NMR and  $^{31}\text{P}$  NMR spectroscopy. The concentration of ethylene in solution was estimated by  $^1\text{H}$  NMR integration. Due to the equilibrium between **2-H<sub>2</sub>** and **2-H<sub>2</sub>(C<sub>2</sub>H<sub>4</sub>)** at  $-30$   $^\circ\text{C}$ ,  $k_{\text{obs}}$  was corrected by taking in consideration the ratio  $A = \mathbf{2\text{-H}_2(\text{C}_2\text{H}_4)} / (\mathbf{2\text{-H}_2} + \mathbf{2\text{-H}_2(\text{C}_2\text{H}_4)})$  (determined by  $^{31}\text{P}$  NMR). The results are summarized below.

| [C <sub>2</sub> H <sub>4</sub> ] (M) | A =<br>$\mathbf{2\text{-H}_2(\text{C}_2\text{H}_4)} / (\mathbf{2\text{-H}_2} + \mathbf{2\text{-H}_2(\text{C}_2\text{H}_4)})$ | $k_{\text{obs}}$ (s <sup>-1</sup> ) | $k_{\text{corr}}$ (corrected rate) (s <sup>-1</sup> ) =<br>$k_{\text{obs}}$ (s <sup>-1</sup> ) / A |
|--------------------------------------|------------------------------------------------------------------------------------------------------------------------------|-------------------------------------|----------------------------------------------------------------------------------------------------|
| 0.045                                | 0.16                                                                                                                         | 4.20E-05                            | 2.63E-04                                                                                           |
| 0.18                                 | 0.42                                                                                                                         | 9.10E-05                            | 2.15E-04                                                                                           |
| 0.25                                 | 0.47                                                                                                                         | 1.08E-04                            | 2.29E-04                                                                                           |
| 0.37                                 | 0.617                                                                                                                        | 1.30E-04                            | 2.11E-04                                                                                           |
| 0.46                                 | 0.625                                                                                                                        | 1.65E-04                            | 2.64E-04                                                                                           |

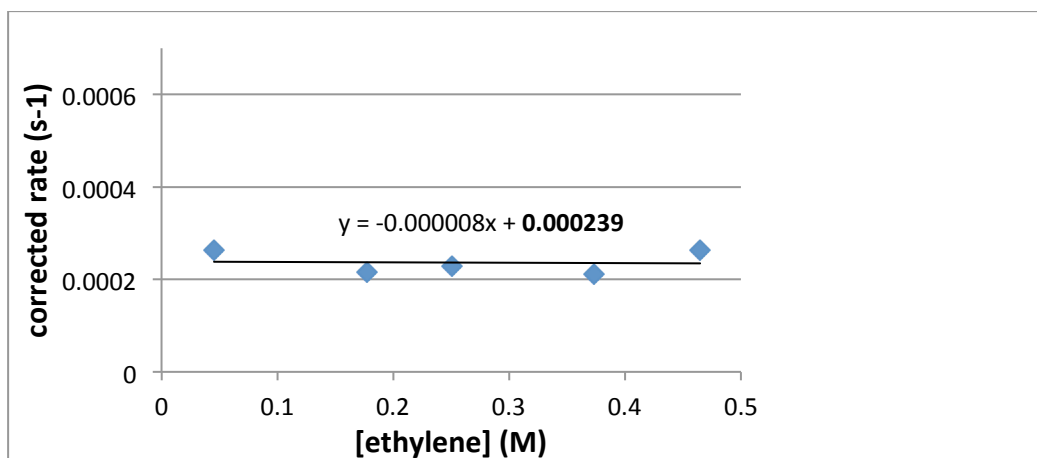

At  $-30\text{ }^{\circ}\text{C}$ :  $k_{\text{corr}} = 2.4 \times 10^{-4}\text{ s}^{-1}$ ;  $\Delta G^{\ddagger} = 18\text{ kcal}\cdot\text{mol}^{-1}$

### i) Deuterium labeling experiments

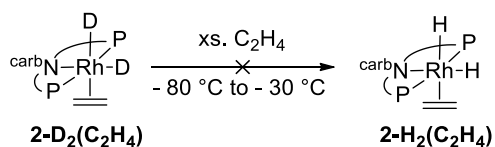

**2-D<sub>2</sub>(C<sub>2</sub>H<sub>4</sub>)** was prepared by purging D<sub>2</sub> through a solution of **2-C<sub>2</sub>H<sub>4</sub>** (4.0 mg, 6.8 μmol) in toluene-d<sup>8</sup> (0.6 mL) in a screw-cap NMR tube at room temperature for 10 min, followed by purging with argon for 10 min at rt, and finally C<sub>2</sub>H<sub>4</sub> (30 equiv., 0.37 M) was added by gas tight syringe at  $-80\text{ }^{\circ}\text{C}$ . Starting at  $-80\text{ }^{\circ}\text{C}$ , the reaction was followed by <sup>1</sup>H NMR and warmed up gradually (10 °C every 30 minutes) to  $-30\text{ }^{\circ}\text{C}$ . No formation of **2-H<sub>2</sub>(C<sub>2</sub>H<sub>4</sub>)** was detected during the course of this reaction.

## 3) Images of NMR spectra for all new compounds

In C<sub>6</sub>D<sub>6</sub>44.38  
43.85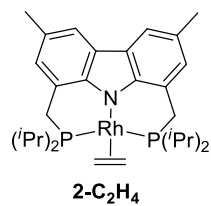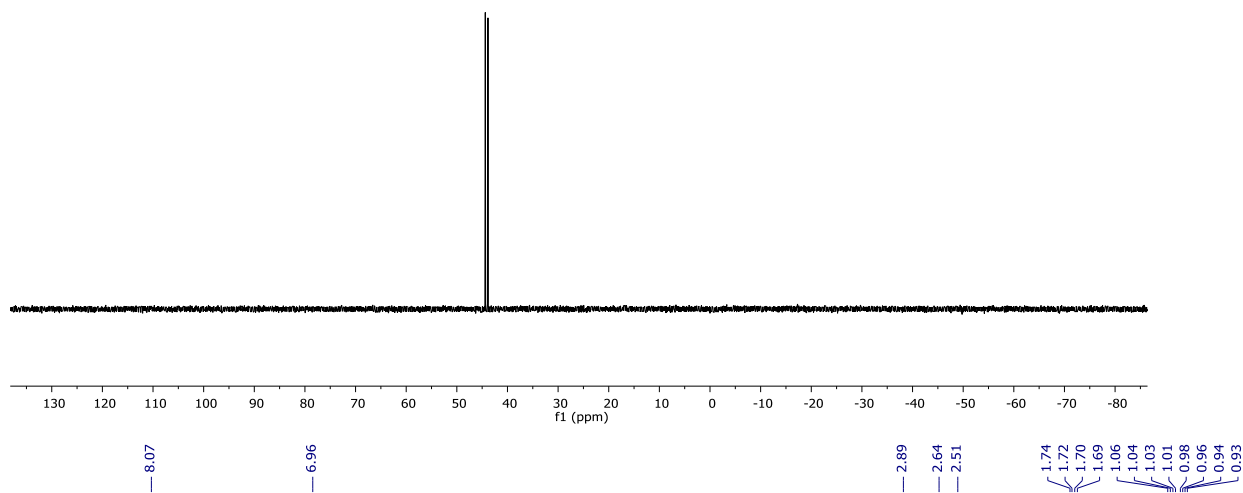In C<sub>6</sub>D<sub>6</sub>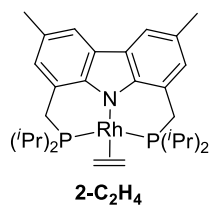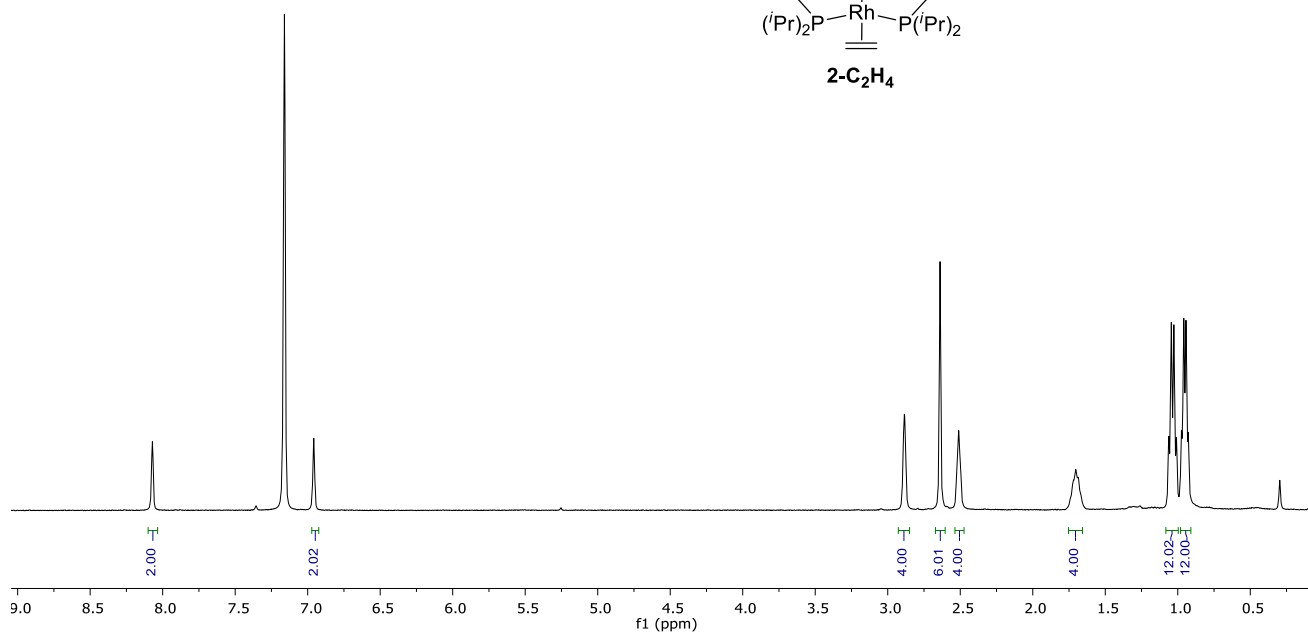

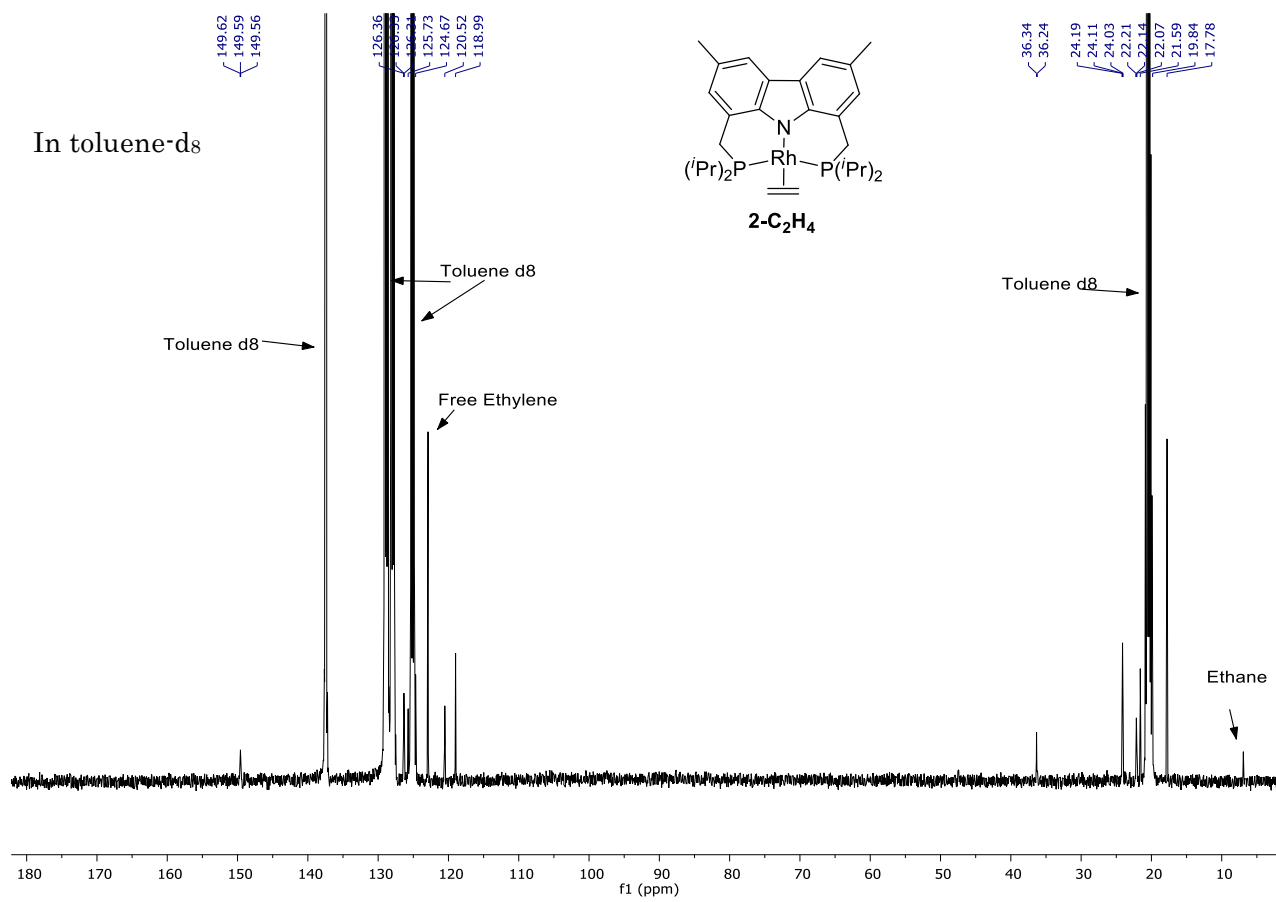

In  $C_6D_6$ 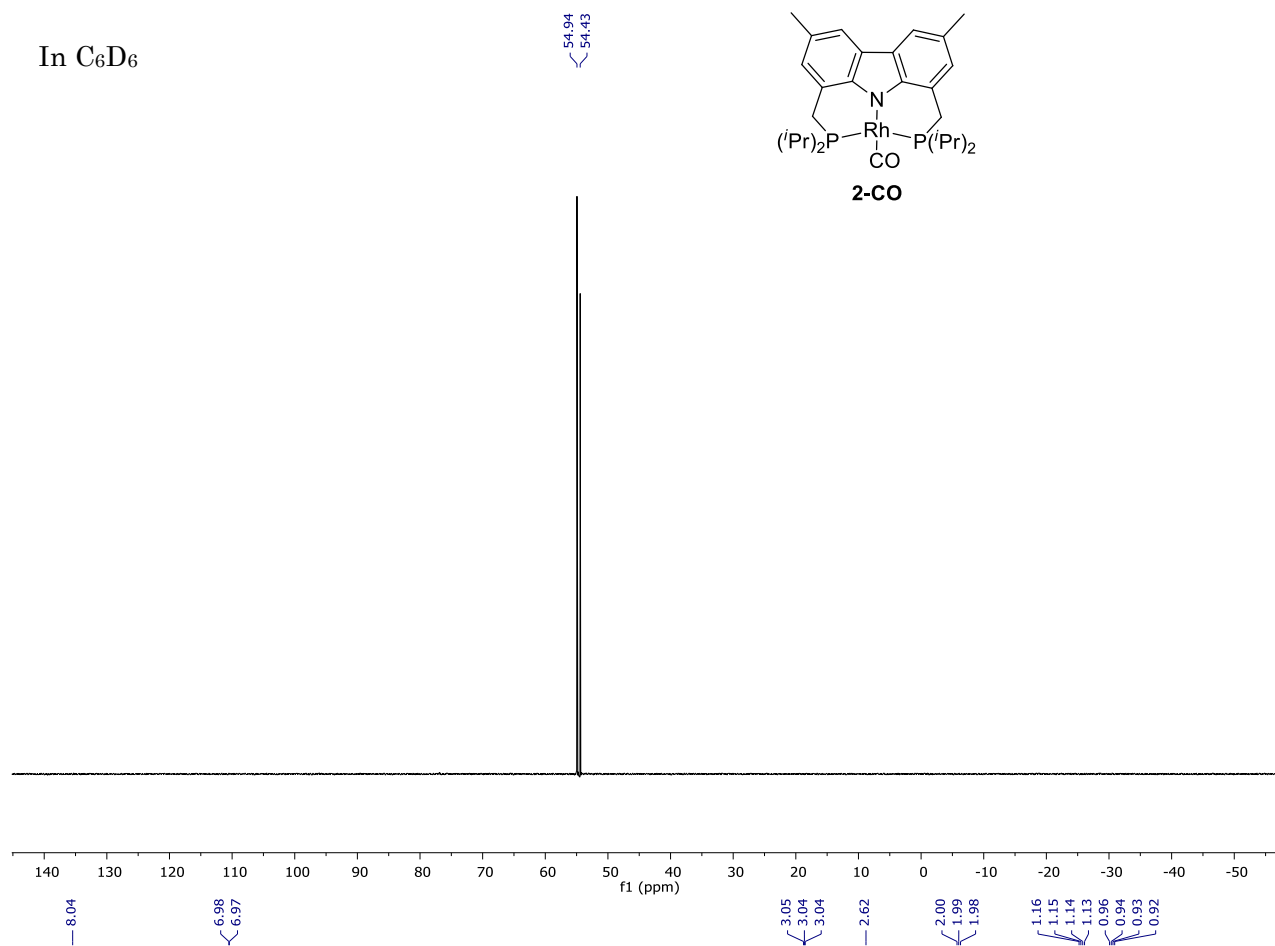In  $C_6D_6$ 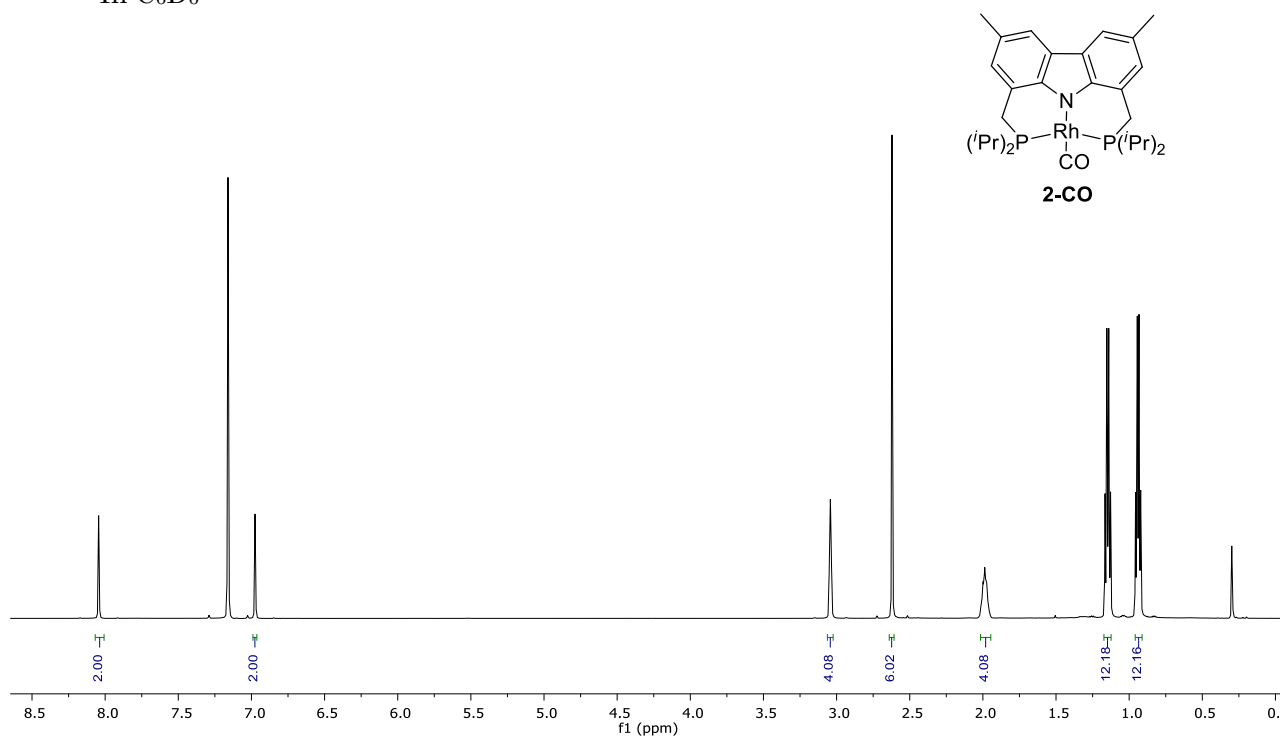



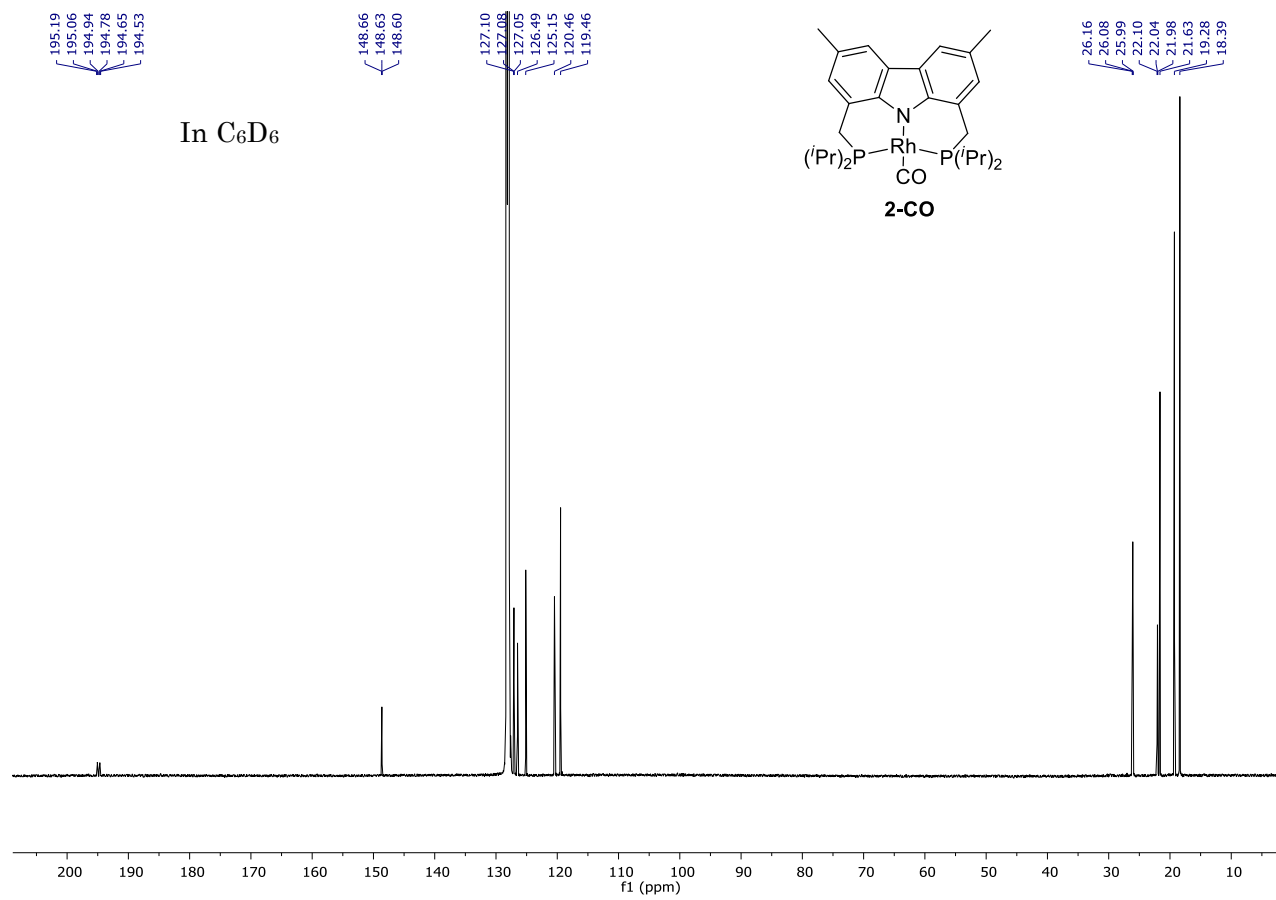

In C<sub>6</sub>D<sub>6</sub>66.07  
65.32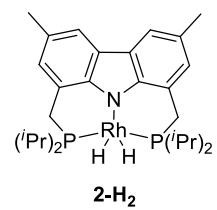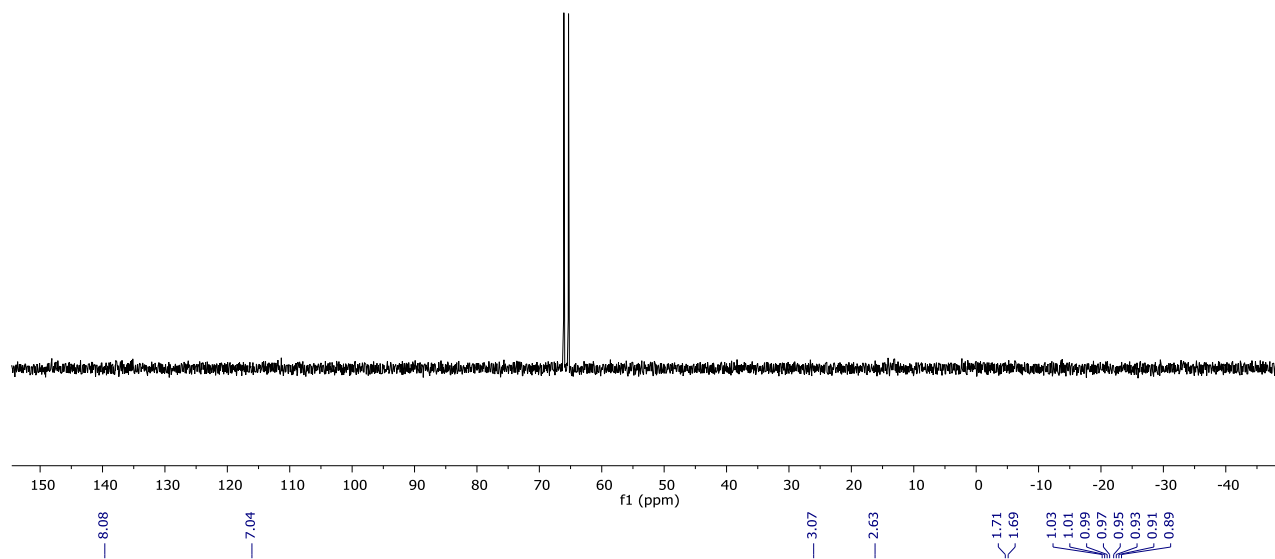In C<sub>6</sub>D<sub>6</sub>-19.63  
-19.67  
-19.71  
-19.75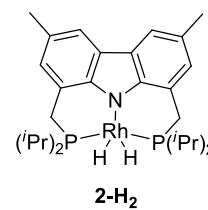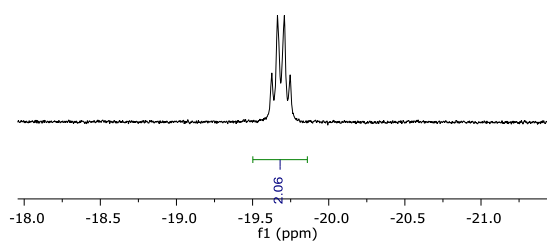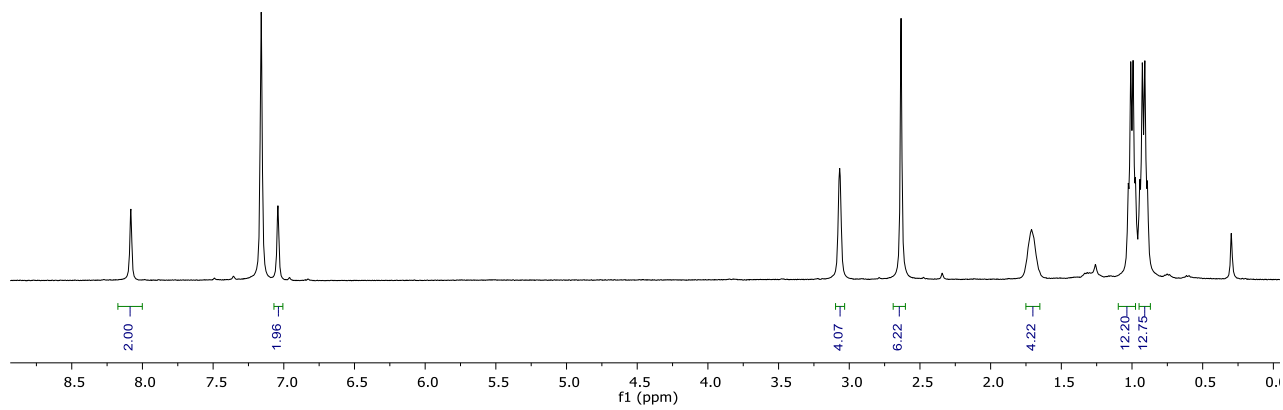

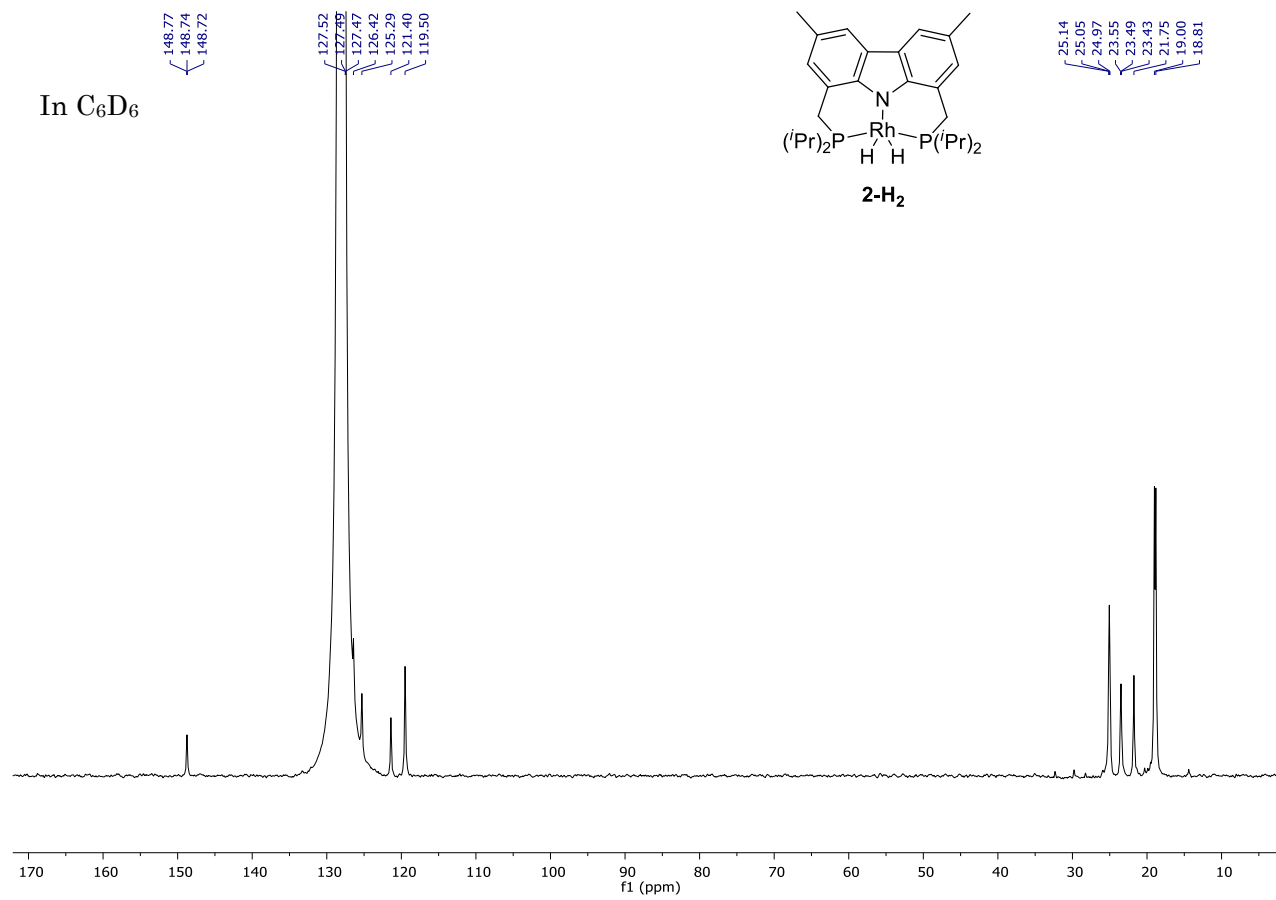

In toluene-d<sub>8</sub>

27.71  
26.84  
25.57  
24.71

14.73  
13.93  
12.59  
11.78

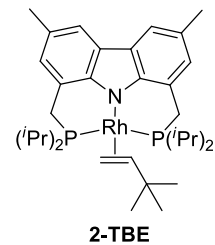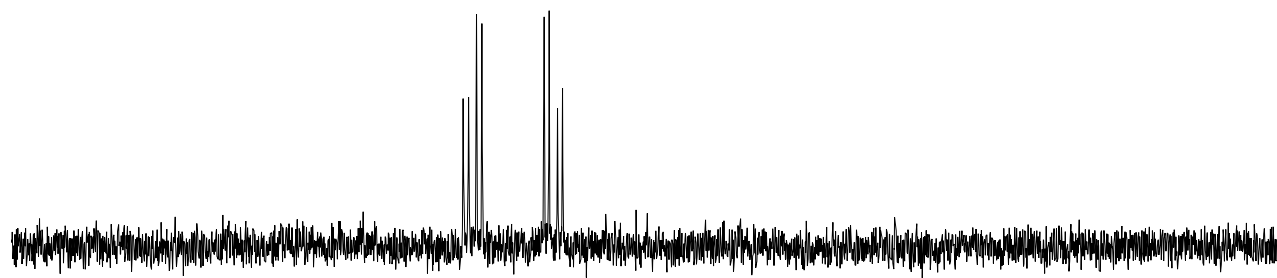

00 90 80 70 60 50 40 30 20 10 0 -10 -20 -30 -40 -50 -60 -70 -80 -90 -100  
f1 (ppm)

85.43  
84.84  
84.56  
84.23  
83.83  
83.41  
82.88

In toluene-d<sub>8</sub> at -88 °C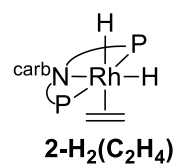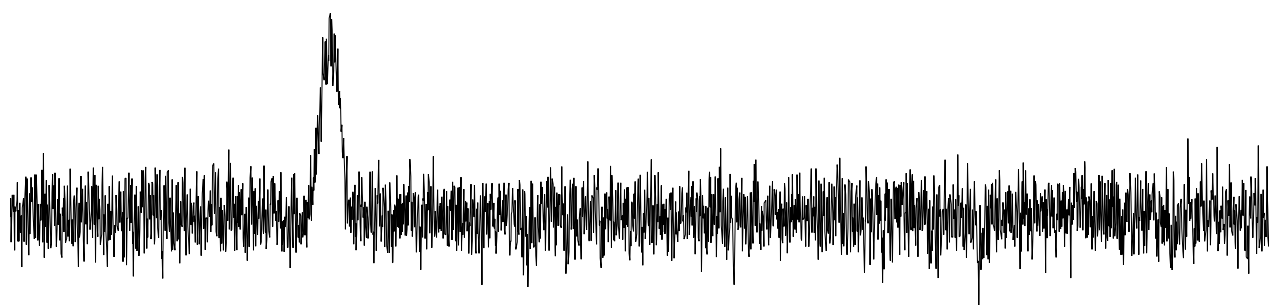

98 96 94 92 90 88 86 84 82 80 78 76 74 72 70 68 66 64 62 60 58 56 54 52 50 48 46 44 42  
f1 (ppm)

#### 4) References

(S1) Cheng, C.; Kim, B. G.; Guironnet, D.; Brookhart, M.; Guan, C.; Wang, D. Y.; Krogh-Jespersen, K.; Goldman, A. S. *J. Am. Chem. Soc.* 2014, **136**, 6672-6683.

(S2) R. Cramer, J. A. McCleverty and J. Bray, *Inorg. Synth.*, 2007, 14.

**5) Computational Details.** All electronic structure calculations employed the DFT method<sup>1</sup> and the M06-L<sup>2</sup> functional. The electronic environment was modeled using the following scheme: for Rh, we applied the SDD relativistic effective (small) core potential and the associated (6s5p3d) valence basis set,<sup>3</sup> augmented with an f-type function and a complete set of diffuse spdf functions;<sup>4</sup> all-electron 6-311G(d,p) basis sets were applied to all other atoms.<sup>5</sup> Reactant, transition state and product geometries were fully optimized and characterized by normal mode analysis. Expanded integration grid sizes (pruned (99,590) atomic grids invoked using the integral=ultrafine keyword) were applied to increase numerical accuracy and stability in both geometry optimizations and normal mode analysis.<sup>6</sup> The (unscaled) vibrational frequencies formed the basis for the calculation of vibrational zero-point energy (ZPE) corrections; standard thermodynamic corrections (based on the harmonic oscillator/rigid rotor approximations and ideal gas behavior) were made to convert from purely electronic energies (E) to (standard) enthalpies (H) and Gibbs free energies (G; P = 1 atm, T = 298 K).<sup>7</sup> All calculations were executed using the GAUSSIAN 09 series of computer programs.<sup>8</sup>

1. W. Koch and M. C. Holthausen, *A Chemist's Guide to Density Functional Theory*, Wiley, New York, 2001.
2. Y. Zhao and D. G. Truhlar, *J. Chem. Phys.*, 2006, **125**, 194101/194101-194101/194118.
3. D. Andrae, U. Haeussermann, M. Dolg, H. Stoll and H. Preuss, *Theor. Chim. Acta*, 1990, **77**, 123-141.
4. M. A. Iron, A. C. B. Lucassen, H. Cohen, M. E. van der Boom and J. M. L. Martin, *J. Am. Chem. Soc.*, 2004, **126**, 11699-11710.
5. (a) R. Ditchfield, W. J. Hehre and J. A. Pople, *J. Chem. Phys.* 1971, **54**, 724-728. (b) P. C. Hariharan and J. A. Pople, *Molecular Physics* 1974, **27**, 209-214. (c) K. Raghavachari, J. S. Binkley, R. Seeger and J. A. Pople, *J. Chem. Phys.* 1980, **72**, 650-654. (d) A. D. McLean and G. S. Chandler, *J. Chem. Phys.* 1980, **72**, 5639-5648
6. Æ. Frisch, M. J. Frisch, F. R. Clemente and G. W. Trucks, *Gaussian 09 User's Reference*, 147.
7. D. A. McQuarrie, *Statistical Thermodynamics*, Harper and Row, New York, 1973.
8. M. J. Frisch, G. W. Trucks, H. B. Schlegel, G. E. Scuseria, M. A. Robb, J. R. Cheeseman, G. Scalmani, V. Barone, B. Mennucci, G. A. Petersson, H. Nakatsuji, M. Caricato, X. Li, H. P. Hratchian, A. F. Izmaylov, J. Bloino, G. Zheng, J. L. Sonnenberg, M. Hada, M. Ehara, K. Toyota, R. Fukuda, J. Hasegawa, M. Ishida, T. Nakajima, Y. Honda, O. Kitao, H. Nakai, T. Vreven, J. J. A. Montgomery and J. E. O. Peralta, F.; Bearpark, M.; Heyd, J. J.; Brothers, E.; Kudin, K. N.; Staroverov, V. N.; Kobayashi, R.; Normand, J.; Raghavachari, K.; Rendell, A.; Burant, J. C.; Iyengar, S. S.; Tomasi, J.; Cossi, M.; Rega, N.; Millam, N. J.; Klene, M.; Knox, J. E.; Cross, J. B.; Bakken, V.; Adamo, C.; Jaramillo, J.; Gomperts, R.; Stratmann, R. E.; Yazyev, O.; Austin, A. J.; Cammi, R.; Pomelli, C.; Ochterski, J. W.; Martin, R. L.; Morokuma, K.; Zakrzewski, V. G.; Voth, G. A.; Salvador, P.; Dannenberg, J. J.; Dapprich, S.; Daniels, A. D.; Farkas, Ö.; Foresman, J. B.; Ortiz, J. V.; Cioslowski, J.; Fox, D. J., *Gaussian 09*, Revision D.01, Gaussian, Inc., Wallingford, CT, 2009.

### 6) Assessment of “Phosphine Sterics” Model: <sup>tBu2Me2</sup>PNP vs. <sup>iPr4</sup>PNP

In an attempt to avoid the severe computational problem of multiple conformers of similar energies associated with the use of multiple *i*-Pr groups on the P atoms (viz. <sup>iPr4</sup>PNP), we propose here to use the conformationally much simpler C<sub>2</sub> symmetric <sup>tBu2Me2</sup>PNP ligand which bears two Me<sup>t</sup>BuP groups (for reasons explained in the main body of the paper) as our model pincer ligand. We have carried out a few calculations using the methodology outlined above in the Computational Details section to partially assess how well <sup>tBu2Me2</sup>PNP mimics <sup>iPr4</sup>PNP in (PNP)Rh complexes.

A comparison of the two ligand models involving the lowest-energy conformers for the species (<sup>R4</sup>PNP)Rh, (<sup>R4</sup>PNP)RhH<sub>2</sub>, and *cis*-(<sup>R4</sup>PNP)RhH<sub>2</sub>(C<sub>2</sub>H<sub>4</sub>) follows (E = potential energy; H = enthalpy at T = 298 K; G = free energy at T = 298 K and P = 1 atm; all energies in kcal/mol):

|                                                                                                                                                                           | $\Delta E$ | $\Delta H$ | $\Delta G$ |
|---------------------------------------------------------------------------------------------------------------------------------------------------------------------------|------------|------------|------------|
| (a) ( <sup>tBu2Me2</sup> PNP)Rh + H <sub>2</sub> → ( <sup>tBu2Me2</sup> PNP)RhH <sub>2</sub>                                                                              | -35.6      | -33.7      | -24.8      |
| (b) ( <sup>iPr4</sup> PNP)Rh + H <sub>2</sub> → ( <sup>iPr4</sup> PNP)RhH <sub>2</sub>                                                                                    | -35.6      | -33.6      | -24.7      |
| (c) ( <sup>tBu2Me2</sup> PNP)Rh + H <sub>2</sub> + C <sub>2</sub> H <sub>4</sub> → <i>cis</i> -( <sup>tBu2Me2</sup> PNP)RhH <sub>2</sub> (C <sub>2</sub> H <sub>4</sub> ) | -47.6      | -43.5      | -20.9      |
| (d) ( <sup>iPr4</sup> PNP)Rh + H <sub>2</sub> + C <sub>2</sub> H <sub>4</sub> → <i>cis</i> -( <sup>iPr4</sup> PNP)RhH <sub>2</sub> (C <sub>2</sub> H <sub>4</sub> )       | -49.6      | -45.4      | -22.3      |

Examination of the reaction energies obtained for the addition of H<sub>2</sub> to (PNP)Rh, reactions (a) and (b), shows that the purely electronic environments around Rh in (<sup>tBu2Me2</sup>PNP)Rh and (<sup>iPr4</sup>PNP)Rh are extremely similar. Furthermore, a comparison of the energies obtained with the two model phosphines reveals a difference in formation energy for the 6-coordinate *cis*-(PNP)RhH<sub>2</sub>(C<sub>2</sub>H<sub>4</sub>) species of 2 kcal/mol or less (cf. reactions (c) and (d)), which is certainly satisfactory.

To illustrate further the importance of phosphine bulk, we collect below the computed formation energies (kcal/mol) of the species *cis*-(PNP)RhH<sub>2</sub>(C<sub>2</sub>H<sub>4</sub>) with varying phosphino alkyl groups. The values calculated for (<sup>tBu2Me2</sup>PNP)Rh are found to be in much better agreement with those obtained for (<sup>iPr4</sup>PNP)Rh than values calculated for either (<sup>Me4</sup>PNP)Rh or (<sup>tBu4</sup>PNP)Rh.

|                                                                                                                                                                           | $\Delta E$ | $\Delta H$ | $\Delta G$ |
|---------------------------------------------------------------------------------------------------------------------------------------------------------------------------|------------|------------|------------|
| (e) ( <sup>Me4</sup> PNP)Rh + H <sub>2</sub> + C <sub>2</sub> H <sub>4</sub> → <i>cis</i> -( <sup>Me4</sup> PNP)RhH <sub>2</sub> (C <sub>2</sub> H <sub>4</sub> )         | -51.3      | -47.5      | -25.4      |
| (f) ( <sup>iPr4</sup> PNP)Rh + H <sub>2</sub> + C <sub>2</sub> H <sub>4</sub> → <i>cis</i> -( <sup>iPr4</sup> PNP)RhH <sub>2</sub> (C <sub>2</sub> H <sub>4</sub> )       | -49.6      | -45.4      | -22.3      |
| (g) ( <sup>tBu2Me2</sup> PNP)Rh + H <sub>2</sub> + C <sub>2</sub> H <sub>4</sub> → <i>cis</i> -( <sup>tBu2Me2</sup> PNP)RhH <sub>2</sub> (C <sub>2</sub> H <sub>4</sub> ) | -47.6      | -43.5      | -20.9      |
| (h) ( <sup>tBu4</sup> PNP)Rh + H <sub>2</sub> + C <sub>2</sub> H <sub>4</sub> → <i>cis</i> -( <sup>tBu4</sup> PNP)RhH <sub>2</sub> (C <sub>2</sub> H <sub>4</sub> )       | -40.8      | -35.6      | -11.9      |

## 7) STRUCTURES AND ENERGIES FOR COMPUTATIONAL MODEL SPECIES

2'

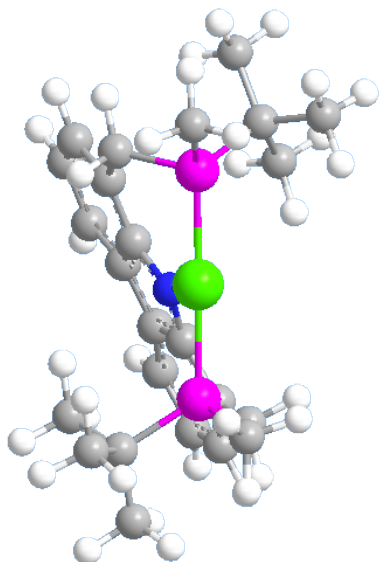

|   |             |             |             |
|---|-------------|-------------|-------------|
| C | -2.54270600 | 3.56827800  | -1.57655800 |
| C | -2.87873400 | 2.22759100  | -1.79773300 |
| C | -2.10305000 | 1.16422500  | -1.34393900 |
| C | -0.93032900 | 1.47230800  | -0.61672700 |
| C | -0.59745800 | 2.83808100  | -0.38916700 |
| C | -1.39593300 | 3.87662400  | -0.86929600 |
| H | -3.18712800 | 4.35408700  | -1.95538600 |
| H | -3.78712100 | 1.99325000  | -2.34810200 |
| H | -1.12088400 | 4.90939600  | -0.67553600 |
| C | 0.93038100  | 1.47222200  | 0.61676000  |
| C | 2.10305700  | 1.16402700  | 1.34399900  |
| C | 2.87882700  | 2.22731900  | 1.79781800  |
| C | 2.54292300  | 3.56803800  | 1.57664600  |
| C | 1.39619000  | 3.87649200  | 0.86936700  |
| C | 0.59763100  | 2.83802600  | 0.38921300  |
| H | 3.78718000  | 1.99289200  | 2.34820700  |
| H | 3.18740700  | 4.35378600  | 1.95549500  |
| H | 1.12123500  | 4.90929200  | 0.67561500  |
| N | -0.00001000 | 0.64520700  | 0.00001400  |
| C | 2.56768200  | -0.23310300 | 1.63566100  |
| H | 1.99106600  | -0.67586400 | 2.46002200  |
| H | 3.61803800  | -0.22610300 | 1.94886000  |
| C | -2.56780700 | -0.23285600 | -1.63562600 |
| H | -3.61819100 | -0.22576200 | -1.94873200 |
| H | -1.99130400 | -0.67560400 | -2.46007400 |
| P | 2.28093600  | -1.36950400 | 0.23050100  |
| P | -2.28102000 | -1.36938800 | -0.23058100 |
| C | 3.43090500  | -0.82481600 | -1.15786100 |
| C | 3.04840700  | -2.91796500 | 0.85081200  |



|    |             |             |             |
|----|-------------|-------------|-------------|
| C  | -3.04858500 | -2.91776100 | -0.85099200 |
| C  | -3.43089700 | -0.82481400 | 1.15790600  |
| Rh | -0.00004800 | -1.37918000 | -0.00005700 |
| C  | -2.77553800 | 0.32118100  | 1.93333900  |
| H  | -1.76617000 | 0.05699100  | 2.26330200  |
| H  | -2.70235800 | 1.23379300  | 1.33757700  |
| H  | -3.37789200 | 0.55089600  | 2.81952800  |
| C  | -4.78706700 | -0.37523100 | 0.61903500  |
| H  | -5.27786800 | -1.14646000 | 0.01630700  |
| H  | -5.45962600 | -0.14308800 | 1.45236500  |
| H  | -4.69850600 | 0.53067500  | 0.01240000  |
| C  | 2.77568200  | 0.32140100  | -1.93308500 |
| H  | 1.76629000  | 0.05738400  | -2.26311400 |
| H  | 2.70259200  | 1.23390500  | -1.33714600 |
| H  | 3.37807300  | 0.55122300  | -2.81922000 |
| C  | 4.78711300  | -0.37548400 | -0.61887800 |
| H  | 5.27782300  | -1.14688900 | -0.01630100 |
| H  | 5.45970900  | -0.14324000 | -1.45215000 |
| H  | 4.69863400  | 0.53030600  | -0.01205700 |
| H  | 4.12927600  | -2.81294300 | 0.98477300  |
| H  | -4.12945800 | -2.81268800 | -0.98487700 |
| C  | -3.60292400 | -2.02192800 | 2.09620600  |
| H  | -4.16064800 | -1.71464000 | 2.98708600  |
| H  | -4.15840700 | -2.84115100 | 1.63119600  |
| H  | -2.63601500 | -2.41089300 | 2.43297200  |
| C  | 3.60281400  | -2.02177200 | -2.09638400 |
| H  | 4.16058000  | -1.71437500 | -2.98719900 |
| H  | 4.15820500  | -2.84114100 | -1.63152400 |
| H  | 2.63586800  | -2.41057100 | -2.43323600 |
| H  | -2.60413600 | -3.16300000 | -1.81768000 |
| H  | -2.86102400 | -3.75025700 | -0.17138900 |
| H  | 2.60388900  | -3.16327600 | 1.81745000  |
| H  | 2.86085800  | -3.75039100 | 0.17112000  |

Sum of electronic and thermal Energies= -1782.781081  
Sum of electronic and thermal Enthalpies= -1782.780137  
Sum of electronic and thermal Free Energies= -1782.870445

-----  
**2'-H<sub>2</sub>**  
 -----

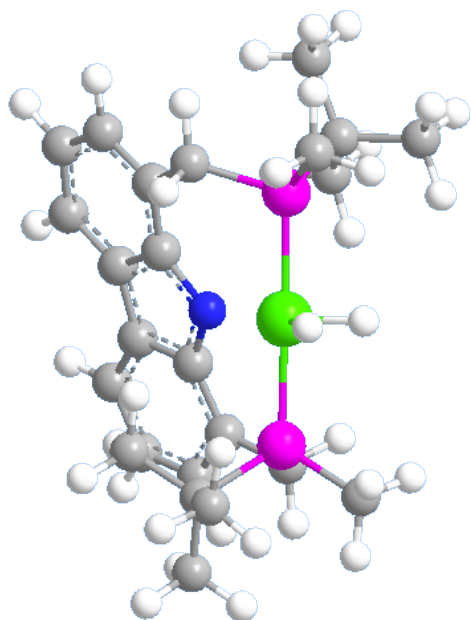

|   |             |             |             |
|---|-------------|-------------|-------------|
| C | -2.65571500 | 3.69767700  | -1.38460900 |
| C | -2.98551900 | 2.35659100  | -1.60918500 |
| C | -2.16681600 | 1.29817500  | -1.22079800 |
| C | -0.96748200 | 1.61221500  | -0.54206600 |
| C | -0.62910000 | 2.97861600  | -0.33864500 |
| C | -1.46485000 | 4.01433800  | -0.75692000 |
| H | -3.33332700 | 4.47927900  | -1.71093800 |
| H | -3.91573500 | 2.11917400  | -2.12062200 |
| H | -1.18444500 | 5.04929800  | -0.58342600 |
| C | 0.96748200  | 1.61230500  | 0.54200300  |
| C | 2.16687400  | 1.29838800  | 1.22068900  |
| C | 2.98547000  | 2.35689100  | 1.60907000  |
| C | 2.65551300  | 3.69794400  | 1.38453100  |
| C | 1.46459800  | 4.01448400  | 0.75687300  |
| C | 0.62895600  | 2.97867600  | 0.33859900  |
| H | 3.91573000  | 2.11956700  | 2.12046900  |
| H | 3.3304800   | 4.47961400  | 1.71085500  |
| H | 1.18407700  | 5.04941500  | 0.58339700  |
| N | 0.00003600  | 0.77150400  | -0.00003100 |
| C | 2.59261800  | -0.09513500 | 1.58558500  |
| H | 2.01585700  | -0.45518500 | 2.45049500  |
| H | 3.64555900  | -0.10084000 | 1.88992400  |
| C | -2.59238000 | -0.09540100 | -1.58568300 |
| H | -3.64526200 | -0.10121200 | -1.89022600 |
| H | -2.01541200 | -0.45548600 | -2.45044000 |
| P | 2.27601300  | -1.35572300 | 0.29870500  |
| P | -2.27591300 | -1.35583400 | -0.29860700 |

|    |             |             |             |
|----|-------------|-------------|-------------|
| C  | 3.38461600  | -0.94890000 | -1.16313200 |
| C  | 3.03180500  | -2.84636500 | 1.03917500  |
| C  | -3.03157400 | -2.84658900 | -1.03898400 |
| C  | -3.38470300 | -0.94884900 | 1.16303900  |
| Rh | 0.00005000  | -1.37096400 | 0.00010900  |
| C  | -2.70947800 | 0.12732100  | 2.01655200  |
| H  | -1.70812300 | -0.18091000 | 2.33230100  |
| H  | -2.61063500 | 1.07574000  | 1.48352400  |
| H  | -3.31041300 | 0.30943400  | 2.91453600  |
| C  | -4.75368400 | -0.45684700 | 0.69715100  |
| H  | -5.25634400 | -1.17264900 | 0.03857200  |
| H  | -5.40689800 | -0.30428300 | 1.56338700  |
| H  | -4.68019500 | 0.50022800  | 0.17279600  |
| C  | 2.70925000  | 0.12711700  | -2.01672300 |
| H  | 1.70788500  | -0.18121600 | -2.33234100 |
| H  | 2.61039400  | 1.07559900  | -1.48381100 |
| H  | 3.31009400  | 0.30915000  | -2.91478400 |
| C  | 4.75363200  | -0.45676900 | -0.69748100 |
| H  | 5.25639900  | -1.17244400 | -0.03884700 |
| H  | 5.40673800  | -0.30431900 | -1.56382000 |
| H  | 4.68017200  | 0.50038900  | -0.17327300 |
| H  | 4.11446100  | -2.74917000 | 1.15962200  |
| H  | -4.11422100 | -2.74944400 | -1.15955900 |
| C  | -3.53224200 | -2.22577800 | 1.99402500  |
| H  | -4.06338000 | -1.99958300 | 2.92446700  |
| H  | -4.10358600 | -2.99881800 | 1.47267300  |
| H  | -2.55764800 | -2.64492300 | 2.26521900  |
| C  | 3.53211700  | -2.22594200 | -1.99395000 |
| H  | 4.06313400  | -1.99985700 | -2.92448800 |
| H  | 4.10355900  | -2.99888000 | -1.47255400 |
| H  | 2.55750900  | -2.64517100 | -2.26496500 |
| H  | -2.58360900 | -3.00685300 | -2.02160600 |
| H  | -2.81652200 | -3.72398900 | -0.42777700 |
| H  | 2.58395200  | -3.00653300 | 2.02186400  |
| H  | 2.81671600  | -3.72384300 | 0.42809300  |
| H  | 0.12033100  | -2.78508400 | -0.65722900 |
| H  | -0.12020200 | -2.78498000 | 0.65767500  |

Sum of electronic and thermal Energies= -1783.993521  
Sum of electronic and thermal Enthalpies= -1783.992577  
Sum of electronic and thermal Free Energies= -1784.083966

-----  
**TS-2'-H<sub>2</sub>-2'-H<sub>2</sub>(C<sub>2</sub>H<sub>4</sub>)**  
 -----

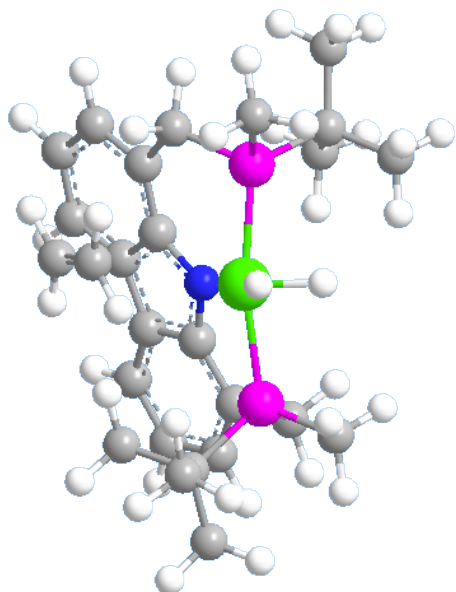

|   |             |             |             |
|---|-------------|-------------|-------------|
| C | 2.41770600  | 4.05316200  | 1.02293500  |
| C | 2.94306800  | 2.76558200  | 1.16016000  |
| C | 2.26507600  | 1.61383100  | 0.75890800  |
| C | 0.98946800  | 1.78010800  | 0.17196100  |
| C | 0.46491200  | 3.10138100  | 0.02688000  |
| C | 1.16788200  | 4.22573300  | 0.45358400  |
| H | 2.99602000  | 4.90787400  | 1.35726900  |
| H | 3.92818400  | 2.64497400  | 1.60593000  |
| H | 0.74188500  | 5.21780500  | 0.33351200  |
| C | -0.97797500 | 1.55860700  | -0.81294200 |
| C | -2.13041200 | 1.09117600  | -1.48224100 |
| C | -3.08353300 | 2.03309100  | -1.86050100 |
| C | -2.92936700 | 3.40452400  | -1.61990000 |
| C | -1.78487100 | 3.87188100  | -0.99714600 |
| C | -0.81029700 | 2.95401000  | -0.60241200 |
| H | -3.97579200 | 1.68210900  | -2.37480900 |
| H | -3.70366100 | 4.09459200  | -1.93766700 |
| H | -1.64286100 | 4.93476500  | -0.82286700 |
| N | 0.09523300  | 0.83775200  | -0.31549900 |
| C | -2.35904400 | -0.35672300 | -1.79577200 |
| H | -1.61327100 | -0.72601100 | -2.51390700 |
| H | -3.34425300 | -0.49944200 | -2.25357000 |
| C | 2.95967400  | 0.30414700  | 1.04707900  |
| H | 4.04014600  | 0.42096000  | 0.89777600  |
| H | 2.83944300  | 0.05797900  | 2.11185700  |
| P | -2.14727600 | -1.45229500 | -0.33621000 |
| P | 2.38878200  | -1.20774300 | 0.19068100  |
| C | -3.53547100 | -1.02164400 | 0.85960800  |

|                                              |             |             |              |
|----------------------------------------------|-------------|-------------|--------------|
| C                                            | -2.64667600 | -3.07934000 | -1.00566500  |
| C                                            | 3.27225900  | -2.50586700 | 1.12831100   |
| C                                            | 3.23607300  | -1.20008200 | -1.48889700  |
| C                                            | 0.24286800  | -0.54076000 | 3.21088500   |
| H                                            | 1.08276800  | -1.12006100 | 3.58523700   |
| C                                            | 0.28107100  | 0.78665200  | 3.13651500   |
| H                                            | 1.15630000  | 1.35767000  | 3.43173800   |
| H                                            | -0.63278400 | -1.11802800 | 2.92458300   |
| H                                            | -0.55172400 | 1.37077800  | 2.75520100   |
| H                                            | 0.06554200  | -2.70559300 | 0.83813400   |
| H                                            | 0.24038800  | -2.40083000 | -0.86865100  |
| C                                            | 2.80339900  | 0.06031900  | -2.23885500  |
| H                                            | 3.21559400  | 0.04156800  | -3.25365400  |
| H                                            | 1.71456100  | 0.13105800  | -2.31164300  |
| H                                            | 3.16129600  | 0.97204500  | -1.75256700  |
| C                                            | 4.75802900  | -1.22326700 | -1.34279400  |
| H                                            | 5.13673400  | -0.38629300 | -0.74947900  |
| H                                            | 5.11868200  | -2.15257500 | -0.89374800  |
| H                                            | 5.21868300  | -1.14433200 | -2.33332700  |
| C                                            | -3.15811600 | 0.23859300  | 1.63961900   |
| H                                            | -2.21104400 | 0.11085200  | 2.16790900   |
| H                                            | -3.06811700 | 1.11586300  | 0.99501900   |
| H                                            | -3.92953900 | 0.45040900  | 2.38841400   |
| C                                            | -4.85361000 | -0.78672400 | 0.12408200   |
| H                                            | -5.14643300 | -1.63437400 | -0.50294500  |
| H                                            | -5.65847000 | -0.63274900 | 0.85148200   |
| H                                            | -4.80853400 | 0.10773400  | -0.50341800  |
| H                                            | -3.70382300 | -3.11087700 | -1.28241100  |
| H                                            | 4.33121000  | -2.27339800 | 1.26637400   |
| Rh                                           | 0.09852200  | -1.28255800 | 0.16719400   |
| C                                            | 2.78816900  | -2.43544900 | -2.27101000  |
| H                                            | 1.71489100  | -2.41177000 | -2.47333300  |
| H                                            | 3.31094600  | -2.47028600 | -3.23289800  |
| H                                            | 3.01193800  | -3.36895200 | -1.74493200  |
| C                                            | -3.67191000 | -2.19501600 | 1.83303200   |
| H                                            | -4.37007700 | -1.93224300 | 2.63463600   |
| H                                            | -4.05731600 | -3.09487800 | 1.34588600   |
| H                                            | -2.71410100 | -2.44937100 | 2.29987600   |
| H                                            | 2.80124100  | -2.60869400 | 2.10728800   |
| H                                            | 3.17889100  | -3.46587000 | 0.61717700   |
| H                                            | -2.43939400 | -3.86595200 | -0.27924600  |
| H                                            | -2.04709400 | -3.28257500 | -1.89508000  |
| Sum of electronic and thermal Energies=      |             |             | -1862.536791 |
| Sum of electronic and thermal Enthalpies=    |             |             | -1862.535847 |
| Sum of electronic and thermal Free Energies= |             |             | -1862.634363 |

\*\*\*\*\* 1 imaginary frequencies (negative Signs) \*\*\*\*\*

Diagonal vibrational polarizability:

30.5052865      30.7161164      55.7953012

Harmonic frequencies (cm<sup>-1</sup>), IR intensities (KM/Mole), Raman scattering activities (A<sup>4</sup>/AMU), depolarization ratios for plane and unpolarized incident light, reduced masses (AMU), force constants (mDyne/A), and normal coordinates:

|                | 1        | 2       | 3       |
|----------------|----------|---------|---------|
|                | A        | A       | A       |
| Frequencies -- | -82.0464 | 26.7919 | 30.4092 |
| Red. masses -- | 2.7517   | 2.6107  | 4.1564  |
| Frc consts --  | 0.0109   | 0.0011  | 0.0023  |
| IR Inten --    | 5.5767   | 0.0550  | 0.2500  |

-----  
**2'-H<sub>2</sub>(C<sub>2</sub>H<sub>4</sub>)**  
 -----

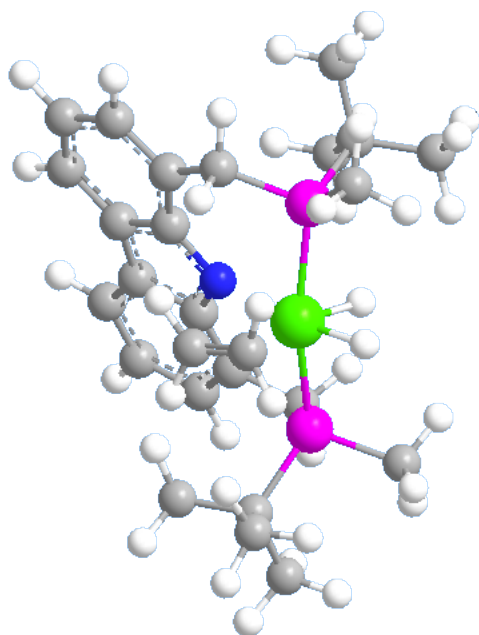

|   |            |            |            |
|---|------------|------------|------------|
| C | -3.7580000 | 2.7068000  | -1.9230000 |
| C | -3.9513000 | 1.3241000  | -2.0144000 |
| C | -3.0094000 | 0.3928000  | -1.5797000 |
| C | -1.8116000 | 0.8907000  | -1.0088000 |
| C | -1.6336000 | 2.3047000  | -0.8968000 |
| C | -2.5944000 | 3.2021000  | -1.3601000 |
| H | -4.5288000 | 3.3810000  | -2.2807000 |
| H | -4.8792000 | 0.9487000  | -2.4407000 |
| H | -2.4356000 | 4.2726000  | -1.2645000 |
| C | 0.1040000  | 1.1773000  | 0.0503000  |
| C | 1.3085000  | 1.0304000  | 0.7761000  |
| C | 1.9878000  | 2.1924000  | 1.1341000  |
| C | 1.5181000  | 3.4765000  | 0.8321000  |
| C | 0.3189000  | 3.6290000  | 0.1589000  |
| C | -0.3864000 | 2.4890000  | -0.2267000 |
| H | 2.9201000  | 2.0884000  | 1.6859000  |
| H | 2.0916000  | 4.3439000  | 1.1411000  |
| H | -0.0709000 | 4.6181000  | -0.0656000 |
| N | -0.7481000 | 0.2160000  | -0.4483000 |
| C | 1.8699000  | -0.2868000 | 1.2348000  |
| H | 1.2687000  | -0.6943000 | 2.0591000  |
| H | 2.8789000  | -0.1360000 | 1.6367000  |
| C | -3.3506000 | -1.0670000 | -1.7480000 |
| H | -4.4388000 | -1.1933000 | -1.7832000 |
| H | -2.9835000 | -1.4552000 | -2.7105000 |
| P | 1.8891000  | -1.6575000 | 0.0092000  |

|    |             |             |             |
|----|-------------|-------------|-------------|
| P  | -2.62740000 | -2.20190000 | -0.50790000 |
| C  | 3.33850000  | -1.28880000 | -1.13850000 |
| C  | 2.51110000  | -3.03870000 | 1.03560000  |
| C  | -3.32550000 | -3.81440000 | -1.01750000 |
| C  | -3.48380000 | -1.85100000 | 1.13060000  |
| Rh | -0.34550000 | -1.95800000 | -0.59800000 |
| C  | -2.89290000 | -0.61070000 | 1.80260000  |
| H  | -1.81590000 | -0.70380000 | 1.95880000  |
| H  | -3.06710000 | 0.29680000  | 1.22070000  |
| H  | -3.37110000 | -0.47880000 | 2.77960000  |
| C  | -4.98130000 | -1.62820000 | 0.90960000  |
| H  | -5.46580000 | -2.45970000 | 0.38890000  |
| H  | -5.47920000 | -1.52470000 | 1.87950000  |
| H  | -5.17390000 | -0.70950000 | 0.34860000  |
| C  | 3.17820000  | 0.11750000  | -1.72090000 |
| H  | 2.17430000  | 0.30690000  | -2.11010000 |
| H  | 3.37560000  | 0.88990000  | -0.97440000 |
| H  | 3.88880000  | 0.25720000  | -2.54320000 |
| C  | 4.67420000  | -1.36850000 | -0.39720000 |
| H  | 4.91320000  | -2.38570000 | -0.07720000 |
| H  | 5.47920000  | -1.04150000 | -1.06460000 |
| H  | 4.70350000  | -0.71700000 | 0.48130000  |
| H  | 3.40620000  | -2.76490000 | 1.59900000  |
| H  | -4.41070000 | -3.85510000 | -0.89250000 |
| C  | -3.25900000 | -3.06760000 | 2.03200000  |
| H  | -3.64730000 | -2.85620000 | 3.03350000  |
| H  | -3.77370000 | -3.95980000 | 1.66500000  |
| H  | -2.19470000 | -3.30220000 | 2.13260000  |
| C  | 3.32740000  | -2.33020000 | -2.25970000 |
| H  | 4.21030000  | -2.20190000 | -2.89530000 |
| H  | 3.35080000  | -3.35480000 | -1.87410000 |
| H  | 2.44820000  | -2.23380000 | -2.89970000 |
| H  | -3.09780000 | -3.98670000 | -2.07110000 |
| H  | -2.86560000 | -4.61810000 | -0.44160000 |
| H  | 1.72240000  | -3.32580000 | 1.73180000  |
| H  | 2.73200000  | -3.90700000 | 0.41150000  |
| H  | -0.12400000 | -3.51500000 | -0.44160000 |
| H  | -0.43350000 | -2.09420000 | 0.96950000  |
| C  | -0.16320000 | -1.36970000 | -2.85130000 |
| H  | 0.80850000  | -0.90360000 | -2.95270000 |
| C  | -0.29670000 | -2.72940000 | -2.78330000 |
| H  | 0.55940000  | -3.39110000 | -2.84390000 |
| H  | -1.00490000 | -0.71200000 | -3.03350000 |
| H  | -1.25510000 | -3.20840000 | -2.95350000 |

Sum of electronic and thermal Energies=

-1862.547490



|                                              |              |
|----------------------------------------------|--------------|
| Sum of electronic and thermal Enthalpies=    | -1862.546545 |
| Sum of electronic and thermal Free Energies= | -1862.641320 |

---

**TS-2'-H<sub>2</sub>(C<sub>2</sub>H<sub>4</sub>)-2'-H(η<sup>2</sup>-Et)**


---

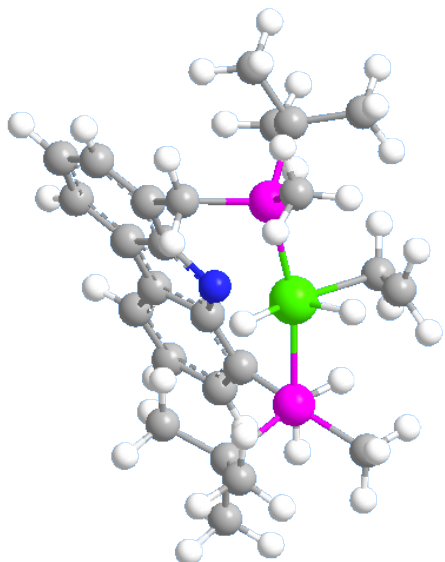

|    |             |             |             |
|----|-------------|-------------|-------------|
| C  | -2.98710000 | 2.91120000  | -2.05560000 |
| C  | -3.34110000 | 1.55910000  | -2.11010000 |
| C  | -2.53760000 | 0.53890000  | -1.60500000 |
| C  | -1.30910000 | 0.90420000  | -1.00460000 |
| C  | -0.97930000 | 2.29010000  | -0.91290000 |
| C  | -1.80150000 | 3.28110000  | -1.44740000 |
| H  | -3.65420000 | 3.65940000  | -2.47000000 |
| H  | -4.29130000 | 1.28010000  | -2.56040000 |
| H  | -1.52000000 | 4.32720000  | -1.36560000 |
| C  | 0.56310000  | 1.01450000  | 0.17550000  |
| C  | 1.71080000  | 0.77730000  | 0.96880000  |
| C  | 2.48780000  | 1.87500000  | 1.33100000  |
| C  | 2.17000000  | 3.18930000  | 0.96860000  |
| C  | 1.03260000  | 3.43450000  | 0.22160000  |
| C  | 0.23400000  | 2.35860000  | -0.16730000 |
| H  | 3.37560000  | 1.69220000  | 1.93280000  |
| H  | 2.81240000  | 4.00470000  | 1.28300000  |
| H  | 0.76040000  | 4.44720000  | -0.06210000 |
| N  | -0.35350000 | 0.13230000  | -0.36820000 |
| C  | 2.14570000  | -0.58150000 | 1.43420000  |
| H  | 1.49100000  | -0.96470000 | 2.22540000  |
| H  | 3.15910000  | -0.52990000 | 1.84720000  |
| C  | -3.05650000 | -0.86790000 | -1.71820000 |
| H  | -4.15040000 | -0.85900000 | -1.78420000 |
| H  | -2.70560000 | -1.34190000 | -2.64390000 |
| P  | 2.05210000  | -1.84550000 | 0.11580000  |
| P  | -2.51410000 | -2.00560000 | -0.39430000 |
| Rh | -0.21110000 | -2.02580000 | -0.39820000 |
| C  | -0.09010000 | -2.50130000 | -2.54850000 |

|   |             |             |             |
|---|-------------|-------------|-------------|
| H | 0.79860000  | -2.11800000 | -3.03770000 |
| C | 0.01160000  | -3.72830000 | -1.80910000 |
| H | 0.97770000  | -4.23420000 | -1.79080000 |
| H | -0.80320000 | -4.44720000 | -1.90100000 |
| H | -1.00120000 | -2.32230000 | -3.11230000 |
| H | -0.30720000 | -2.03180000 | 1.22310000  |
| H | -0.12930000 | -3.66520000 | -0.39220000 |
| C | 2.75700000  | -3.32140000 | 0.93390000  |
| H | 2.67170000  | -4.20130000 | 0.29410000  |
| H | 3.80610000  | -3.18460000 | 1.20910000  |
| H | 2.17610000  | -3.51010000 | 1.83870000  |
| C | -3.33150000 | -3.56210000 | -0.90400000 |
| H | -3.00620000 | -4.39190000 | -0.27450000 |
| H | -4.42110000 | -3.48910000 | -0.85990000 |
| H | -3.05060000 | -3.78510000 | -1.93610000 |
| C | 3.35290000  | -1.35000000 | -1.15480000 |
| C | 2.82160000  | -0.19300000 | -2.00890000 |
| H | 1.80540000  | -0.37300000 | -2.36860000 |
| H | 2.80780000  | 0.74700000  | -1.45400000 |
| H | 3.47380000  | -0.05540000 | -2.87860000 |
| C | 3.61580000  | -2.56800000 | -2.04470000 |
| H | 4.32750000  | -2.30030000 | -2.83290000 |
| H | 4.04900000  | -3.40450000 | -1.48840000 |
| H | 2.70660000  | -2.92140000 | -2.53910000 |
| C | 4.65490000  | -0.91720000 | -0.48040000 |
| H | 5.40970000  | -0.70560000 | -1.24610000 |
| H | 4.52190000  | -0.00120000 | 0.10150000  |
| H | 5.07110000  | -1.68810000 | 0.17540000  |
| C | -3.41590000 | -1.50340000 | 1.17580000  |
| C | -2.74000000 | -0.28540000 | 1.80850000  |
| H | -1.68140000 | -0.46910000 | 2.00610000  |
| H | -2.81550000 | 0.60290000  | 1.17660000  |
| H | -3.23510000 | -0.06100000 | 2.75970000  |
| C | -3.33500000 | -2.68500000 | 2.14470000  |
| H | -2.29750000 | -2.99060000 | 2.31200000  |
| H | -3.75610000 | -2.39360000 | 3.11230000  |
| H | -3.90010000 | -3.55300000 | 1.79230000  |
| C | -4.87670000 | -1.16530000 | 0.87310000  |
| H | -5.40970000 | -1.97940000 | 0.37220000  |
| H | -5.40500000 | -0.96740000 | 1.81180000  |
| H | -4.96430000 | -0.26510000 | 0.25850000  |

Sum of electronic and thermal Energies= -1862.532967

Sum of electronic and thermal Enthalpies= -1862.532023

Sum of electronic and thermal Free Energies= -1862.625879

\*\*\*\*\* 1 imaginary frequencies (negative Signs) \*\*\*\*\*

Diagonal vibrational polarizability:

32.6180746      28.0219513      30.5492250

Harmonic frequencies ( $\text{cm}^{-1}$ ), IR intensities (KM/Mole), Raman scattering activities ( $\text{A}^4/\text{AMU}$ ), depolarization ratios for plane and unpolarized incident light, reduced masses (AMU), force constants (mDyne/A), and normal coordinates:

|                | 1         | 2       | 3       |
|----------------|-----------|---------|---------|
|                | A         | A       | A       |
| Frequencies -- | -659.8252 | 33.3193 | 34.6080 |
| Red. masses -- | 1.2142    | 3.7997  | 4.3054  |
| Frc consts --  | 0.3114    | 0.0025  | 0.0030  |
| IR Inten --    | 4.4208    | 0.0526  | 0.4263  |

-----  
**2'-H( $\eta^2$ -Et)**  
 -----

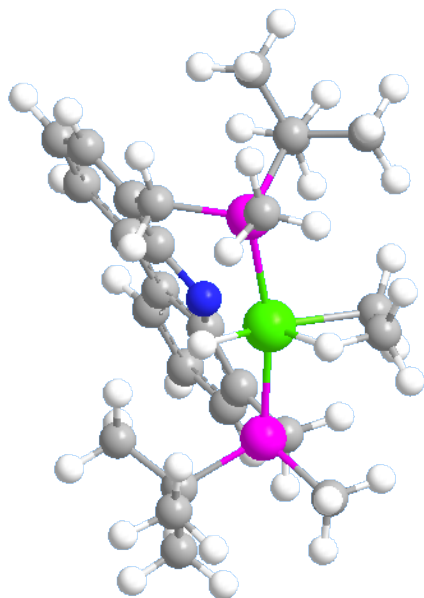

|    |             |             |             |
|----|-------------|-------------|-------------|
| C  | -2.95630000 | 2.94830000  | -2.11430000 |
| C  | -3.30940000 | 1.59600000  | -2.16660000 |
| C  | -2.51200000 | 0.57790000  | -1.64780000 |
| C  | -1.28960000 | 0.94540000  | -1.03720000 |
| C  | -0.96170000 | 2.33110000  | -0.94680000 |
| C  | -1.77820000 | 3.32020000  | -1.49360000 |
| H  | -3.61840000 | 3.69480000  | -2.53950000 |
| H  | -4.25460000 | 1.31450000  | -2.62550000 |
| H  | -1.49710000 | 4.36630000  | -1.41130000 |
| C  | 0.57590000  | 1.06590000  | 0.16360000  |
| C  | 1.72320000  | 0.83870000  | 0.96010000  |
| C  | 2.49130000  | 1.94280000  | 1.32150000  |
| C  | 2.16690000  | 3.25390000  | 0.95470000  |
| C  | 1.03260000  | 3.48850000  | 0.20010000  |
| C  | 0.24310000  | 2.40620000  | -0.18880000 |
| H  | 3.37910000  | 1.76650000  | 1.92510000  |
| H  | 2.80280000  | 4.07440000  | 1.26920000  |
| H  | 0.75590000  | 4.49780000  | -0.09130000 |
| N  | -0.33690000 | 0.18060000  | -0.38470000 |
| C  | 2.17240000  | -0.51620000 | 1.42220000  |
| H  | 1.52700000  | -0.90630000 | 2.21720000  |
| H  | 3.18980000  | -0.45760000 | 1.82420000  |
| C  | -3.03230000 | -0.82840000 | -1.75210000 |
| H  | -4.12520000 | -0.81890000 | -1.83250000 |
| H  | -2.66550000 | -1.31660000 | -2.66400000 |
| P  | 2.06840000  | -1.77010000 | 0.09720000  |
| P  | -2.49700000 | -1.93470000 | -0.40130000 |
| Rh | -0.19680000 | -1.94190000 | -0.40200000 |

|                                              |             |             |              |
|----------------------------------------------|-------------|-------------|--------------|
| C                                            | -0.08290000 | -2.50530000 | -2.49930000  |
| H                                            | 0.79860000  | -2.18290000 | -3.04680000  |
| C                                            | 0.03350000  | -3.76680000 | -1.75550000  |
| H                                            | 1.00570000  | -4.26380000 | -1.80340000  |
| H                                            | -0.76310000 | -4.49780000 | -1.91810000  |
| H                                            | -0.98540000 | -2.38870000 | -3.09690000  |
| H                                            | -0.28500000 | -1.98730000 | 1.23450000   |
| H                                            | -0.08610000 | -3.68330000 | -0.53260000  |
| C                                            | 2.77570000  | -3.25220000 | 0.90330000   |
| H                                            | 2.68500000  | -4.13040000 | 0.26190000   |
| H                                            | 3.82810000  | -3.11660000 | 1.16740000   |
| H                                            | 2.20460000  | -3.44170000 | 1.81400000   |
| C                                            | -3.29730000 | -3.50840000 | -0.88480000  |
| H                                            | -2.96930000 | -4.32410000 | -0.23860000  |
| H                                            | -4.38770000 | -3.44260000 | -0.84610000  |
| H                                            | -3.00980000 | -3.74710000 | -1.91150000  |
| C                                            | 3.36020000  | -1.27300000 | -1.18120000  |
| C                                            | 2.80380000  | -0.14250000 | -2.05400000  |
| H                                            | 1.79780000  | -0.36060000 | -2.42160000  |
| H                                            | 2.75590000  | 0.80320000  | -1.51040000  |
| H                                            | 3.46080000  | 0.00520000  | -2.91850000  |
| C                                            | 3.64290000  | -2.50120000 | -2.05080000  |
| H                                            | 4.33470000  | -2.23050000 | -2.85560000  |
| H                                            | 4.10690000  | -3.31420000 | -1.48470000  |
| H                                            | 2.73560000  | -2.88840000 | -2.52300000  |
| C                                            | 4.65470000  | -0.80580000 | -0.51590000  |
| H                                            | 5.40790000  | -0.60000000 | -1.28490000  |
| H                                            | 4.50680000  | 0.12040000  | 0.04610000   |
| H                                            | 5.08080000  | -1.55610000 | 0.15750000   |
| C                                            | -3.41350000 | -1.40820000 | 1.15230000   |
| C                                            | -2.73540000 | -0.18760000 | 1.77740000   |
| H                                            | -1.67950000 | -0.37780000 | 1.98410000   |
| H                                            | -2.80120000 | 0.69490000  | 1.13640000   |
| H                                            | -3.23570000 | 0.04950000  | 2.72290000   |
| C                                            | -3.34840000 | -2.57750000 | 2.13720000   |
| H                                            | -2.31380000 | -2.88540000 | 2.31820000   |
| H                                            | -3.77660000 | -2.27060000 | 3.09690000   |
| H                                            | -3.91530000 | -3.44700000 | 1.79140000   |
| C                                            | -4.86880000 | -1.06720000 | 0.82860000   |
| H                                            | -5.39890000 | -1.88520000 | 0.33060000   |
| H                                            | -5.40790000 | -0.85600000 | 1.75820000   |
| H                                            | -4.94500000 | -0.17430000 | 0.20190000   |
| Sum of electronic and thermal Energies=      |             |             | -1862.531757 |
| Sum of electronic and thermal Enthalpies=    |             |             | -1862.530813 |
| Sum of electronic and thermal Free Energies= |             |             | -1862.624616 |

---

**TS-2'-H( $\eta^2$ -Et)-2'-H(Et)**

---

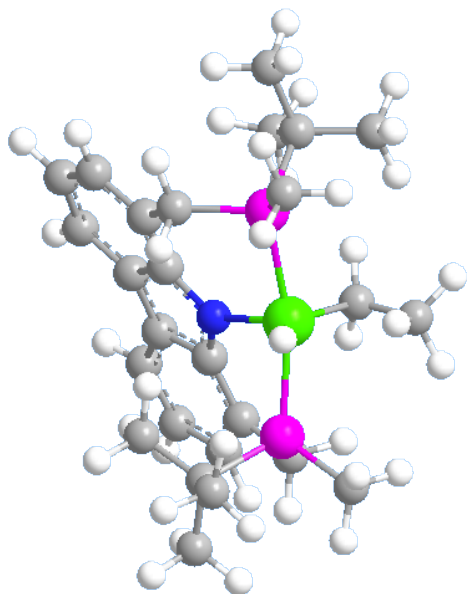

|   |             |             |             |
|---|-------------|-------------|-------------|
| C | -3.36910000 | 2.80940000  | -1.89510000 |
| C | -3.67750000 | 1.44600000  | -1.94060000 |
| C | -2.82720000 | 0.45500000  | -1.45270000 |
| C | -1.59580000 | 0.87300000  | -0.89420000 |
| C | -1.31250000 | 2.26850000  | -0.79840000 |
| C | -2.18670000 | 3.22640000  | -1.30920000 |
| H | -4.07280000 | 3.53260000  | -2.29270000 |
| H | -4.63070000 | 1.13450000  | -2.36190000 |
| H | -1.94850000 | 4.28300000  | -1.22720000 |
| C | 0.29880000  | 1.04710000  | 0.26010000  |
| C | 1.42940000  | 0.83590000  | 1.07960000  |
| C | 2.14840000  | 1.95840000  | 1.48140000  |
| C | 1.78550000  | 3.26350000  | 1.12710000  |
| C | 0.65490000  | 3.47780000  | 0.35940000  |
| C | -0.09140000 | 2.37800000  | -0.06490000 |
| H | 3.02660000  | 1.80410000  | 2.10460000  |
| H | 2.38470000  | 4.09950000  | 1.47120000  |
| H | 0.34330000  | 4.48460000  | 0.09650000  |
| N | -0.59660000 | 0.14040000  | -0.28030000 |
| C | 1.89140000  | -0.51600000 | 1.54110000  |
| H | 1.19750000  | -0.94040000 | 2.27880000  |
| H | 2.86500000  | -0.43130000 | 2.03780000  |
| C | -3.30600000 | -0.97210000 | -1.52070000 |
| H | -4.40110000 | -0.99860000 | -1.49970000 |
| H | -3.02000000 | -1.44300000 | -2.47280000 |
| P | 1.94210000  | -1.77500000 | 0.20720000  |
| P | -2.60320000 | -2.08500000 | -0.24810000 |
| C | 3.34950000  | -1.26100000 | -0.94220000 |

|    |             |             |             |
|----|-------------|-------------|-------------|
| C  | 2.63610000  | -3.21820000 | 1.09640000  |
| C  | -3.36550000 | -3.68440000 | -0.70550000 |
| C  | -3.42120000 | -1.65170000 | 1.39140000  |
| C  | -0.24030000 | -3.06960000 | -2.72310000 |
| C  | -0.17650000 | -1.60340000 | -2.48280000 |
| H  | -1.01190000 | -1.01050000 | -2.85270000 |
| H  | 0.59770000  | -3.47360000 | -3.30010000 |
| H  | 0.76290000  | -1.12720000 | -2.75510000 |
| Rh | -0.32280000 | -1.92760000 | -0.39430000 |
| H  | -0.17290000 | -3.61340000 | -1.72780000 |
| H  | -0.36350000 | -3.10310000 | 0.81450000  |
| C  | 4.68520000  | -1.15400000 | -0.20610000 |
| H  | 5.03040000  | -2.11440000 | 0.18430000  |
| H  | 5.45420000  | -0.79400000 | -0.89890000 |
| H  | 4.64290000  | -0.43920000 | 0.62120000  |
| C  | 3.03790000  | 0.09230000  | -1.59090000 |
| H  | 2.01560000  | 0.15800000  | -1.96950000 |
| H  | 3.17250000  | 0.92010000  | -0.89260000 |
| H  | 3.71920000  | 0.25360000  | -2.43410000 |
| C  | -3.33370000 | -2.88590000 | 2.29200000  |
| H  | -2.30510000 | -3.25250000 | 2.36840000  |
| H  | -3.67130000 | -2.62450000 | 3.30010000  |
| H  | -3.96630000 | -3.70490000 | 1.93890000  |
| C  | -2.67040000 | -0.49720000 | 2.05660000  |
| H  | -1.61400000 | -0.74090000 | 2.19990000  |
| H  | -2.72420000 | 0.42530000  | 1.47370000  |
| H  | -3.11540000 | -0.29930000 | 3.03810000  |
| H  | -3.13040000 | -3.90520000 | -1.74860000 |
| H  | 3.60400000  | -3.00360000 | 1.55600000  |
| C  | -4.88250000 | -1.25800000 | 1.17760000  |
| H  | -5.45420000 | -2.02740000 | 0.64840000  |
| H  | -5.36740000 | -1.10940000 | 2.14850000  |
| H  | -4.97270000 | -0.31950000 | 0.62330000  |
| C  | 3.45070000  | -2.33840000 | -2.02570000 |
| H  | 3.66710000  | -3.32740000 | -1.61020000 |
| H  | 2.53080000  | -2.41360000 | -2.61120000 |
| H  | 4.26250000  | -2.09330000 | -2.71930000 |
| H  | -2.95210000 | -4.48460000 | -0.09090000 |
| H  | -4.45370000 | -3.66990000 | -0.59380000 |
| H  | 2.73980000  | -4.07260000 | 0.42500000  |
| H  | 1.92340000  | -3.49870000 | 1.87290000  |
| H  | -1.17930000 | -3.40700000 | -3.17000000 |

Sum of electronic and thermal Energies= -1862.521497  
Sum of electronic and thermal Enthalpies= -1862.520553  
Sum of electronic and thermal Free Energies= -1862.615833



\*\*\*\*\* 1 imaginary frequencies (negative Signs) \*\*\*\*\*

Diagonal vibrational polarizability:

30.3740741      42.2710141      23.8326875

Harmonic frequencies (cm<sup>-1</sup>), IR intensities (KM/Mole), Raman scattering activities (A<sup>4</sup>/AMU), depolarization ratios for plane and unpolarized incident light, reduced masses (AMU), force constants (mDyne/A), and normal coordinates:

|                | 1         | 2       | 3       |
|----------------|-----------|---------|---------|
|                | A         | A       | A       |
| Frequencies -- | -344.0871 | 23.9471 | 45.5424 |
| Red. masses -- | 1.4492    | 3.7724  | 4.2359  |
| Frc consts --  | 0.1011    | 0.0013  | 0.0052  |
| IR Inten --    | 31.8141   | 0.2951  | 0.0845  |

-----  
**2'-H(Et)**  
 -----

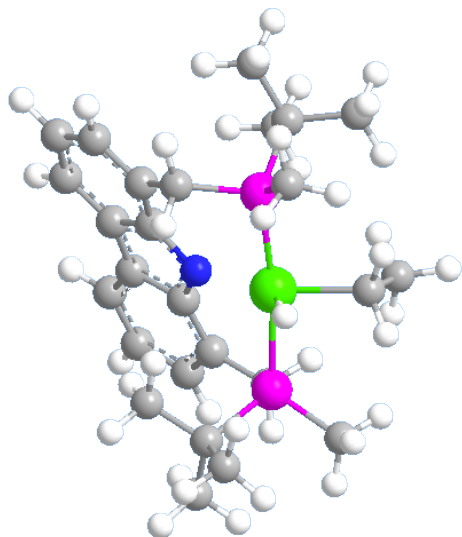

|   |             |             |             |
|---|-------------|-------------|-------------|
| C | -2.97330000 | 2.93740000  | -1.84880000 |
| C | -3.30610000 | 1.57940000  | -1.89410000 |
| C | -2.47650000 | 0.57680000  | -1.39520000 |
| C | -1.25810000 | 0.97140000  | -0.79840000 |
| C | -0.92940000 | 2.35620000  | -0.75190000 |
| C | -1.77510000 | 3.33110000  | -1.28080000 |
| H | -3.65960000 | 3.67220000  | -2.25580000 |
| H | -4.25120000 | 1.28150000  | -2.34290000 |
| H | -1.50010000 | 4.38090000  | -1.23220000 |
| C | 0.66290000  | 1.10880000  | 0.29090000  |
| C | 1.82680000  | 0.87790000  | 1.05700000  |
| C | 2.62770000  | 1.97590000  | 1.36210000  |
| C | 2.30790000  | 3.28130000  | 0.96980000  |
| C | 1.14200000  | 3.52130000  | 0.26490000  |
| C | 0.32150000  | 2.44200000  | -0.06590000 |
| H | 3.53050000  | 1.80400000  | 1.94420000  |
| H | 2.96950000  | 4.09860000  | 1.23600000  |
| H | 0.86620000  | 4.53080000  | -0.02650000 |
| N | -0.27710000 | 0.20190000  | -0.18050000 |
| C | 2.22110000  | -0.47080000 | 1.58340000  |
| H | 1.54090000  | -0.78520000 | 2.38840000  |
| H | 3.22650000  | -0.42890000 | 2.01760000  |
| C | -2.92240000 | -0.84910000 | -1.56370000 |
| H | -4.00300000 | -0.88550000 | -1.74440000 |
| H | -2.45030000 | -1.28950000 | -2.45510000 |
| P | 2.10040000  | -1.82080000 | 0.35080000  |
| P | -2.45700000 | -1.99620000 | -0.21450000 |
| C | 3.35530000  | -1.42570000 | -0.99560000 |
| C | 2.84460000  | -3.22510000 | 1.25490000  |
| C | -3.29810000 | -3.53240000 | -0.74140000 |

|    |             |             |             |
|----|-------------|-------------|-------------|
| C  | -3.40680000 | -1.47190000 | 1.32220000  |
| Rh | -0.16530000 | -1.97180000 | -0.09420000 |
| C  | -2.65050000 | -0.34940000 | 2.03580000  |
| H  | -1.62670000 | -0.64710000 | 2.28100000  |
| H  | -2.59410000 | 0.56000000  | 1.43340000  |
| H  | -3.17030000 | -0.10200000 | 2.96830000  |
| C  | -4.81150000 | -0.99370000 | 0.95730000  |
| H  | -5.38210000 | -1.74580000 | 0.40280000  |
| H  | -5.37460000 | -0.77290000 | 1.87070000  |
| H  | -4.78300000 | -0.07610000 | 0.36270000  |
| C  | 2.74360000  | -0.41500000 | -1.96940000 |
| H  | 1.77620000  | -0.75280000 | -2.35370000 |
| H  | 2.58910000  | 0.56150000  | -1.50530000 |
| H  | 3.41650000  | -0.27640000 | -2.82300000 |
| C  | 4.64270000  | -0.85310000 | -0.40500000 |
| H  | 5.09630000  | -1.51660000 | 0.33830000  |
| H  | 5.38210000  | -0.71030000 | -1.20100000 |
| H  | 4.47370000  | 0.12210000  | 0.06000000  |
| H  | 3.90940000  | -3.07550000 | 1.45300000  |
| H  | -4.38500000 | -3.41530000 | -0.76220000 |
| C  | -3.48390000 | -2.68690000 | 2.25020000  |
| H  | -3.91310000 | -2.38640000 | 3.21160000  |
| H  | -4.11640000 | -3.48180000 | 1.84570000  |
| H  | -2.49210000 | -3.10590000 | 2.44920000  |
| C  | 3.65580000  | -2.72840000 | -1.74180000 |
| H  | 4.30550000  | -2.51920000 | -2.59820000 |
| H  | 4.17270000  | -3.45820000 | -1.11250000 |
| H  | 2.74670000  | -3.19790000 | -2.12930000 |
| H  | -2.96070000 | -3.79730000 | -1.74570000 |
| H  | -3.04190000 | -4.35650000 | -0.07430000 |
| H  | 2.32200000  | -3.33160000 | 2.20760000  |
| H  | 2.71360000  | -4.15450000 | 0.69860000  |
| H  | -0.25300000 | -3.11040000 | 0.94750000  |
| C  | 0.04440000  | -3.79940000 | -1.09660000 |
| H  | 1.00710000  | -4.27250000 | -0.87310000 |
| H  | -0.72270000 | -4.53080000 | -0.82370000 |
| C  | -0.05350000 | -3.44680000 | -2.56710000 |
| H  | 0.63830000  | -2.64580000 | -2.85220000 |
| H  | -1.05670000 | -3.10740000 | -2.84650000 |
| H  | 0.17900000  | -4.30770000 | -3.21160000 |

Sum of electronic and thermal Energies= -1862.559610  
Sum of electronic and thermal Enthalpies= -1862.558666  
Sum of electronic and thermal Free Energies= -1862.654796

-----  
**TS-2'-H(Et)-2'**  
 -----

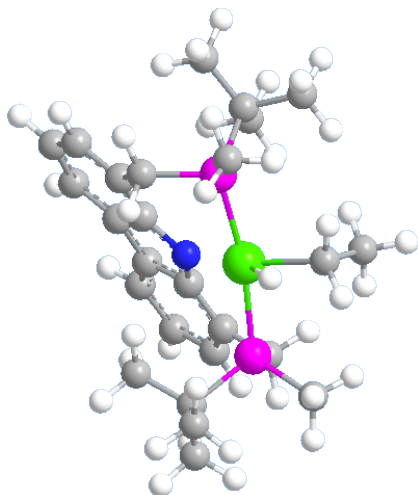

|   |             |             |             |
|---|-------------|-------------|-------------|
| C | -2.95120000 | 3.02010000  | -2.12460000 |
| C | -3.27780000 | 1.66030000  | -2.15880000 |
| C | -2.46260000 | 0.66740000  | -1.61930000 |
| C | -1.25770000 | 1.07010000  | -0.99810000 |
| C | -0.94410000 | 2.45990000  | -0.94980000 |
| C | -1.77690000 | 3.42450000  | -1.51680000 |
| H | -3.62600000 | 3.74680000  | -2.56390000 |
| H | -4.21060000 | 1.35210000  | -2.62610000 |
| H | -1.50990000 | 4.47620000  | -1.46440000 |
| C | 0.62320000  | 1.23850000  | 0.15930000  |
| C | 1.78050000  | 1.02860000  | 0.94110000  |
| C | 2.55310000  | 2.14010000  | 1.26710000  |
| C | 2.21800000  | 3.44120000  | 0.87280000  |
| C | 1.06900000  | 3.65890000  | 0.13450000  |
| C | 0.27520000  | 2.56580000  | -0.21610000 |
| H | 3.44980000  | 1.98100000  | 1.86240000  |
| H | 2.85770000  | 4.27010000  | 1.15610000  |
| H | 0.78610000  | 4.66210000  | -0.17150000 |
| N | -0.28960000 | 0.32100000  | -0.33780000 |
| C | 2.20690000  | -0.31970000 | 1.43670000  |
| H | 1.53890000  | -0.67480000 | 2.23440000  |
| H | 3.21470000  | -0.26630000 | 1.86430000  |
| C | -2.92500000 | -0.75760000 | -1.74130000 |
| H | -4.00770000 | -0.78820000 | -1.91070000 |
| H | -2.46250000 | -1.24110000 | -2.61510000 |
| P | 2.10760000  | -1.62880000 | 0.15890000  |
| P | -2.44410000 | -1.83040000 | -0.33920000 |
| C | 3.36920000  | -1.18040000 | -1.16650000 |
| C | 2.88910000  | -3.03180000 | 1.04240000  |
| C | -3.29950000 | -3.39190000 | -0.77600000 |
| C | -3.39190000 | -1.23480000 | 1.17690000  |

|    |            |            |            |
|----|------------|------------|------------|
| Rh | -0.1540000 | -1.8039000 | -0.2924000 |
| C  | -2.6391000 | -0.0827000 | 1.8451000  |
| H  | -1.6098000 | -0.3630000 | 2.0872000  |
| H  | -2.5995000 | 0.8077000  | 1.2140000  |
| H  | -3.1522000 | 0.1887000  | 2.7747000  |
| C  | -4.7981000 | -0.7758000 | 0.7946000  |
| H  | -5.3700000 | -1.5527000 | 0.2768000  |
| H  | -5.3591000 | -0.5131000 | 1.6982000  |
| H  | -4.7715000 | 0.1134000  | 0.1581000  |
| C  | 2.7217000  | -0.1985000 | -2.1466000 |
| H  | 1.7820000  | -0.5910000 | -2.5489000 |
| H  | 2.5011000  | 0.7641000  | -1.6794000 |
| H  | 3.4017000  | -0.0146000 | -2.9861000 |
| C  | 4.6274000  | -0.5587000 | -0.5644000 |
| H  | 5.0976000  | -1.2054000 | 0.1837000  |
| H  | 5.3700000  | -0.3862000 | -1.3516000 |
| H  | 4.4155000  | 0.4083000  | -0.0996000 |
| H  | 3.9356000  | -2.8285000 | 1.2873000  |
| H  | -4.3868000 | -3.2749000 | -0.7723000 |
| C  | -3.4637000 | -2.4089000 | 2.1571000  |
| H  | -3.8908000 | -2.0682000 | 3.1059000  |
| H  | -4.0944000 | -3.2233000 | 1.7904000  |
| H  | -2.4690000 | -2.8143000 | 2.3715000  |
| C  | 3.7267000  | -2.4701000 | -1.9102000 |
| H  | 4.3477000  | -2.2349000 | -2.7811000 |
| H  | 4.2928000  | -3.1666000 | -1.2855000 |
| H  | 2.8363000  | -2.9913000 | -2.2778000 |
| H  | -2.9949000 | -3.7021000 | -1.7778000 |
| H  | -3.0311000 | -4.1888000 | -0.0808000 |
| H  | 2.3406000  | -3.1979000 | 1.9719000  |
| H  | 2.8412000  | -3.9505000 | 0.4563000  |
| H  | -0.1771000 | -3.3120000 | 0.2373000  |
| C  | 0.0537000  | -3.8784000 | -1.0239000 |
| H  | 1.0357000  | -4.3155000 | -0.8197000 |
| H  | -0.6748000 | -4.6621000 | -0.7782000 |
| C  | -0.0715000 | -3.5628000 | -2.5118000 |
| H  | 0.6397000  | -2.8009000 | -2.8395000 |
| H  | -1.0687000 | -3.2058000 | -2.7795000 |
| H  | 0.1169000  | -4.4694000 | -3.1059000 |

Sum of electronic and thermal Energies= -1862.550248  
Sum of electronic and thermal Enthalpies= -1862.549304  
Sum of electronic and thermal Free Energies= -1862.645201

\*\*\*\*\* 1 imaginary frequencies (negative Signs) \*\*\*\*\*  
Diagonal vibrational polarizability:

32.9853176      46.0106998      23.7924185  
 Harmonic frequencies (cm<sup>-1</sup>), IR intensities (KM/Mole), Raman scattering  
 activities (A<sup>4</sup>/AMU), depolarization ratios for plane and unpolarized  
 incident light, reduced masses (AMU), force constants (mDyne/A),  
 and normal coordinates:

|                | 1         | 2       | 3       |
|----------------|-----------|---------|---------|
|                | A         | A       | A       |
| Frequencies -- | -586.8528 | 30.2108 | 40.2955 |
| Red. masses -- | 1.2988    | 4.0119  | 4.1750  |
| Frc consts --  | 0.2635    | 0.0022  | 0.0040  |
| IR Inten --    | 214.2577  | 0.2043  | 0.1861  |

---

**2'-H<sub>2</sub>(OCTENE) (n-octane analog)**


---

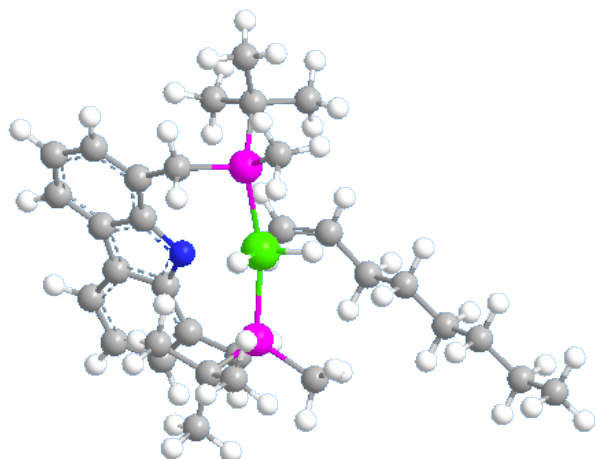

|    |             |             |             |
|----|-------------|-------------|-------------|
| C  | -3.97560000 | -4.40790000 | -2.84060000 |
| C  | -2.63890000 | -4.14940000 | -2.51800000 |
| C  | -2.22770000 | -3.00360000 | -1.83850000 |
| C  | -3.22490000 | -2.06940000 | -1.46730000 |
| C  | -4.59350000 | -2.36710000 | -1.75390000 |
| C  | -4.96120000 | -3.51820000 | -2.44910000 |
| H  | -4.23270000 | -5.31760000 | -3.37260000 |
| H  | -1.87940000 | -4.87750000 | -2.79530000 |
| H  | -6.00770000 | -3.72030000 | -2.66030000 |
| C  | -4.40150000 | -0.46220000 | -0.52120000 |
| C  | -4.86070000 | 0.63720000  | 0.23930000  |
| C  | -6.23550000 | 0.85190000  | 0.29460000  |
| C  | -7.16400000 | 0.02450000  | -0.34910000 |
| C  | -6.72430000 | -1.07300000 | -1.06840000 |
| C  | -5.35390000 | -1.32150000 | -1.14790000 |
| H  | -6.59660000 | 1.70090000  | 0.87190000  |
| H  | -8.22360000 | 0.24240000  | -0.26810000 |
| H  | -7.43200000 | -1.73660000 | -1.55780000 |
| N  | -3.11400000 | -0.89650000 | -0.75160000 |
| C  | -3.96410000 | 1.56730000  | 1.00710000  |
| H  | -3.54860000 | 1.06990000  | 1.89340000  |
| H  | -4.54840000 | 2.41820000  | 1.37640000  |
| C  | -0.75860000 | -2.87300000 | -1.52580000 |
| H  | -0.30810000 | -3.86850000 | -1.43700000 |
| H  | -0.21730000 | -2.38320000 | -2.34830000 |
| P  | -2.47420000 | 2.17540000  | 0.11440000  |
| P  | -0.33560000 | -1.87100000 | -0.05090000 |
| C  | -3.13620000 | 3.45540000  | -1.11250000 |
| C  | -1.68240000 | 3.20890000  | 1.40050000  |
| C  | 1.48080000  | -2.10000000 | 0.03560000  |
| C  | -0.91710000 | -2.85490000 | 1.45620000  |
| Rh | -1.24350000 | 0.22900000  | -0.31930000 |

|   |             |             |             |
|---|-------------|-------------|-------------|
| C | -2.41120000 | -2.67100000 | 1.72440000  |
| H | -2.67800000 | -1.62170000 | 1.86380000  |
| H | -3.03050000 | -3.06910000 | 0.91830000  |
| H | -2.66800000 | -3.21320000 | 2.64150000  |
| C | -0.64430000 | -4.34690000 | 1.25020000  |
| H | 0.40110000  | -4.56760000 | 1.01560000  |
| H | -0.88470000 | -4.88760000 | 2.17170000  |
| H | -1.27160000 | -4.76480000 | 0.45790000  |
| C | -4.20870000 | 2.82110000  | -2.00200000 |
| H | -3.90260000 | 1.85540000  | -2.41400000 |
| H | -5.14290000 | 2.65310000  | -1.46370000 |
| H | -4.42230000 | 3.48970000  | -2.84360000 |
| C | -3.74310000 | 4.65440000  | -0.38100000 |
| H | -2.99060000 | 5.24480000  | 0.14760000  |
| H | -4.22060000 | 5.31760000  | -1.11080000 |
| H | -4.51520000 | 4.36070000  | 0.33620000  |
| H | -2.38560000 | 3.90100000  | 1.86930000  |
| H | 1.74630000  | -3.12770000 | 0.29650000  |
| C | -0.13130000 | -2.33820000 | 2.66480000  |
| H | -0.51460000 | -2.80860000 | 3.57600000  |
| H | 0.93520000  | -2.57040000 | 2.60310000  |
| H | -0.24020000 | -1.25520000 | 2.78180000  |
| C | -1.97680000 | 3.93970000  | -1.98510000 |
| H | -2.30130000 | 4.79570000  | -2.58700000 |
| H | -1.11270000 | 4.26660000  | -1.39670000 |
| H | -1.64460000 | 3.16580000  | -2.67990000 |
| H | 1.92520000  | -1.87050000 | -0.93330000 |
| H | 1.91210000  | -1.42320000 | 0.77450000  |
| H | -1.27090000 | 2.54440000  | 2.16090000  |
| H | -0.85170000 | 3.77590000  | 0.97480000  |
| H | 0.04510000  | 0.96540000  | 0.21880000  |
| H | -1.47980000 | 0.09210000  | 1.22540000  |
| C | -1.24540000 | 0.34640000  | -2.68340000 |
| H | -2.15320000 | 0.92070000  | -2.81640000 |
| C | -0.06680000 | 0.93430000  | -2.32530000 |
| H | -0.05320000 | 2.00300000  | -2.12630000 |
| H | -1.27820000 | -0.66580000 | -3.07400000 |
| C | 1.28500000  | 0.33280000  | -2.55330000 |
| C | 2.37220000  | 0.79170000  | -1.59390000 |
| H | 1.58700000  | 0.60910000  | -3.57600000 |
| H | 1.21230000  | -0.76230000 | -2.57050000 |
| C | 3.74220000  | 0.21780000  | -1.91830000 |
| H | 2.42070000  | 1.88930000  | -1.60590000 |
| H | 2.08440000  | 0.52960000  | -0.56950000 |
| H | 3.67590000  | -0.87850000 | -1.98610000 |
| H | 4.05460000  | 0.54800000  | -2.91910000 |
| C | 4.80960000  | 0.59040000  | -0.90180000 |



|   |            |             |             |
|---|------------|-------------|-------------|
| C | 6.18780000 | 0.03510000  | -1.22960000 |
| H | 4.50120000 | 0.23810000  | 0.09330000  |
| H | 4.86770000 | 1.68470000  | -0.81690000 |
| C | 7.24170000 | 0.41010000  | -0.20300000 |
| H | 6.12540000 | -1.05750000 | -1.31650000 |
| H | 6.49290000 | 0.39050000  | -2.22240000 |
| H | 8.22360000 | 0.00360000  | -0.45620000 |
| H | 7.34770000 | 1.49620000  | -0.12130000 |
| H | 6.97850000 | 0.03640000  | 0.79130000  |

Sum of electronic and thermal Energies= -2098.276145

Sum of electronic and thermal Enthalpies= -2098.275201

Sum of electronic and thermal Free Energies= -2098.390049

-----  
**TS-2'-H<sub>2</sub>(OCTENE)- 2'-H( $\eta^2$ -octyl)**  
 -----

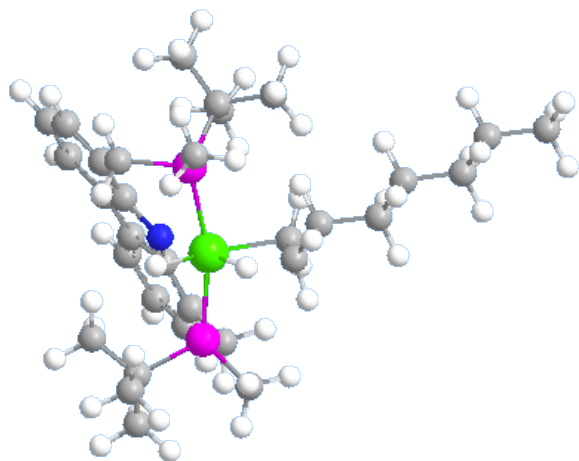

|    |            |             |             |
|----|------------|-------------|-------------|
| C  | 7.01570000 | -0.89210000 | 3.03830000  |
| C  | 6.11610000 | -1.84670000 | 2.55220000  |
| C  | 5.17160000 | -1.57040000 | 1.56560000  |
| C  | 5.12980000 | -0.25640000 | 1.04290000  |
| C  | 6.09440000 | 0.69210000  | 1.49980000  |
| C  | 7.01420000 | 0.38240000  | 2.50090000  |
| H  | 7.72580000 | -1.16630000 | 3.81100000  |
| H  | 6.15660000 | -2.85970000 | 2.94690000  |
| H  | 7.73100000 | 1.12780000  | 2.83390000  |
| C  | 4.85530000 | 1.54870000  | -0.20810000 |
| C  | 4.47150000 | 2.51620000  | -1.16480000 |
| C  | 5.13130000 | 3.74230000  | -1.14710000 |
| C  | 6.15620000 | 4.04480000  | -0.24220000 |
| C  | 6.55140000 | 3.09710000  | 0.68420000  |
| C  | 5.91080000 | 1.85750000  | 0.69870000  |
| H  | 4.83300000 | 4.49070000  | -1.87850000 |
| H  | 6.63580000 | 5.01700000  | -0.27790000 |
| H  | 7.34820000 | 3.30890000  | 1.39170000  |
| N  | 4.35490000 | 0.28290000  | 0.03180000  |
| C  | 3.38100000 | 2.30490000  | -2.17140000 |
| H  | 3.68560000 | 1.60680000  | -2.95880000 |
| H  | 3.13100000 | 3.25460000  | -2.65680000 |
| C  | 4.30470000 | -2.70580000 | 1.09720000  |
| H  | 4.81460000 | -3.66090000 | 1.26830000  |
| H  | 3.37050000 | -2.75880000 | 1.67190000  |
| P  | 1.87430000 | 1.54360000  | -1.44900000 |
| P  | 3.75510000 | -2.58460000 | -0.64270000 |
| Rh | 2.59240000 | -0.61740000 | -0.84940000 |
| C  | 1.28520000 | -0.94150000 | 0.89030000  |
| H  | 0.85880000 | -0.03530000 | 1.31300000  |
| C  | 0.61680000 | -1.52210000 | -0.24480000 |
| H  | 0.63510000 | -2.61450000 | -0.27750000 |

|   |             |             |             |
|---|-------------|-------------|-------------|
| H | 1.70660000  | -1.60580000 | 1.63900000  |
| H | 3.28150000  | -0.53240000 | -2.31880000 |
| H | 1.27730000  | -1.37260000 | -1.48670000 |
| C | 0.72570000  | 1.65020000  | -2.87190000 |
| H | -0.23110000 | 1.17210000  | -2.65970000 |
| H | 0.54600000  | 2.68490000  | -3.17640000 |
| H | 1.18760000  | 1.11510000  | -3.70430000 |
| C | 2.80100000  | -4.13870000 | -0.81900000 |
| H | 2.23150000  | -4.13930000 | -1.74970000 |
| H | 3.45110000  | -5.01700000 | -0.80150000 |
| H | 2.10040000  | -4.22470000 | 0.01440000  |
| C | 1.23610000  | 2.84070000  | -0.22270000 |
| C | 2.04900000  | 2.76700000  | 1.07560000  |
| H | 2.16010000  | 1.74090000  | 1.43670000  |
| H | 3.05070000  | 3.18260000  | 0.95510000  |
| H | 1.54040000  | 3.34900000  | 1.85250000  |
| C | -0.23380000 | 2.55580000  | 0.09740000  |
| H | -0.62030000 | 3.35050000  | 0.74480000  |
| H | -0.86800000 | 2.53000000  | -0.79480000 |
| H | -0.36290000 | 1.61470000  | 0.63760000  |
| C | 1.35420000  | 4.24830000  | -0.81040000 |
| H | 0.92270000  | 4.97010000  | -0.10800000 |
| H | 2.39670000  | 4.53610000  | -0.96610000 |
| H | 0.81550000  | 4.36110000  | -1.75640000 |
| C | 5.26130000  | -2.87180000 | -1.73400000 |
| C | 6.09290000  | -1.59530000 | -1.86630000 |
| H | 5.49590000  | -0.76270000 | -2.24470000 |
| H | 6.53510000  | -1.28990000 | -0.91530000 |
| H | 6.91160000  | -1.78130000 | -2.57030000 |
| C | 4.74630000  | -3.27810000 | -3.11680000 |
| H | 4.05360000  | -2.53120000 | -3.51710000 |
| H | 5.58920000  | -3.35500000 | -3.81100000 |
| H | 4.24260000  | -4.24900000 | -3.10780000 |
| C | 6.13890000  | -3.97910000 | -1.14710000 |
| H | 5.59720000  | -4.91580000 | -0.98290000 |
| H | 6.95520000  | -4.20040000 | -1.84280000 |
| H | 6.59470000  | -3.67340000 | -0.20130000 |
| C | -0.72550000 | -0.97560000 | -0.69700000 |
| C | -1.84430000 | -1.29820000 | 0.28440000  |
| H | -0.98090000 | -1.36210000 | -1.69260000 |
| H | -0.64780000 | 0.10930000  | -0.80760000 |
| C | -3.18330000 | -0.71610000 | -0.14240000 |
| H | -1.93310000 | -2.38710000 | 0.40200000  |
| H | -1.57210000 | -0.91590000 | 1.27710000  |
| H | -3.08310000 | 0.37330000  | -0.25620000 |
| H | -3.44490000 | -1.09120000 | -1.14190000 |
| C | -4.31700000 | -1.02090000 | 0.82390000  |

|   |             |             |             |
|---|-------------|-------------|-------------|
| C | -5.65460000 | -0.43430000 | 0.39660000  |
| H | -4.05630000 | -0.64530000 | 1.82330000  |
| H | -4.41650000 | -2.10940000 | 0.93860000  |
| C | -6.78000000 | -0.74610000 | 1.36700000  |
| H | -5.55200000 | 0.65270000  | 0.28320000  |
| H | -5.91050000 | -0.81000000 | -0.60270000 |
| H | -7.73100000 | -0.31740000 | 1.04290000  |
| H | -6.92580000 | -1.82550000 | 1.47240000  |
| H | -6.56510000 | -0.35100000 | 2.36450000  |

Sum of electronic and thermal Energies= -2098.259279  
 Sum of electronic and thermal Enthalpies= -2098.258334  
 Sum of electronic and thermal Free Energies= -2098.371120

\*\*\*\*\* 1 imaginary frequencies (negative Signs) \*\*\*\*\*

Diagonal vibrational polarizability:

50.6735704 30.0818854 34.8044040

Harmonic frequencies (cm<sup>-1</sup>), IR intensities (KM/Mole), Raman scattering activities (A<sup>4</sup>/AMU), depolarization ratios for plane and unpolarized incident light, reduced masses (AMU), force constants (mDyne/A), and normal coordinates:

|                | 1         | 2       | 3       |
|----------------|-----------|---------|---------|
|                | A         | A       | A       |
| Frequencies -- | -557.5557 | 14.6034 | 21.3833 |
| Red. masses -- | 1.3656    | 4.2615  | 4.4288  |
| Frc consts --  | 0.2501    | 0.0005  | 0.0012  |
| IR Inten --    | 1.4773    | 0.1660  | 0.0754  |

---

**2'-H( $\eta^2$ -octyl) (n-octane analog)**


---

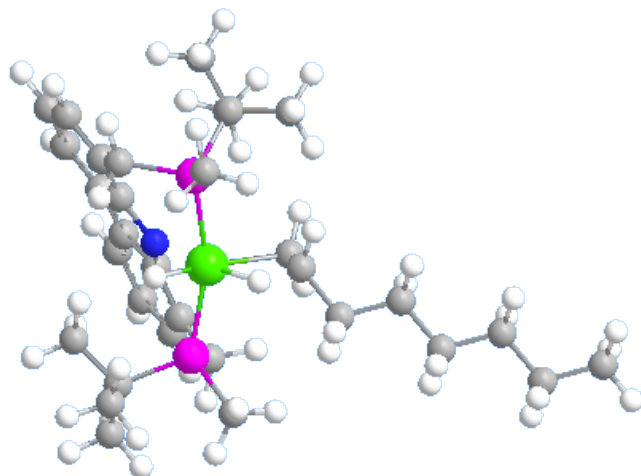

|   |            |             |             |
|---|------------|-------------|-------------|
| C | 4.71570000 | -3.34600000 | 3.27570000  |
| C | 3.54410000 | -3.53530000 | 2.53550000  |
| C | 3.12350000 | -2.66040000 | 1.53590000  |
| C | 3.92940000 | -1.52750000 | 1.27480000  |
| C | 5.15540000 | -1.37710000 | 1.98960000  |
| C | 5.53470000 | -2.26790000 | 2.99310000  |
| H | 4.98830000 | -4.06150000 | 4.04400000  |
| H | 2.93180000 | -4.41270000 | 2.73180000  |
| H | 6.47060000 | -2.12430000 | 3.52560000  |
| C | 4.96140000 | 0.21850000  | 0.37260000  |
| C | 5.38000000 | 1.31880000  | -0.41110000 |
| C | 6.59990000 | 1.91150000  | -0.09640000 |
| C | 7.42490000 | 1.45580000  | 0.93910000  |
| C | 7.03280000 | 0.36720000  | 1.69650000  |
| C | 5.81420000 | -0.25050000 | 1.41390000  |
| H | 6.91980000 | 2.76350000  | -0.69270000 |
| H | 8.36700000 | 1.95590000  | 1.13580000  |
| H | 7.66080000 | -0.00640000 | 2.50040000  |
| N | 3.80280000 | -0.53450000 | 0.31870000  |
| C | 4.56670000 | 1.89980000  | -1.52960000 |
| H | 4.54700000 | 1.24070000  | -2.40480000 |
| H | 4.99320000 | 2.85740000  | -1.84760000 |
| C | 1.87420000 | -3.02030000 | 0.77990000  |
| H | 1.73000000 | -4.10690000 | 0.79260000  |
| H | 0.98320000 | -2.59010000 | 1.25740000  |
| P | 2.80680000 | 2.09220000  | -1.06240000 |
| P | 1.80910000 | -2.37560000 | -0.92970000 |
| C | 2.79310000 | 3.40600000  | 0.29330000  |
| C | 2.09640000 | 2.94120000  | -2.51950000 |
| C | 0.23350000 | -3.10390000 | -1.52440000 |
| C | 3.09020000 | -3.32310000 | -1.94330000 |

|    |             |             |             |
|----|-------------|-------------|-------------|
| C  | -0.15720000 | 0.57990000  | -0.39570000 |
| C  | 0.59730000  | 0.25770000  | 0.82100000  |
| H  | 0.24570000  | -0.61690000 | 1.37010000  |
| H  | -0.28310000 | 1.65670000  | -0.56010000 |
| H  | 0.83930000  | 1.07990000  | 1.48890000  |
| Rh | 2.03300000  | -0.08600000 | -0.77220000 |
| H  | 0.45350000  | 0.30240000  | -1.43620000 |
| H  | 2.76720000  | -0.23970000 | -2.23200000 |
| C  | 3.70720000  | 4.57980000  | -0.05900000 |
| H  | 3.44420000  | 5.05380000  | -1.00970000 |
| H  | 3.62690000  | 5.34970000  | 0.71670000  |
| H  | 4.75660000  | 4.27560000  | -0.10140000 |
| C  | 3.25610000  | 2.78940000  | 1.61900000  |
| H  | 2.77890000  | 1.82670000  | 1.81950000  |
| H  | 4.33530000  | 2.62870000  | 1.63810000  |
| H  | 3.00820000  | 3.47090000  | 2.44070000  |
| C  | 2.67920000  | -3.20260000 | -3.41340000 |
| H  | 2.58290000  | -2.15390000 | -3.71140000 |
| H  | 3.44990000  | -3.65740000 | -4.04400000 |
| H  | 1.73730000  | -3.71300000 | -3.63220000 |
| C  | 4.49120000  | -2.73430000 | -1.77900000 |
| H  | 4.51360000  | -1.67390000 | -2.03890000 |
| H  | 4.87220000  | -2.84410000 | -0.76150000 |
| H  | 5.17450000  | -3.26790000 | -2.44920000 |
| H  | -0.52270000 | -3.01700000 | -0.74350000 |
| H  | 2.50580000  | 3.94520000  | -2.65960000 |
| C  | 3.11790000  | -4.79210000 | -1.51640000 |
| H  | 2.13800000  | -5.27630000 | -1.57080000 |
| H  | 3.78620000  | -5.34970000 | -2.18110000 |
| H  | 3.50270000  | -4.90810000 | -0.49930000 |
| C  | 1.35340000  | 3.90520000  | 0.44330000  |
| H  | 0.97040000  | 4.36470000  | -0.47280000 |
| H  | 0.67070000  | 3.10330000  | 0.73700000  |
| H  | 1.31110000  | 4.66690000  | 1.22930000  |
| H  | -0.12640000 | -2.58290000 | -2.41300000 |
| H  | 0.34970000  | -4.16440000 | -1.76110000 |
| H  | 1.01010000  | 3.01140000  | -2.44000000 |
| H  | 2.32710000  | 2.33810000  | -3.39950000 |
| C  | -1.48140000 | -0.14390000 | -0.61640000 |
| C  | -2.57990000 | 0.43860000  | 0.26280000  |
| H  | -1.35210000 | -1.20430000 | -0.37570000 |
| H  | -1.78640000 | -0.10220000 | -1.67040000 |
| C  | -3.91010000 | -0.28540000 | 0.12340000  |
| H  | -2.25020000 | 0.41160000  | 1.30980000  |
| H  | -2.71400000 | 1.50270000  | 0.02320000  |
| H  | -4.23420000 | -0.26150000 | -0.92650000 |
| H  | -3.77220000 | -1.34930000 | 0.36260000  |

|   |             |             |             |
|---|-------------|-------------|-------------|
| C | -5.00720000 | 0.29090000  | 1.00500000  |
| C | -6.33610000 | -0.44010000 | 0.88170000  |
| H | -5.15140000 | 1.35300000  | 0.76180000  |
| H | -4.67850000 | 0.27450000  | 2.05360000  |
| C | -7.42180000 | 0.14410000  | 1.76810000  |
| H | -6.66230000 | -0.42270000 | -0.16640000 |
| H | -6.18850000 | -1.50030000 | 1.12490000  |
| H | -8.36700000 | -0.39420000 | 1.66710000  |
| H | -7.13480000 | 0.10770000  | 2.82340000  |
| H | -7.61370000 | 1.19290000  | 1.52220000  |

Sum of electronic and thermal Energies= -2098.255382

Sum of electronic and thermal Enthalpies= -2098.254438

Sum of electronic and thermal Free Energies= -2098.369139

---

**TS-2'-H( $\eta^2$ -octyl)- 2'-H(octyl) (n-octane analog)**


---

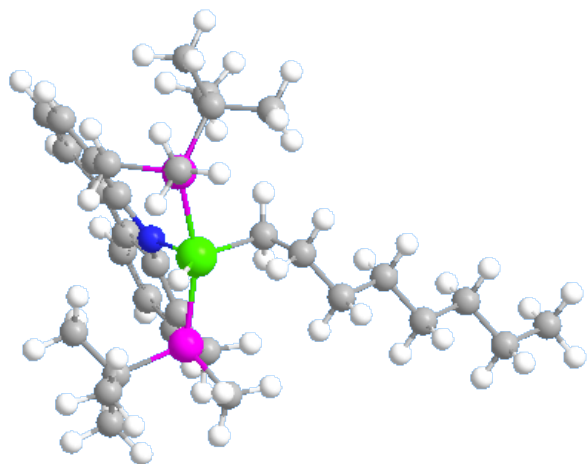

|   |             |             |             |
|---|-------------|-------------|-------------|
| C | -2.13530000 | 3.38710000  | 3.22080000  |
| C | -1.43450000 | 3.29630000  | 2.01370000  |
| C | -1.77110000 | 2.39690000  | 1.00340000  |
| C | -2.87100000 | 1.53880000  | 1.23860000  |
| C | -3.62330000 | 1.68220000  | 2.44290000  |
| C | -3.24570000 | 2.58830000  | 3.43250000  |
| H | -1.82370000 | 4.10770000  | 3.96930000  |
| H | -0.59720000 | 3.96800000  | 1.83790000  |
| H | -3.83020000 | 2.67840000  | 4.34370000  |
| C | -4.63470000 | 0.20020000  | 1.03240000  |
| C | -5.67300000 | -0.63430000 | 0.56410000  |
| C | -6.74740000 | -0.86180000 | 1.41970000  |
| C | -6.84110000 | -0.28860000 | 2.69400000  |
| C | -5.84590000 | 0.56250000  | 3.14040000  |
| C | -4.75280000 | 0.81670000  | 2.31140000  |
| H | -7.54800000 | -1.51070000 | 1.07100000  |
| H | -7.70340000 | -0.50220000 | 3.31640000  |
| H | -5.91590000 | 1.03740000  | 4.11480000  |
| N | -3.46840000 | 0.60760000  | 0.41010000  |
| C | -5.68110000 | -1.28020000 | -0.79120000 |
| H | -5.82360000 | -0.53500000 | -1.58500000 |
| H | -6.51790000 | -1.98450000 | -0.86710000 |
| C | -0.97450000 | 2.44810000  | -0.27460000 |
| H | -0.57940000 | 3.45880000  | -0.42650000 |
| H | -0.09230000 | 1.79360000  | -0.21690000 |
| P | -4.09460000 | -2.09630000 | -1.22820000 |
| P | -1.86470000 | 1.86460000  | -1.76620000 |
| C | -3.95530000 | -3.58710000 | -0.07280000 |
| C | -4.51220000 | -2.85950000 | -2.84050000 |
| C | -0.58530000 | 2.04770000  | -3.06190000 |
| C | -3.12550000 | 3.19090000  | -2.22150000 |
| C | -0.32230000 | -1.44770000 | -1.15590000 |



|    |             |             |             |
|----|-------------|-------------|-------------|
| C  | -1.12710000 | -0.93480000 | -0.01080000 |
| H  | -0.67930000 | -0.10940000 | 0.54710000  |
| H  | -0.28710000 | -2.54440000 | -1.17870000 |
| H  | -1.51320000 | -1.68170000 | 0.67980000  |
| Rh | -2.64350000 | -0.23860000 | -1.31520000 |
| H  | -0.89970000 | -1.19860000 | -2.10730000 |
| H  | -3.12490000 | -0.17440000 | -2.92960000 |
| C  | -5.14810000 | -4.53310000 | -0.21530000 |
| H  | -5.20110000 | -5.00020000 | -1.20180000 |
| H  | -5.05910000 | -5.34210000 | 0.51860000  |
| H  | -6.09940000 | -4.02940000 | -0.01950000 |
| C  | -3.86400000 | -3.12960000 | 1.38710000  |
| H  | -3.16200000 | -2.30540000 | 1.53160000  |
| H  | -4.82870000 | -2.79910000 | 1.77490000  |
| H  | -3.52630000 | -3.96900000 | 2.00580000  |
| C  | -3.43130000 | 3.04440000  | -3.71410000 |
| H  | -3.72380000 | 2.01930000  | -3.96340000 |
| H  | -4.26390000 | 3.70370000  | -3.97970000 |
| H  | -2.58210000 | 3.32320000  | -4.34370000 |
| C  | -4.41870000 | 2.98670000  | -1.43160000 |
| H  | -4.82970000 | 1.98650000  | -1.59260000 |
| H  | -4.27620000 | 3.12130000  | -0.35700000 |
| H  | -5.15990000 | 3.72180000  | -1.76480000 |
| H  | 0.30540000  | 1.48790000  | -2.77320000 |
| H  | -5.37610000 | -3.52590000 | -2.78020000 |
| C  | -2.56650000 | 4.58410000  | -1.93330000 |
| H  | -1.60820000 | 4.76660000  | -2.43050000 |
| H  | -3.26710000 | 5.34210000  | -2.30010000 |
| H  | -2.43650000 | 4.75480000  | -0.86100000 |
| C  | -2.67060000 | -4.32950000 | -0.44880000 |
| H  | -2.65460000 | -4.63790000 | -1.49880000 |
| H  | -1.78390000 | -3.71900000 | -0.26190000 |
| H  | -2.57610000 | -5.23720000 | 0.15740000  |
| H  | -0.95130000 | 1.63430000  | -4.00220000 |
| H  | -0.30220000 | 3.09340000  | -3.21480000 |
| H  | -3.65960000 | -3.41290000 | -3.23860000 |
| H  | -4.73000000 | -2.05020000 | -3.53850000 |
| C  | 1.08330000  | -0.87120000 | -1.28580000 |
| C  | 2.02740000  | -1.36790000 | -0.20010000 |
| H  | 1.02860000  | 0.22470000  | -1.23230000 |
| H  | 1.50030000  | -1.10500000 | -2.27390000 |
| C  | 3.42230000  | -0.77000000 | -0.29600000 |
| H  | 1.59560000  | -1.14270000 | 0.78470000  |
| H  | 2.09220000  | -2.46400000 | -0.24830000 |
| H  | 3.84770000  | -0.99000000 | -1.28550000 |
| H  | 3.35190000  | 0.32590000  | -0.24580000 |
| C  | 4.37330000  | -1.26320000 | 0.78330000  |

|   |            |             |             |
|---|------------|-------------|-------------|
| C | 5.76750000 | -0.66090000 | 0.68760000  |
| H | 4.44560000 | -2.35890000 | 0.73390000  |
| H | 3.94830000 | -1.04360000 | 1.77260000  |
| C | 6.70860000 | -1.15950000 | 1.76990000  |
| H | 6.18890000 | -0.88140000 | -0.30190000 |
| H | 5.69180000 | 0.43310000  | 0.73630000  |
| H | 7.70340000 | -0.71620000 | 1.68420000  |
| H | 6.32800000 | -0.92070000 | 2.76770000  |
| H | 6.82850000 | -2.24610000 | 1.72230000  |

Sum of electronic and thermal Energies= -2098.246818  
Sum of electronic and thermal Enthalpies= -2098.245873  
Sum of electronic and thermal Free Energies= -2098.361145

\*\*\*\*\* 1 imaginary frequencies (negative Signs) \*\*\*\*\*

Diagonal vibrational polarizability:

36.0654781 34.7420488 40.2670368

Harmonic frequencies (cm<sup>-1</sup>), IR intensities (KM/Mole), Raman scattering activities (A<sup>4</sup>/AMU), depolarization ratios for plane and unpolarized incident light, reduced masses (AMU), force constants (mDyne/A), and normal coordinates:

|                | 1         | 2       | 3       |
|----------------|-----------|---------|---------|
|                | A         | A       | A       |
| Frequencies -- | -294.5537 | 14.7694 | 20.3334 |
| Red. masses -- | 1.5033    | 4.2825  | 4.4228  |
| Frc consts --  | 0.0768    | 0.0006  | 0.0011  |
| IR Inten --    | 23.2795   | 0.0674  | 0.1082  |

---

**2'-H(octyl) (n-octane analog)**


---

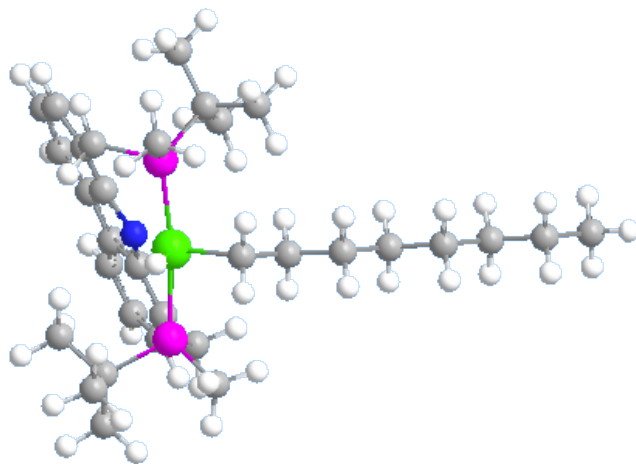

|    |            |             |             |
|----|------------|-------------|-------------|
| C  | 5.62340000 | -2.45570000 | 3.37780000  |
| C  | 4.71370000 | -2.96810000 | 2.44660000  |
| C  | 4.27670000 | -2.24800000 | 1.33630000  |
| C  | 4.80720000 | -0.95240000 | 1.14540000  |
| C  | 5.73380000 | -0.43930000 | 2.09710000  |
| C  | 6.13280000 | -1.18080000 | 3.20910000  |
| H  | 5.92480000 | -3.06350000 | 4.22420000  |
| H  | 4.31810000 | -3.97110000 | 2.59070000  |
| H  | 6.84180000 | -0.76590000 | 3.91970000  |
| C  | 5.41390000 | 1.03980000  | 0.39740000  |
| C  | 5.64190000 | 2.21450000  | -0.35320000 |
| C  | 6.49040000 | 3.17510000  | 0.19200000  |
| C  | 7.13910000 | 3.00560000  | 1.42090000  |
| C  | 6.96190000 | 1.83480000  | 2.13630000  |
| C  | 6.10930000 | 0.85600000  | 1.62390000  |
| H  | 6.66310000 | 4.08640000  | -0.37650000 |
| H  | 7.78960000 | 3.78810000  | 1.79660000  |
| H  | 7.47570000 | 1.67650000  | 3.08020000  |
| N  | 4.59370000 | -0.04420000 | 0.11310000  |
| C  | 5.05330000 | 2.46180000  | -1.71130000 |
| H  | 5.52640000 | 1.81010000  | -2.46050000 |
| H  | 5.24490000 | 3.49430000  | -2.02470000 |
| C  | 3.24640000 | -2.88670000 | 0.44710000  |
| H  | 3.22910000 | -3.97050000 | 0.61050000  |
| H  | 2.24150000 | -2.52260000 | 0.71040000  |
| P  | 3.27090000 | 2.06170000  | -1.84360000 |
| P  | 3.39010000 | -2.50620000 | -1.33830000 |
| C  | 2.37080000 | 3.25020000  | -0.69380000 |
| C  | 2.87220000 | 2.67520000  | -3.51940000 |
| C  | 2.08070000 | -3.57270000 | -2.04140000 |
| C  | 4.98590000 | -3.28900000 | -1.95300000 |
| Rh | 3.18260000 | -0.22860000 | -1.53500000 |

|   |             |             |             |
|---|-------------|-------------|-------------|
| C | 6.15980000  | -2.34980000 | -1.66710000 |
| H | 6.00020000  | -1.36090000 | -2.10720000 |
| H | 6.32720000  | -2.21070000 | -0.59670000 |
| H | 7.07380000  | -2.77500000 | -2.09670000 |
| C | 5.22840000  | -4.63680000 | -1.27510000 |
| H | 4.39400000  | -5.33260000 | -1.41060000 |
| H | 6.11610000  | -5.11230000 | -1.70640000 |
| H | 5.40970000  | -4.52160000 | -0.20260000 |
| C | 2.43180000  | 2.70540000  | 0.73570000  |
| H | 2.06280000  | 1.67680000  | 0.79540000  |
| H | 3.44800000  | 2.71340000  | 1.13600000  |
| H | 1.80990000  | 3.32630000  | 1.39040000  |
| C | 2.99490000  | 4.64400000  | -0.73770000 |
| H | 3.02330000  | 5.06080000  | -1.74960000 |
| H | 2.40370000  | 5.33260000  | -0.12360000 |
| H | 4.01220000  | 4.64220000  | -0.33630000 |
| H | 2.96060000  | 3.76230000  | -3.59590000 |
| H | 2.28550000  | -4.63360000 | -1.87380000 |
| C | 4.85340000  | -3.47230000 | -3.46700000 |
| H | 5.81160000  | -3.80300000 | -3.88090000 |
| H | 4.10690000  | -4.22580000 | -3.73240000 |
| H | 4.58580000  | -2.53460000 | -3.96490000 |
| C | 0.91000000  | 3.31560000  | -1.14800000 |
| H | 0.33180000  | 3.91800000  | -0.43920000 |
| H | 0.80090000  | 3.77840000  | -2.13290000 |
| H | 0.44800000  | 2.32430000  | -1.18640000 |
| H | 1.12750000  | -3.32620000 | -1.56800000 |
| H | 1.97730000  | -3.39560000 | -3.11280000 |
| H | 3.56840000  | 2.21630000  | -4.22420000 |
| H | 1.86280000  | 2.37910000  | -3.80880000 |
| H | 3.19150000  | -0.39770000 | -3.07130000 |
| C | 1.20170000  | -0.34090000 | -2.20630000 |
| H | 0.91310000  | 0.55570000  | -2.76960000 |
| H | 1.02090000  | -1.18670000 | -2.87930000 |
| C | 0.34560000  | -0.47010000 | -0.95900000 |
| H | 0.60750000  | 0.31030000  | -0.22900000 |
| H | 0.55780000  | -1.41860000 | -0.44450000 |
| C | -1.15440000 | -0.39030000 | -1.24610000 |
| C | -2.01820000 | -0.45640000 | 0.00400000  |
| H | -1.43450000 | -1.19910000 | -1.93560000 |
| H | -1.36740000 | 0.54160000  | -1.78910000 |
| C | -3.50990000 | -0.37640000 | -0.28230000 |
| H | -1.80020000 | -1.38390000 | 0.55210000  |
| H | -1.73240000 | 0.35800000  | 0.68490000  |
| H | -3.72550000 | 0.55040000  | -0.83250000 |
| H | -3.79510000 | -1.19150000 | -0.96240000 |
| C | -4.37620000 | -0.43470000 | 0.96620000  |

|   |             |             |             |
|---|-------------|-------------|-------------|
| C | -5.86810000 | -0.35150000 | 0.67790000  |
| H | -4.09100000 | 0.37960000  | 1.64720000  |
| H | -4.16280000 | -1.36190000 | 1.51660000  |
| C | -6.72270000 | -0.40970000 | 1.93170000  |
| H | -6.07810000 | 0.57490000  | 0.12770000  |
| H | -6.15020000 | -1.16580000 | -0.00230000 |
| H | -7.78960000 | -0.34890000 | 1.70420000  |
| H | -6.55740000 | -1.34090000 | 2.48210000  |
| H | -6.48520000 | 0.41340000  | 2.61260000  |

|                                              |              |
|----------------------------------------------|--------------|
| Sum of electronic and thermal Energies=      | -2098.285783 |
| Sum of electronic and thermal Enthalpies=    | -2098.284839 |
| Sum of electronic and thermal Free Energies= | -2098.402795 |

---

**TS-2'-H( $\eta^2$ -octyl)-2' (n-octane analog)**


---

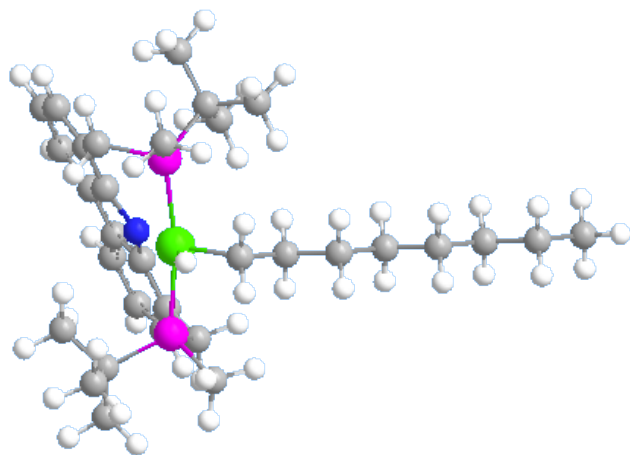

|    |            |             |             |
|----|------------|-------------|-------------|
| C  | 5.59710000 | -2.44360000 | 3.32120000  |
| C  | 4.63360000 | -2.95150000 | 2.44310000  |
| C  | 4.16750000 | -2.24800000 | 1.33450000  |
| C  | 4.71510000 | -0.96730000 | 1.08930000  |
| C  | 5.70900000 | -0.46600000 | 1.97990000  |
| C  | 6.13870000 | -1.19240000 | 3.09040000  |
| H  | 5.91900000 | -3.03850000 | 4.16920000  |
| H  | 4.22170000 | -3.94170000 | 2.62540000  |
| H  | 6.89790000 | -0.78330000 | 3.75100000  |
| C  | 5.35660000 | 0.98500000  | 0.26270000  |
| C  | 5.56810000 | 2.15090000  | -0.50630000 |
| C  | 6.48140000 | 3.08660000  | -0.02770000 |
| C  | 7.20370000 | 2.90670000  | 1.15810000  |
| C  | 7.02590000 | 1.75340000  | 1.90040000  |
| C  | 6.11100000 | 0.79830000  | 1.45450000  |
| H  | 6.64040000 | 3.98960000  | -0.61330000 |
| H  | 7.90330000 | 3.66970000  | 1.48230000  |
| H  | 7.58440000 | 1.59040000  | 2.81780000  |
| N  | 4.48710000 | -0.07370000 | 0.04860000  |
| C  | 4.87150000 | 2.42190000  | -1.80510000 |
| H  | 5.25880000 | 1.77020000  | -2.60140000 |
| H  | 5.05020000 | 3.45540000  | -2.12350000 |
| C  | 3.11540000 | -2.90180000 | 0.48340000  |
| H  | 3.11470000 | -3.98510000 | 0.65170000  |
| H  | 2.11290000 | -2.54460000 | 0.76390000  |
| P  | 3.07800000 | 2.05150000  | -1.76490000 |
| P  | 3.23680000 | -2.50740000 | -1.29930000 |
| C  | 2.30470000 | 3.26530000  | -0.54880000 |
| C  | 2.55940000 | 2.69180000  | -3.40240000 |
| C  | 1.92640000 | -3.58530000 | -1.99380000 |
| C  | 4.82400000 | -3.29130000 | -1.94430000 |
| Rh | 2.98050000 | -0.23750000 | -1.44770000 |

|   |             |             |             |
|---|-------------|-------------|-------------|
| C | 6.00880000  | -2.35910000 | -1.68320000 |
| H | 5.83670000  | -1.36370000 | -2.10330000 |
| H | 6.21290000  | -2.23680000 | -0.61730000 |
| H | 6.90640000  | -2.78120000 | -2.14930000 |
| C | 5.07600000  | -4.64250000 | -1.27730000 |
| H | 4.23820000  | -5.33660000 | -1.40040000 |
| H | 5.95510000  | -5.11790000 | -1.72610000 |
| H | 5.27650000  | -4.53180000 | -0.20770000 |
| C | 2.43030000  | 2.68810000  | 0.86350000  |
| H | 2.00690000  | 1.68020000  | 0.92600000  |
| H | 3.47050000  | 2.62700000  | 1.19170000  |
| H | 1.89300000  | 3.32860000  | 1.57210000  |
| C | 2.97830000  | 4.63430000  | -0.61160000 |
| H | 2.95920000  | 5.06490000  | -1.61820000 |
| H | 2.45580000  | 5.33660000  | 0.04780000  |
| H | 4.01840000  | 4.58590000  | -0.27730000 |
| H | 2.71850000  | 3.77070000  | -3.48730000 |
| H | 2.14930000  | -4.64520000 | -1.84290000 |
| C | 4.66080000  | -3.46700000 | -3.45660000 |
| H | 5.61080000  | -3.79400000 | -3.89180000 |
| H | 3.91000000  | -4.21950000 | -3.71250000 |
| H | 4.38350000  | -2.52540000 | -3.94260000 |
| C | 0.82180000  | 3.39450000  | -0.90840000 |
| H | 0.30580000  | 3.98160000  | -0.14120000 |
| H | 0.66850000  | 3.90230000  | -1.86470000 |
| H | 0.32530000  | 2.41920000  | -0.95920000 |
| H | 0.97790000  | -3.36290000 | -1.49950000 |
| H | 1.80000000  | -3.40310000 | -3.06210000 |
| H | 3.15440000  | 2.19130000  | -4.16920000 |
| H | 1.50840000  | 2.47820000  | -3.60150000 |
| H | 2.27420000  | -0.43730000 | -2.86810000 |
| C | 0.97340000  | -0.36340000 | -2.35980000 |
| H | 0.66570000  | 0.54590000  | -2.88810000 |
| H | 0.68220000  | -1.19490000 | -3.01680000 |
| C | 0.16550000  | -0.48500000 | -1.06490000 |
| H | 0.45670000  | 0.29760000  | -0.35400000 |
| H | 0.39000000  | -1.43170000 | -0.55870000 |
| C | -1.33780000 | -0.39800000 | -1.32550000 |
| C | -2.17250000 | -0.45640000 | -0.05540000 |
| H | -1.63940000 | -1.20740000 | -2.00560000 |
| H | -1.55840000 | 0.53490000  | -1.86390000 |
| C | -3.66990000 | -0.37120000 | -0.30820000 |
| H | -1.94550000 | -1.38300000 | 0.49010000  |
| H | -1.86750000 | 0.35900000  | 0.61580000  |
| H | -3.89460000 | 0.55590000  | -0.85410000 |
| H | -3.97310000 | -1.18590000 | -0.98080000 |
| C | -4.50770000 | -0.42550000 | 0.95980000  |

|   |             |             |            |
|---|-------------|-------------|------------|
| C | -6.00530000 | -0.33830000 | 0.70480000 |
| H | -4.20480000 | 0.38850000  | 1.63330000 |
| H | -4.28460000 | -1.35290000 | 1.50600000 |
| C | -6.83190000 | -0.39440000 | 1.97730000 |
| H | -6.22500000 | 0.58880000  | 0.15940000 |
| H | -6.30460000 | -1.15180000 | 0.03110000 |
| H | -7.90330000 | -0.33040000 | 1.77350000 |
| H | -6.65700000 | -1.32620000 | 2.52370000 |
| H | -6.57690000 | 0.42780000  | 2.65290000 |

Sum of electronic and thermal Energies= -2098.276592  
Sum of electronic and thermal Enthalpies= -2098.275648  
Sum of electronic and thermal Free Energies= -2098.392760

\*\*\*\*\* 1 imaginary frequencies (negative Signs) \*\*\*\*\*

Diagonal vibrational polarizability:

59.8125191 36.1994885 38.8294816

Harmonic frequencies (cm<sup>-1</sup>), IR intensities (KM/Mole), Raman scattering activities (A<sup>4</sup>/AMU), depolarization ratios for plane and unpolarized incident light, reduced masses (AMU), force constants (mDyne/A), and normal coordinates:

|                | 1         | 2       | 3       |
|----------------|-----------|---------|---------|
|                | A         | A       | A       |
| Frequencies -- | -568.8818 | 11.6646 | 16.2041 |
| Red. masses -- | 1.3131    | 4.3116  | 4.6819  |
| Frc consts --  | 0.2504    | 0.0003  | 0.0007  |
| IR Inten --    | 249.5308  | 0.0316  | 0.1947  |



---

**2'-H<sub>2</sub>(cyclooctane)**


---

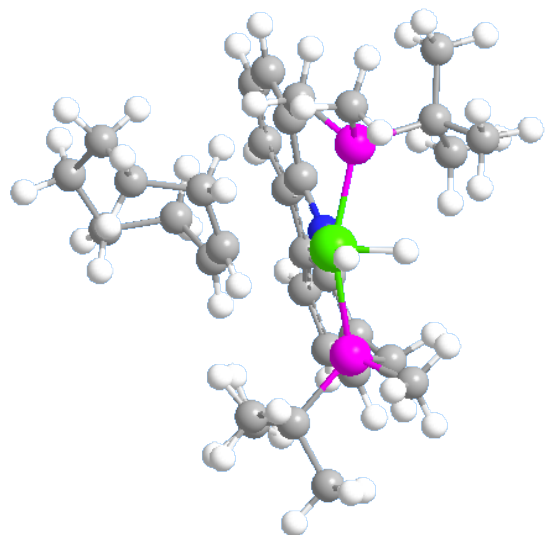

|   |             |             |             |
|---|-------------|-------------|-------------|
| C | 2.13380000  | -3.73830000 | 3.00470000  |
| C | 2.55540000  | -3.16090000 | 1.80050000  |
| C | 1.69390000  | -2.48800000 | 0.93770000  |
| C | 0.34150000  | -2.36380000 | 1.33260000  |
| C | -0.09430000 | -3.00770000 | 2.52980000  |
| C | 0.79880000  | -3.68040000 | 3.36430000  |
| H | 2.85300000  | -4.25170000 | 3.63410000  |
| H | 3.59900000  | -3.25760000 | 1.50670000  |
| H | 0.44710000  | -4.15830000 | 4.27460000  |
| C | -1.83800000 | -2.04380000 | 1.42100000  |
| C | -3.19760000 | -1.74050000 | 1.16760000  |
| C | -4.14540000 | -2.21620000 | 2.07220000  |
| C | -3.81160000 | -2.95540000 | 3.21260000  |
| C | -2.48560000 | -3.25810000 | 3.46920000  |
| C | -1.50860000 | -2.81860000 | 2.57710000  |
| H | -5.19250000 | -1.99480000 | 1.87580000  |
| H | -4.59580000 | -3.29710000 | 3.87970000  |
| H | -2.20760000 | -3.84230000 | 4.34230000  |
| N | -0.70760000 | -1.74230000 | 0.68880000  |
| C | -3.70410000 | -0.89970000 | 0.02400000  |
| H | -3.78980000 | 0.15160000  | 0.33560000  |
| H | -4.72330000 | -1.20270000 | -0.24340000 |
| C | 2.22860000  | -2.02990000 | -0.39040000 |
| H | 3.31420000  | -2.18260000 | -0.42390000 |
| H | 1.80650000  | -2.64210000 | -1.19950000 |
| P | -2.66000000 | -0.84080000 | -1.47820000 |
| P | 1.82320000  | -0.30970000 | -0.90040000 |
| C | -2.85680000 | -2.52790000 | -2.30470000 |
| C | -3.62610000 | 0.25630000  | -2.57980000 |

|    |             |             |             |
|----|-------------|-------------|-------------|
| C  | 2.48570000  | -0.27900000 | -2.60870000 |
| C  | 3.06530000  | 0.77220000  | 0.03500000  |
| Rh | -0.51700000 | -0.24290000 | -0.94520000 |
| C  | 3.04520000  | 0.41930000  | 1.52410000  |
| H  | 2.03840000  | 0.37810000  | 1.94800000  |
| H  | 3.50480000  | -0.55250000 | 1.71610000  |
| H  | 3.61060000  | 1.17240000  | 2.08450000  |
| C  | 4.48690000  | 0.56120000  | -0.49090000 |
| H  | 4.61860000  | 0.94680000  | -1.50470000 |
| H  | 5.19250000  | 1.09740000  | 0.15350000  |
| H  | 4.78470000  | -0.49170000 | -0.48390000 |
| C  | -1.98990000 | -3.58200000 | -1.61480000 |
| H  | -0.93220000 | -3.31190000 | -1.62080000 |
| H  | -2.28330000 | -3.74110000 | -0.57490000 |
| H  | -2.10410000 | -4.53440000 | -2.14480000 |
| C  | -4.31560000 | -2.98750000 | -2.24750000 |
| H  | -5.01360000 | -2.25900000 | -2.67050000 |
| H  | -4.42640000 | -3.90950000 | -2.82810000 |
| H  | -4.62890000 | -3.21240000 | -1.22450000 |
| H  | -4.59470000 | -0.17260000 | -2.85000000 |
| H  | 3.49690000  | -0.68740000 | -2.67070000 |
| C  | 2.67620000  | 2.23790000  | -0.16760000 |
| H  | 3.45400000  | 2.88920000  | 0.24660000  |
| H  | 2.56670000  | 2.49490000  | -1.22660000 |
| H  | 1.74070000  | 2.48820000  | 0.33640000  |
| C  | -2.41530000 | -2.38510000 | -3.76330000 |
| H  | -2.40660000 | -3.37030000 | -4.24080000 |
| H  | -3.09050000 | -1.74890000 | -4.34230000 |
| H  | -1.40540000 | -1.97040000 | -3.84140000 |
| H  | 1.82100000  | -0.86710000 | -3.24190000 |
| H  | 2.48750000  | 0.74250000  | -2.99520000 |
| H  | -3.79800000 | 1.21020000  | -2.08080000 |
| H  | -3.05500000 | 0.45590000  | -3.48710000 |
| H  | -0.42000000 | 0.72020000  | -2.19660000 |
| H  | -0.21160000 | -1.32660000 | -2.00700000 |
| C  | -0.99970000 | 2.10760000  | 0.03590000  |
| C  | -0.67090000 | 1.34800000  | 1.10840000  |
| H  | 0.38290000  | 1.15020000  | 1.27610000  |
| H  | -0.19520000 | 2.47160000  | -0.59590000 |
| C  | -2.35000000 | 2.71400000  | -0.21460000 |
| H  | -2.35670000 | 3.12610000  | -1.22850000 |
| H  | -3.12430000 | 1.94000000  | -0.20530000 |
| C  | -1.55710000 | 1.05350000  | 2.27670000  |
| H  | -2.57880000 | 0.82520000  | 1.95760000  |
| H  | -1.20310000 | 0.15830000  | 2.79290000  |
| C  | -2.78160000 | 3.80590000  | 0.79160000  |
| H  | -1.90350000 | 4.36290000  | 1.14150000  |

|   |             |            |            |
|---|-------------|------------|------------|
| H | -3.38770000 | 4.53440000 | 0.24390000 |
| C | -1.55970000 | 2.27060000 | 3.23330000 |
| H | -1.29160000 | 1.95120000 | 4.24500000 |
| H | -0.76060000 | 2.95690000 | 2.92790000 |
| C | -3.60780000 | 3.28940000 | 1.98090000 |
| H | -4.12400000 | 2.37160000 | 1.66860000 |
| H | -4.41480000 | 4.00050000 | 2.18850000 |
| C | -2.88060000 | 3.03800000 | 3.30250000 |
| H | -3.57380000 | 2.50240000 | 3.96250000 |
| H | -2.69010000 | 3.99810000 | 3.79770000 |

Sum of electronic and thermal Energies= -2097.076590

Sum of electronic and thermal Enthalpies= -2097.075645

Sum of electronic and thermal Free Energies= -2097.184145

---

**TS-2'-H<sub>2</sub>(cyclooctane)- 2'-H(η<sup>2</sup>-Cy)**


---

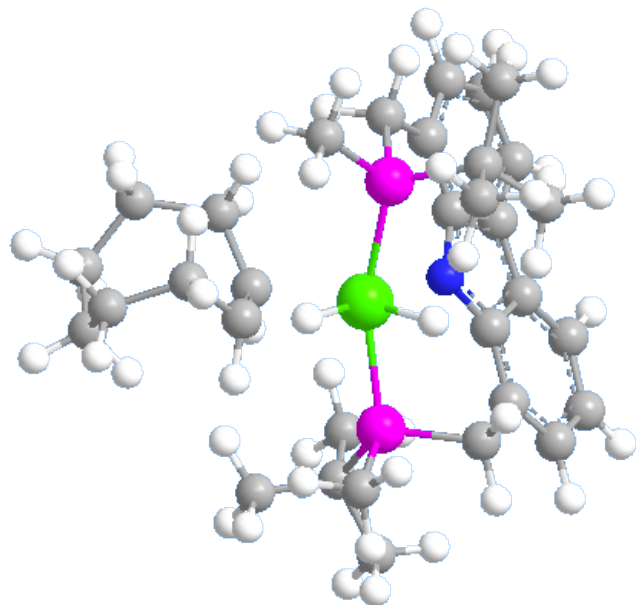

|    |            |            |            |
|----|------------|------------|------------|
| C  | 3.9460000  | -2.5208000 | 3.2775000  |
| C  | 2.8601000  | -3.1176000 | 2.6304000  |
| C  | 2.0940000  | -2.4667000 | 1.6643000  |
| C  | 2.4346000  | -1.1325000 | 1.3444000  |
| C  | 3.5924000  | -0.5601000 | 1.9549000  |
| C  | 4.3266000  | -1.2379000 | 2.9265000  |
| H  | 4.5018000  | -3.0791000 | 4.0232000  |
| H  | 2.6027000  | -4.1466000 | 2.8728000  |
| H  | 5.1960000  | -0.7704000 | 3.3802000  |
| C  | 2.7498000  | 0.8193000  | 0.3507000  |
| C  | 2.7444000  | 1.9471000  | -0.5030000 |
| C  | 3.7300000  | 2.9130000  | -0.3143000 |
| C  | 4.7267000  | 2.8041000  | 0.6626000  |
| C  | 4.7622000  | 1.6879000  | 1.4789000  |
| C  | 3.7909000  | 0.6997000  | 1.3173000  |
| H  | 3.7225000  | 3.7819000  | -0.9692000 |
| H  | 5.4710000  | 3.5868000  | 0.7624000  |
| H  | 5.5379000  | 1.5735000  | 2.2310000  |
| N  | 1.8923000  | -0.2655000 | 0.4112000  |
| C  | 1.7268000  | 2.1668000  | -1.5819000 |
| H  | 1.8484000  | 1.4584000  | -2.4089000 |
| H  | 1.8279000  | 3.1756000  | -1.9965000 |
| C  | 0.9936000  | -3.2673000 | 1.0210000  |
| H  | 1.3089000  | -4.3114000 | 0.9155000  |
| H  | 0.1163000  | -3.2998000 | 1.6751000  |
| P  | 0.0232000  | 1.8855000  | -0.9753000 |
| P  | 0.3678000  | -2.6676000 | -0.5915000 |
| Rh | -0.0816000 | -0.4044000 | -0.5147000 |

|   |             |             |             |
|---|-------------|-------------|-------------|
| H | 0.62600000  | -0.42230000 | -1.96530000 |
| H | -1.53740000 | -0.54710000 | -1.23730000 |
| C | -0.99910000 | 2.39170000  | -2.40600000 |
| H | -2.05240000 | 2.16000000  | -2.23760000 |
| H | -0.90390000 | 3.45690000  | -2.63220000 |
| H | -0.66690000 | 1.81500000  | -3.27130000 |
| C | -1.02730000 | -3.82210000 | -0.87730000 |
| H | -1.60930000 | -3.50790000 | -1.74510000 |
| H | -0.68910000 | -4.85030000 | -1.02940000 |
| H | -1.68440000 | -3.80630000 | -0.00520000 |
| C | -0.26720000 | 3.24780000  | 0.30390000  |
| C | 0.43290000  | 2.88690000  | 1.62050000  |
| H | 0.26570000  | 1.84720000  | 1.91360000  |
| H | 1.51220000  | 3.03590000  | 1.56030000  |
| H | 0.05270000  | 3.53170000  | 2.42090000  |
| C | -1.77530000 | 3.36400000  | 0.54290000  |
| H | -1.96740000 | 4.15410000  | 1.27690000  |
| H | -2.32610000 | 3.62690000  | -0.36530000 |
| H | -2.20200000 | 2.44230000  | 0.94780000  |
| C | 0.26900000  | 4.59190000  | -0.19140000 |
| H | 0.02540000  | 5.37080000  | 0.53990000  |
| H | 1.35690000  | 4.57830000  | -0.29570000 |
| H | -0.16910000 | 4.90000000  | -1.14570000 |
| C | 1.64260000  | -3.22180000 | -1.87150000 |
| C | 2.86100000  | -2.29790000 | -1.85370000 |
| H | 2.58790000  | -1.26180000 | -2.06150000 |
| H | 3.38100000  | -2.32050000 | -0.89250000 |
| H | 3.56710000  | -2.63000000 | -2.62310000 |
| C | 0.97450000  | -3.15940000 | -3.24640000 |
| H | 0.56130000  | -2.16610000 | -3.44420000 |
| H | 1.71600000  | -3.37300000 | -4.02320000 |
| H | 0.17210000  | -3.89580000 | -3.35200000 |
| C | 2.11490000  | -4.65080000 | -1.59190000 |
| H | 1.29530000  | -5.37080000 | -1.51140000 |
| H | 2.75130000  | -4.98490000 | -2.41810000 |
| H | 2.71710000  | -4.70970000 | -0.68170000 |
| C | -1.55810000 | -0.29480000 | 1.20520000  |
| H | -1.38000000 | 0.66650000  | 1.68050000  |
| C | -2.28690000 | -0.24220000 | -0.03120000 |
| H | -2.56860000 | 0.76390000  | -0.35330000 |
| C | -1.74400000 | -1.42810000 | 2.18650000  |
| H | -1.44050000 | -2.37350000 | 1.72830000  |
| H | -1.03330000 | -1.27140000 | 3.00570000  |
| C | -3.43320000 | -1.20970000 | -0.25530000 |
| H | -3.62160000 | -1.36530000 | -1.32340000 |
| H | -3.16340000 | -2.18990000 | 0.14350000  |
| C | -3.15430000 | -1.67860000 | 2.77240000  |

|   |             |             |             |
|---|-------------|-------------|-------------|
| H | -3.67300000 | -2.42850000 | 2.16220000  |
| H | -3.03070000 | -2.15880000 | 3.74980000  |
| C | -4.72700000 | -0.67360000 | 0.40350000  |
| H | -5.25900000 | -0.07250000 | -0.34320000 |
| H | -5.38970000 | -1.52050000 | 0.62020000  |
| C | -4.09170000 | -0.48870000 | 2.93980000  |
| H | -3.63420000 | 0.26140000  | 3.59690000  |
| H | -4.97210000 | -0.85200000 | 3.48370000  |
| C | -4.56690000 | 0.20080000  | 1.65150000  |
| H | -3.90370000 | 1.03800000  | 1.41230000  |
| H | -5.53790000 | 0.66740000  | 1.85260000  |

Sum of electronic and thermal Energies= -2097.056381  
Sum of electronic and thermal Enthalpies= -2097.055437  
Sum of electronic and thermal Free Energies= -2097.160742

\*\*\*\*\* 1 imaginary frequencies (negative Signs) \*\*\*\*\*

Diagonal vibrational polarizability:

39.5593897 28.3446869 30.5213456

Harmonic frequencies (cm<sup>-1</sup>), IR intensities (KM/Mole), Raman scattering activities (A<sup>4</sup>/AMU), depolarization ratios for plane and unpolarized incident light, reduced masses (AMU), force constants (mDyne/A), and normal coordinates:

|                | 1         | 2       | 3       |
|----------------|-----------|---------|---------|
|                | A         | A       | A       |
| Frequencies -- | -585.0617 | 22.6331 | 37.2970 |
| Red. masses -- | 1.3190    | 4.5402  | 4.5678  |
| Frc consts --  | 0.2660    | 0.0014  | 0.0037  |
| IR Inten --    | 0.4104    | 0.1500  | 0.3091  |

-----  
**2'-H( $\eta^2$ -Cy)**  
 -----

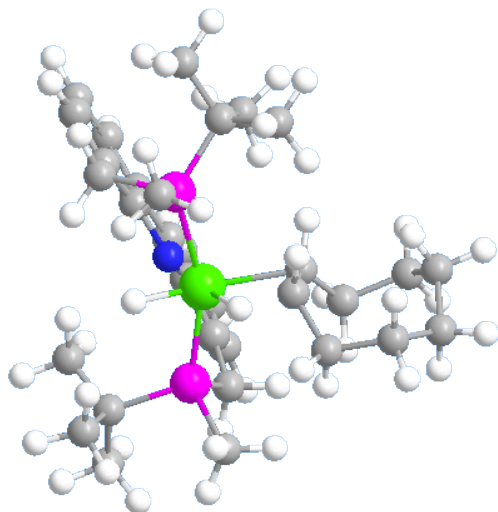

|   |             |             |             |
|---|-------------|-------------|-------------|
| C | 2.70690000  | -3.25180000 | 3.33740000  |
| C | 1.55850000  | -3.55010000 | 2.59750000  |
| C | 1.08260000  | -2.74150000 | 1.56640000  |
| C | 1.79900000  | -1.55530000 | 1.28130000  |
| C | 3.01250000  | -1.29940000 | 1.99000000  |
| C | 3.45070000  | -2.12910000 | 3.02070000  |
| H | 3.02550000  | -3.92110000 | 4.12940000  |
| H | 1.01370000  | -4.46610000 | 2.81590000  |
| H | 4.37370000  | -1.90520000 | 3.54800000  |
| C | 2.70950000  | 0.22360000  | 0.32280000  |
| C | 3.06490000  | 1.30330000  | -0.51820000 |
| C | 4.25480000  | 1.97320000  | -0.24630000 |
| C | 5.10890000  | 1.61350000  | 0.80330000  |
| C | 4.78160000  | 0.54220000  | 1.61500000  |
| C | 3.59640000  | -0.15330000 | 1.37280000  |
| H | 4.52810000  | 2.80700000  | -0.88980000 |
| H | 6.02580000  | 2.16970000  | 0.96560000  |
| H | 5.43750000  | 0.23820000  | 2.42600000  |
| N | 1.59730000  | -0.59790000 | 0.30210000  |
| C | 2.21240000  | 1.77950000  | -1.65580000 |
| H | 2.18390000  | 1.05580000  | -2.47790000 |
| H | 2.60680000  | 2.71940000  | -2.05670000 |
| C | -0.12760000 | -3.22920000 | 0.81420000  |
| H | -0.10570000 | -4.32280000 | 0.74540000  |
| H | -1.04700000 | -2.98760000 | 1.35950000  |
| P | 0.46220000  | 1.97140000  | -1.14820000 |
| P | -0.38440000 | -2.50400000 | -0.84440000 |
| C | 0.47490000  | 3.38220000  | 0.11160000  |
| C | -0.30860000 | 2.71240000  | -2.63340000 |
| C | -1.96520000 | -3.29960000 | -1.32670000 |
| C | 0.85160000  | -3.35660000 | -1.99580000 |

|    |             |             |             |
|----|-------------|-------------|-------------|
| C  | -2.42820000 | 0.43600000  | -0.22440000 |
| C  | -1.59710000 | 0.26990000  | 0.97320000  |
| H  | -2.60470000 | 1.48780000  | -0.48410000 |
| H  | -1.24890000 | 1.21460000  | 1.38790000  |
| Rh | -0.26020000 | -0.20770000 | -0.70430000 |
| H  | -1.83530000 | 0.12540000  | -1.29710000 |
| H  | 0.39080000  | -0.39240000 | -2.19690000 |
| C  | 1.35460000  | 4.54100000  | -0.35980000 |
| H  | 1.04970000  | 4.94020000  | -1.33200000 |
| H  | 1.28750000  | 5.36450000  | 0.36020000  |
| H  | 2.40690000  | 4.25080000  | -0.41750000 |
| C  | 1.00470000  | 2.87860000  | 1.46150000  |
| H  | 0.58750000  | 1.90960000  | 1.74640000  |
| H  | 2.09060000  | 2.77120000  | 1.45450000  |
| H  | 0.74820000  | 3.60200000  | 2.24380000  |
| C  | 0.33180000  | -3.19660000 | -3.42630000 |
| H  | 0.16400000  | -2.14360000 | -3.67150000 |
| H  | 1.07430000  | -3.58790000 | -4.12940000 |
| H  | -0.59870000 | -3.74540000 | -3.59750000 |
| C  | 2.23710000  | -2.71940000 | -1.89460000 |
| H  | 2.20680000  | -1.65410000 | -2.13010000 |
| H  | 2.67370000  | -2.83280000 | -0.89950000 |
| H  | 2.90400000  | -3.21350000 | -2.61020000 |
| H  | -2.67180000 | -3.22690000 | -0.49860000 |
| H  | 0.07980000  | 3.71000000  | -2.85460000 |
| C  | 0.97250000  | -4.84210000 | -1.64790000 |
| H  | 0.01110000  | -5.36450000 | -1.63470000 |
| H  | 1.59340000  | -5.33790000 | -2.40150000 |
| H  | 1.45940000  | -4.99330000 | -0.68080000 |
| C  | -0.96560000 | 3.87780000  | 0.27380000  |
| H  | -1.37720000 | 4.27450000  | -0.65910000 |
| H  | -1.63700000 | 3.09490000  | 0.63710000  |
| H  | -0.99170000 | 4.68920000  | 1.00930000  |
| H  | -2.39910000 | -2.80010000 | -2.19410000 |
| H  | -1.82910000 | -4.35840000 | -1.56140000 |
| H  | -1.39270000 | 2.77240000  | -2.52200000 |
| H  | -0.09770000 | 2.05410000  | -3.47820000 |
| C  | -1.98220000 | -0.68040000 | 2.07510000  |
| H  | -2.54320000 | -1.53500000 | 1.67410000  |
| H  | -1.08280000 | -1.10510000 | 2.53790000  |
| C  | -3.71680000 | -0.36210000 | -0.41770000 |
| H  | -3.94540000 | -0.40300000 | -1.48930000 |
| H  | -3.56480000 | -1.40090000 | -0.11230000 |
| C  | -4.93140000 | 0.21220000  | 0.31080000  |
| H  | -5.00330000 | 1.28830000  | 0.09810000  |
| H  | -5.82400000 | -0.23390000 | -0.14310000 |
| C  | -2.80650000 | 0.00240000  | 3.17240000  |



|   |             |             |            |
|---|-------------|-------------|------------|
| H | -3.14530000 | -0.75370000 | 3.89280000 |
| H | -2.14950000 | 0.67780000  | 3.73470000 |
| C | -4.00700000 | 0.79640000  | 2.66850000 |
| H | -4.52080000 | 1.22210000  | 3.53670000 |
| H | -3.65610000 | 1.66210000  | 2.08960000 |
| C | -5.00850000 | -0.00240000 | 1.82200000 |
| H | -4.91000000 | -1.07500000 | 2.04090000 |
| H | -6.02580000 | 0.25890000  | 2.13190000 |

Sum of electronic and thermal Energies= -2097.066137

Sum of electronic and thermal Enthalpies= -2097.065192

Sum of electronic and thermal Free Energies= -2097.170922

---

**TS-2'-H( $\eta^2$ -Cy)- 2'-H(Cy)**

---

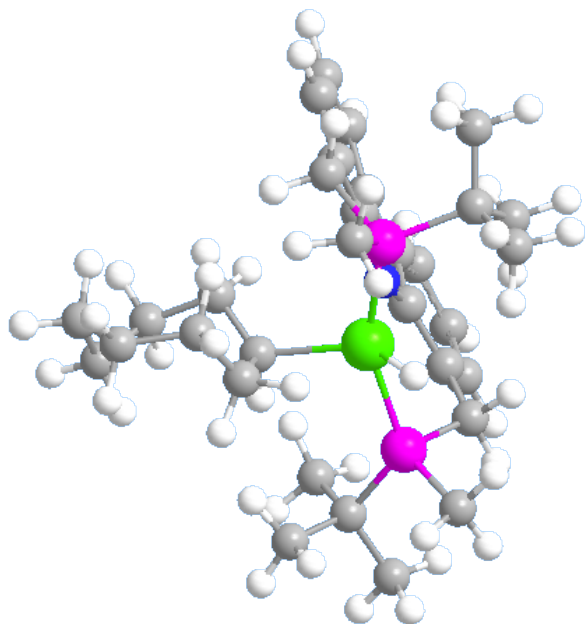

|   |            |            |            |
|---|------------|------------|------------|
| C | -3.8350000 | -2.3423000 | 3.3617000  |
| C | -4.0923000 | -1.3684000 | 2.3913000  |
| C | -3.1627000 | -0.9905000 | 1.4240000  |
| C | -1.9069000 | -1.6426000 | 1.4337000  |
| C | -1.6651000 | -2.6607000 | 2.4055000  |
| C | -2.6160000 | -2.9970000 | 3.3676000  |
| H | -4.6001000 | -2.5918000 | 4.0890000  |
| H | -5.0642000 | -0.8799000 | 2.3786000  |
| H | -2.4051000 | -3.7746000 | 4.0963000  |
| C | 0.0797000  | -2.5006000 | 0.9491000  |
| C | 1.2578000  | -2.9376000 | 0.3046000  |
| C | 1.9806000  | -3.9620000 | 0.9107000  |
| C | 1.5679000  | -4.5923000 | 2.0905000  |
| C | 0.3700000  | -4.2278000 | 2.6788000  |
| C | -0.3775000 | -3.1993000 | 2.1041000  |
| H | 2.8941000  | -4.2975000 | 0.4237000  |
| H | 2.1725000  | -5.3863000 | 2.5157000  |
| H | 0.0058000  | -4.7409000 | 3.5644000  |
| N | -0.8217000 | -1.5149000 | 0.5843000  |
| C | 1.7191000  | -2.4328000 | -1.0311000 |
| H | 1.0135000  | -2.7383000 | -1.8160000 |
| H | 2.6820000  | -2.8885000 | -1.2911000 |
| C | -3.5707000 | 0.0816000  | 0.4510000  |
| H | -4.6572000 | 0.0621000  | 0.3058000  |
| H | -3.3450000 | 1.0788000  | 0.8550000  |
| P | 1.8002000  | -0.6076000 | -1.2097000 |
| P | -2.7056000 | 0.0616000  | -1.1611000 |
| C | 3.3556000  | -0.0937000 | -0.2558000 |

|    |             |             |             |
|----|-------------|-------------|-------------|
| C  | 2.34690000  | -0.46910000 | -2.95480000 |
| C  | -3.46790000 | 1.50630000  | -1.98750000 |
| C  | -3.40690000 | -1.39800000 | -2.13230000 |
| C  | -0.12390000 | 2.52320000  | -0.03030000 |
| C  | 0.01980000  | 1.33680000  | 0.86860000  |
| H  | 0.82330000  | 3.07660000  | -0.11410000 |
| H  | 1.06470000  | 1.08590000  | 1.04150000  |
| Rh | -0.43950000 | 0.04540000  | -0.82030000 |
| H  | -0.21470000 | 2.09820000  | -1.08370000 |
| H  | -0.45250000 | 0.31340000  | -2.46710000 |
| C  | 4.61850000  | -0.71120000 | -0.85980000 |
| H  | 4.84510000  | -0.31330000 | -1.85190000 |
| H  | 5.47600000  | -0.48200000 | -0.21700000 |
| H  | 4.55740000  | -1.80110000 | -0.93240000 |
| C  | 3.24650000  | -0.54460000 | 1.20460000  |
| H  | 2.27860000  | -0.31610000 | 1.65870000  |
| H  | 3.39310000  | -1.62160000 | 1.30590000  |
| H  | 4.02020000  | -0.04540000 | 1.79930000  |
| C  | -3.19080000 | -1.11300000 | -3.62000000 |
| H  | -2.14310000 | -0.87800000 | -3.83390000 |
| H  | -3.46130000 | -1.99910000 | -4.20370000 |
| H  | -3.80780000 | -0.28510000 | -3.97970000 |
| C  | -2.66110000 | -2.67900000 | -1.75830000 |
| H  | -1.58660000 | -2.57740000 | -1.93470000 |
| H  | -2.80000000 | -2.94930000 | -0.70890000 |
| H  | -3.03650000 | -3.50610000 | -2.37140000 |
| H  | -3.35060000 | 2.38550000  | -1.35250000 |
| H  | 3.22910000  | -1.07820000 | -3.16780000 |
| C  | -4.89740000 | -1.57400000 | -1.84290000 |
| H  | -5.47600000 | -0.66400000 | -2.03280000 |
| H  | -5.30670000 | -2.35470000 | -2.49320000 |
| H  | -5.07580000 | -1.88610000 | -0.81020000 |
| C  | 3.47670000  | 1.43160000  | -0.32980000 |
| H  | 3.46150000  | 1.80000000  | -1.36070000 |
| H  | 2.68020000  | 1.93960000  | 0.21830000  |
| H  | 4.42760000  | 1.74830000  | 0.11320000  |
| H  | -2.96470000 | 1.70330000  | -2.93460000 |
| H  | -4.53570000 | 1.35450000  | -2.17160000 |
| H  | 2.55870000  | 0.57110000  | -3.21030000 |
| H  | 1.52150000  | -0.79780000 | -3.58740000 |
| C  | -0.71890000 | 1.26390000  | 2.17620000  |
| H  | -1.74030000 | 1.65010000  | 2.09090000  |
| H  | -0.81690000 | 0.22440000  | 2.49450000  |
| C  | -1.28410000 | 3.49670000  | 0.17960000  |
| H  | -1.54410000 | 3.92670000  | -0.79470000 |
| H  | -2.17840000 | 2.94900000  | 0.50440000  |
| C  | -1.01580000 | 4.65730000  | 1.13610000  |

|   |             |            |            |
|---|-------------|------------|------------|
| H | -0.10410000 | 5.17590000 | 0.80660000 |
| H | -1.82600000 | 5.38630000 | 1.01490000 |
| C | 0.02840000  | 2.01500000 | 3.28730000 |
| H | -0.57140000 | 1.94610000 | 4.20370000 |
| H | 0.96490000  | 1.48450000 | 3.50140000 |
| C | 0.33900000  | 3.47960000 | 3.00140000 |
| H | 0.81910000  | 3.90190000 | 3.89040000 |
| H | 1.09650000  | 3.55280000 | 2.20910000 |
| C | -0.88200000 | 4.32930000 | 2.62080000 |
| H | -1.79950000 | 3.83600000 | 2.97050000 |
| H | -0.84490000 | 5.28000000 | 3.16290000 |

Sum of electronic and thermal Energies= -2097.055077  
Sum of electronic and thermal Enthalpies= -2097.054133  
Sum of electronic and thermal Free Energies= -2097.161752

\*\*\*\*\* 1 imaginary frequencies (negative Signs) \*\*\*\*\*

Diagonal vibrational polarizability:

32.6668398 40.1980840 51.2838769

Harmonic frequencies (cm<sup>-1</sup>), IR intensities (KM/Mole), Raman scattering activities (A<sup>4</sup>/AMU), depolarization ratios for plane and unpolarized incident light, reduced masses (AMU), force constants (mDyne/A), and normal coordinates:

|                | 1         | 2       | 3       |
|----------------|-----------|---------|---------|
|                | A         | A       | A       |
| Frequencies -- | -291.7695 | 10.7952 | 35.5444 |
| Red. masses -- | 1.5662    | 4.0997  | 4.0111  |
| Frc consts --  | 0.0786    | 0.0003  | 0.0030  |
| IR Inten --    | 21.4495   | 0.1157  | 0.2334  |

-----  
**2'-H(Cy)**  
 -----

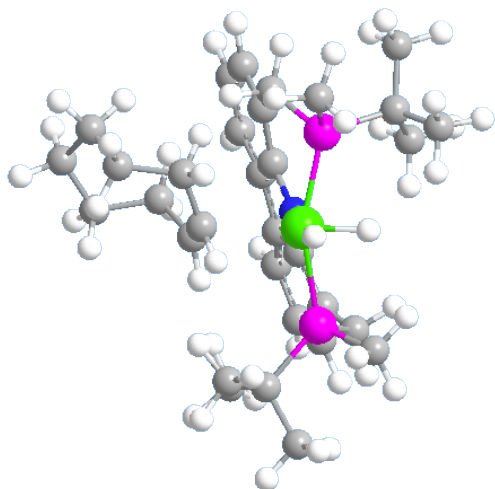

|   |             |             |             |
|---|-------------|-------------|-------------|
| C | 4.87110000  | -2.13810000 | 2.55710000  |
| C | 3.62020000  | -2.72230000 | 2.33090000  |
| C | 2.61640000  | -2.10180000 | 1.58960000  |
| C | 2.89760000  | -0.83450000 | 1.03620000  |
| C | 4.17960000  | -0.25420000 | 1.25590000  |
| C | 5.15480000  | -0.89500000 | 2.02000000  |
| H | 5.61320000  | -2.66830000 | 3.14420000  |
| H | 3.41150000  | -3.70450000 | 2.74920000  |
| H | 6.12450000  | -0.43010000 | 2.17430000  |
| C | 2.91240000  | 1.05400000  | -0.10850000 |
| C | 2.64350000  | 2.14320000  | -0.96700000 |
| C | 3.62160000  | 3.12660000  | -1.09360000 |
| C | 4.85400000  | 3.06090000  | -0.43260000 |
| C | 5.14390000  | 1.97450000  | 0.37360000  |
| C | 4.18250000  | 0.97520000  | 0.52860000  |
| H | 3.41510000  | 3.97160000  | -1.74690000 |
| H | 5.57910000  | 3.85610000  | -0.56870000 |
| H | 6.10310000  | 1.89660000  | 0.87750000  |
| N | 2.10860000  | -0.02710000 | 0.22520000  |
| C | 1.37610000  | 2.28140000  | -1.75690000 |
| H | 1.34330000  | 1.54890000  | -2.57630000 |
| H | 1.32140000  | 3.27470000  | -2.21660000 |
| C | 1.30210000  | -2.81340000 | 1.45260000  |
| H | 1.43500000  | -3.88160000 | 1.66110000  |
| H | 0.58690000  | -2.44520000 | 2.20480000  |
| P | -0.13800000 | 1.93150000  | -0.78950000 |
| P | 0.40480000  | -2.59650000 | -0.13380000 |
| C | -0.22040000 | 3.23510000  | 0.56830000  |
| C | -1.45630000 | 2.41960000  | -1.96070000 |
| C | -0.89610000 | -3.87270000 | 0.10000000  |
| C | 1.46760000  | -3.34630000 | -1.49770000 |

|    |             |             |             |
|----|-------------|-------------|-------------|
| Rh | -0.01250000 | -0.31090000 | -0.29790000 |
| C  | 2.49210000  | -2.32380000 | -1.99320000 |
| H  | 2.01220000  | -1.39580000 | -2.31710000 |
| H  | 3.22530000  | -2.06580000 | -1.22640000 |
| H  | 3.03420000  | -2.74790000 | -2.84600000 |
| C  | 2.19530000  | -4.59460000 | -0.99990000 |
| H  | 1.51160000  | -5.35600000 | -0.61180000 |
| H  | 2.74780000  | -5.05280000 | -1.82750000 |
| H  | 2.92110000  | -4.35230000 | -0.21830000 |
| C  | 0.68460000  | 2.81630000  | 1.73020000  |
| H  | 0.45340000  | 1.80470000  | 2.07960000  |
| H  | 1.74270000  | 2.83980000  | 1.46230000  |
| H  | 0.53740000  | 3.50360000  | 2.57090000  |
| C  | 0.21110000  | 4.60410000  | 0.04550000  |
| H  | -0.38300000 | 4.93400000  | -0.81260000 |
| H  | 0.08310000  | 5.35600000  | 0.83220000  |
| H  | 1.26630000  | 4.61040000  | -0.24150000 |
| H  | -1.45910000 | 3.49490000  | -2.15840000 |
| H  | -0.44540000 | -4.85830000 | 0.24820000  |
| C  | 0.53000000  | -3.70260000 | -2.65560000 |
| H  | 1.12180000  | -4.00050000 | -3.52720000 |
| H  | -0.13470000 | -4.53610000 | -2.41470000 |
| H  | -0.08630000 | -2.84760000 | -2.95460000 |
| C  | -1.66500000 | 3.29020000  | 1.06980000  |
| H  | -1.74010000 | 4.00770000  | 1.89410000  |
| H  | -2.37260000 | 3.60590000  | 0.29740000  |
| H  | -1.99120000 | 2.31930000  | 1.45430000  |
| H  | -1.48620000 | -3.63190000 | 0.98630000  |
| H  | -1.57650000 | -3.92400000 | -0.74910000 |
| H  | -1.28650000 | 1.89050000  | -2.90070000 |
| H  | -2.43860000 | 2.12530000  | -1.58700000 |
| H  | -0.69000000 | -0.53950000 | -1.66310000 |
| C  | -2.09010000 | -0.37130000 | 0.15590000  |
| H  | -2.40690000 | 0.66930000  | 0.06520000  |
| C  | -2.98460000 | -1.22050000 | -0.75750000 |
| H  | -2.41860000 | -2.07950000 | -1.12770000 |
| H  | -3.19930000 | -0.62880000 | -1.65990000 |
| C  | -2.05980000 | -0.69330000 | 1.64630000  |
| H  | -1.65420000 | -1.69970000 | 1.81580000  |
| H  | -1.32120000 | -0.01250000 | 2.10120000  |
| C  | -3.36340000 | -0.58240000 | 2.47390000  |
| H  | -3.91480000 | -1.52580000 | 2.42230000  |
| H  | -3.07300000 | -0.48930000 | 3.52720000  |
| C  | -4.29510000 | -1.76930000 | -0.18320000 |
| H  | -4.71260000 | -2.46850000 | -0.91840000 |
| H  | -4.05980000 | -2.39580000 | 0.68300000  |
| C  | -5.39320000 | -0.75250000 | 0.16140000  |

|   |             |             |             |
|---|-------------|-------------|-------------|
| H | -5.94710000 | -0.52740000 | -0.75840000 |
| H | -6.12450000 | -1.23120000 | 0.82690000  |
| C | -4.32920000 | 0.55650000  | 2.15430000  |
| H | -5.13740000 | 0.49700000  | 2.89460000  |
| H | -3.84390000 | 1.52260000  | 2.34340000  |
| C | -4.96320000 | 0.58710000  | 0.75850000  |
| H | -5.84940000 | 1.23100000  | 0.81060000  |
| H | -4.29960000 | 1.09020000  | 0.04730000  |

Sum of electronic and thermal Energies= -2097.090847

Sum of electronic and thermal Enthalpies= -2097.089903

Sum of electronic and thermal Free Energies= -2097.197183

-----  
**TS-2'-H(Cy)-2'**  
-----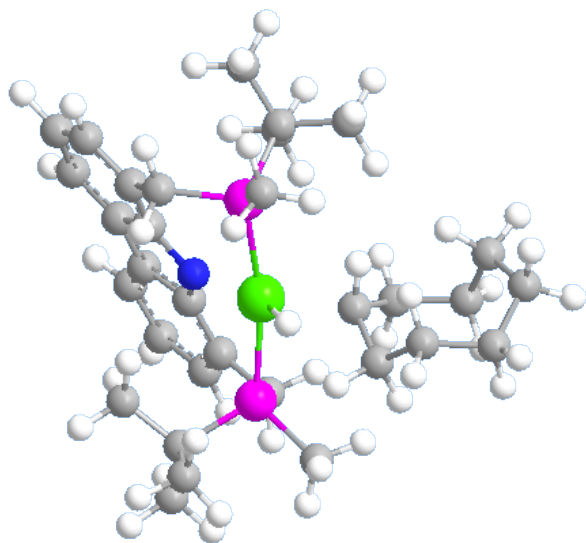

|   |             |             |             |
|---|-------------|-------------|-------------|
| C | 5.10370000  | -2.18390000 | 2.67470000  |
| C | 3.84720000  | -2.75740000 | 2.45340000  |
| C | 2.85060000  | -2.13930000 | 1.70100000  |
| C | 3.14100000  | -0.87930000 | 1.13120000  |
| C | 4.43360000  | -0.31620000 | 1.33870000  |
| C | 5.40140000  | -0.95580000 | 2.11340000  |
| H | 5.83900000  | -2.71240000 | 3.27190000  |
| H | 3.62790000  | -3.73290000 | 2.88200000  |
| H | 6.37720000  | -0.49990000 | 2.25530000  |
| C | 3.19170000  | 0.99370000  | -0.04710000 |
| C | 2.94020000  | 2.08630000  | -0.90620000 |
| C | 3.93940000  | 3.04560000  | -1.04800000 |
| C | 5.17570000  | 2.95740000  | -0.39690000 |
| C | 5.44330000  | 1.87380000  | 0.41980000  |
| C | 4.46090000  | 0.89710000  | 0.58870000  |
| H | 3.74410000  | 3.89210000  | -1.70290000 |
| H | 5.91780000  | 3.73450000  | -0.54480000 |
| H | 6.40080000  | 1.78050000  | 0.92430000  |
| N | 2.36990000  | -0.06660000 | 0.30650000  |
| C | 1.66020000  | 2.25890000  | -1.66500000 |
| H | 1.58650000  | 1.53300000  | -2.48710000 |
| H | 1.61660000  | 3.25720000  | -2.11550000 |
| C | 1.54220000  | -2.85890000 | 1.54870000  |
| H | 1.68040000  | -3.93060000 | 1.73480000  |
| H | 0.81680000  | -2.50850000 | 2.29880000  |
| P | 0.17140000  | 1.93580000  | -0.64910000 |
| P | 0.68450000  | -2.58420000 | -0.04670000 |
| C | 0.13940000  | 3.25770000  | 0.69340000  |
| C | -1.15090000 | 2.45900000  | -1.80810000 |
| C | -0.68260000 | -3.79640000 | 0.12460000  |



|    |             |             |             |
|----|-------------|-------------|-------------|
| C  | 1.74480000  | -3.35840000 | -1.40160000 |
| Rh | 0.29190000  | -0.31750000 | -0.15450000 |
| C  | 2.80960000  | -2.36710000 | -1.87430000 |
| H  | 2.36440000  | -1.41940000 | -2.19110000 |
| H  | 3.54340000  | -2.14380000 | -1.09710000 |
| H  | 3.34620000  | -2.79960000 | -2.72630000 |
| C  | 2.42140000  | -4.63500000 | -0.90460000 |
| H  | 1.70700000  | -5.37250000 | -0.52500000 |
| H  | 2.96410000  | -5.11010000 | -1.72930000 |
| H  | 3.14880000  | -4.42310000 | -0.11560000 |
| C  | 1.04420000  | 2.81510000  | 1.84650000  |
| H  | 0.78850000  | 1.80920000  | 2.19590000  |
| H  | 2.09910000  | 2.80720000  | 1.56400000  |
| H  | 0.92890000  | 3.50730000  | 2.68820000  |
| C  | 0.59930000  | 4.61410000  | 0.16430000  |
| H  | 0.00530000  | 4.95580000  | -0.68950000 |
| H  | 0.49880000  | 5.37250000  | 0.94900000  |
| H  | 1.65130000  | 4.59260000  | -0.13370000 |
| H  | -1.08120000 | 3.52260000  | -2.05310000 |
| H  | -0.29780000 | -4.81730000 | 0.20380000  |
| C  | 0.81250000  | -3.67180000 | -2.57600000 |
| H  | 1.40560000  | -3.98410000 | -3.44170000 |
| H  | 0.11370000  | -4.48200000 | -2.35180000 |
| H  | 0.23300000  | -2.79130000 | -2.87530000 |
| C  | -1.30080000 | 3.34780000  | 1.20350000  |
| H  | -1.34900000 | 4.03080000  | 2.05840000  |
| H  | -1.99350000 | 3.72540000  | 0.44560000  |
| H  | -1.66830000 | 2.37450000  | 1.54610000  |
| H  | -1.24710000 | -3.57500000 | 1.03310000  |
| H  | -1.36780000 | -3.74270000 | -0.72100000 |
| H  | -1.04140000 | 1.88220000  | -2.72910000 |
| H  | -2.14540000 | 2.25960000  | -1.40560000 |
| H  | -1.00610000 | -0.56220000 | -1.00830000 |
| C  | -1.93050000 | -0.40320000 | 0.13560000  |
| H  | -2.25620000 | 0.61940000  | -0.07000000 |
| C  | -1.86060000 | -0.59110000 | 1.65610000  |
| H  | -1.24670000 | 0.21140000  | 2.08440000  |
| H  | -1.33470000 | -1.52170000 | 1.89910000  |
| C  | -3.22560000 | -0.61950000 | 2.36180000  |
| H  | -3.71580000 | -1.57540000 | 2.14420000  |
| H  | -3.04710000 | -0.63450000 | 3.44170000  |
| C  | -2.95560000 | -1.33980000 | -0.55320000 |
| H  | -2.56390000 | -1.64900000 | -1.52880000 |
| H  | -3.05340000 | -2.27140000 | 0.01890000  |
| C  | -4.36230000 | -0.75490000 | -0.79670000 |
| H  | -4.74670000 | -1.22220000 | -1.70940000 |
| H  | -4.27730000 | 0.31450000  | -1.03940000 |

|   |             |             |             |
|---|-------------|-------------|-------------|
| C | -4.16050000 | 0.53840000  | 1.98330000  |
| H | -4.34600000 | 1.18190000  | 2.84920000  |
| H | -3.66290000 | 1.18880000  | 1.25450000  |
| C | -5.49780000 | 0.09590000  | 1.39630000  |
| H | -6.01350000 | 0.97920000  | 0.99980000  |
| H | -6.14470000 | -0.28730000 | 2.19550000  |
| C | -5.41240000 | -0.96790000 | 0.30020000  |
| H | -5.24590000 | -1.95660000 | 0.74650000  |
| H | -6.40080000 | -1.03800000 | -0.16690000 |

Sum of electronic and thermal Energies= -2097.073819  
Sum of electronic and thermal Enthalpies= -2097.072874  
Sum of electronic and thermal Free Energies= -2097.180185

\*\*\*\*\* 1 imaginary frequencies (negative Signs) \*\*\*\*\*

Diagonal vibrational polarizability:

65.8389287 30.3665444 28.9113256

Harmonic frequencies (cm<sup>-1</sup>), IR intensities (KM/Mole), Raman scattering activities (A<sup>4</sup>/AMU), depolarization ratios for plane and unpolarized incident light, reduced masses (AMU), force constants (mDyne/A), and normal coordinates:

|                | 1         | 2       | 3       |
|----------------|-----------|---------|---------|
|                | A         | A       | A       |
| Frequencies -- | -592.1426 | 22.1503 | 33.3440 |
| Red. masses -- | 1.1882    | 4.3201  | 4.3865  |
| Frc consts --  | 0.2455    | 0.0012  | 0.0029  |
| IR Inten --    | 329.6642  | 0.1954  | 0.2146  |
